# Supplementary material for: Development of a QM/MM(ABEEM) method combined with a polarizable force field to investigate the excision reaction mechanism of damaged thymine
Source: Royal Society of Chemistry journal article supplement (doi:10.1039/d2cp05873a), 2022-12-27
Supplement: d2cp05873a1.pdf [file d2cp05873a1.pdf]

## Supporting Information:

# Development of the QM/MM(ABEEM) Method Combined with Polarizable Force Field to Investigate the Excision Reaction Mechanism of Damaged Thymine

Cui Liu\*, He Jiang, Yue Li, Bing Xue, Yu-Ying Yao, Zhong-zhi Yang\*

School of Chemistry and Chemical Engineering, Liaoning Normal University, Dalian, 116029,  
People's Republic of China

Corresponding authors E-mail address:

liuc@lnnu.edu.cn (Cui Liu)

zzyang@lnnu.edu.cn (Zhong-zhi Yang)

Tel: +86 411-82159607

| Index                                                                                                                                                                                     | page |
|-------------------------------------------------------------------------------------------------------------------------------------------------------------------------------------------|------|
| 1. The labels of (5R,6S)-Tg and (5R,6S)-TgH in ABEEM PFF, structures and the charge transfers of RC, TS and PC of protonated bases in the mono- and di-functional reaction pathways. .... | S1   |
| 2. The parameters in $\chi^*(r)$ .....                                                                                                                                                    | S8   |
| 3. The charge transfer of neutral and protonated bases in mono- and di-functional reaction pathways.....                                                                                  | S9   |
| 4. The glycosidic bond lengths, the nucleophilic distances and the reaction angles of the neutral bases in the mono- and di-functional reaction pathways.....                             | S11  |
| 5. Cartesian coordinates for the structures of RC, TS and PC of neutral bases in the mono- and bi-functional reaction pathways. ....                                                      | S13  |
| 6. Cartesian coordinates for the structures of RC, TS and PC of protonated bases in the mono- and bi-functional reaction pathways.....                                                    | S50  |







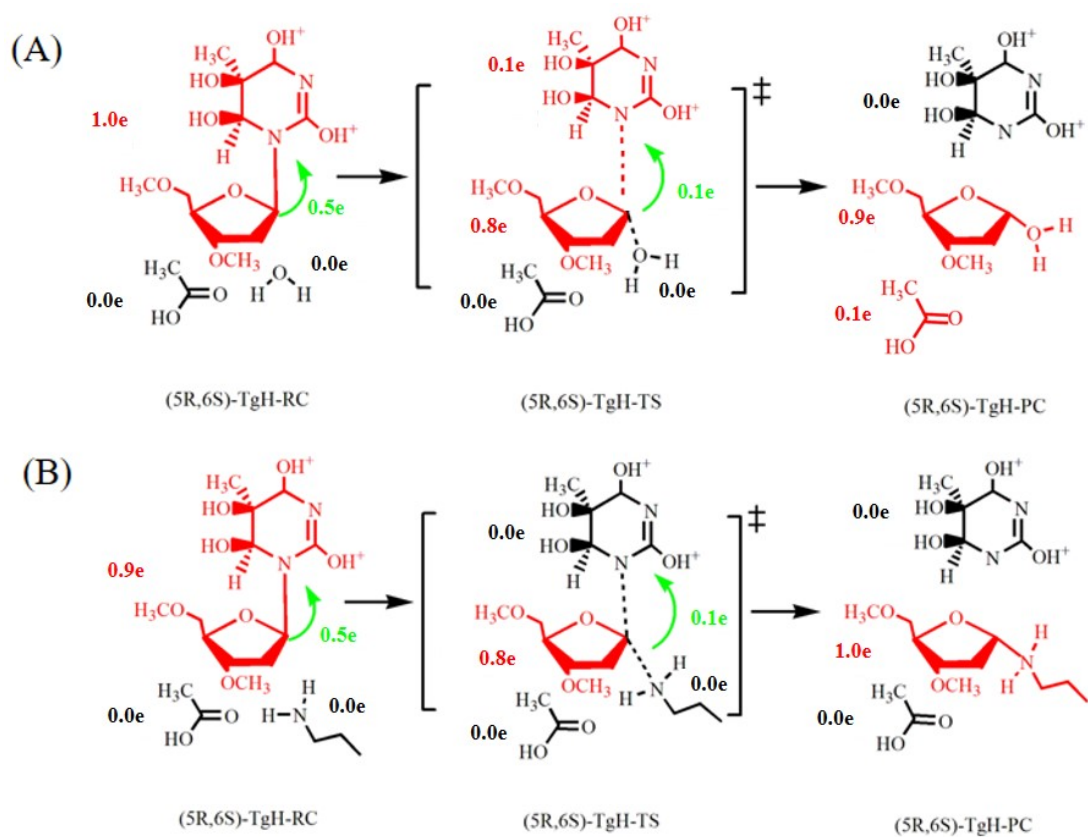

**Figure S7.** Schemes of the charge transfer among bases, pentoses, nucleophiles and catalytic residues during the excision of (5R,6S)-TgH under the (A) monofunctional and (B) difunctional reaction pathways.

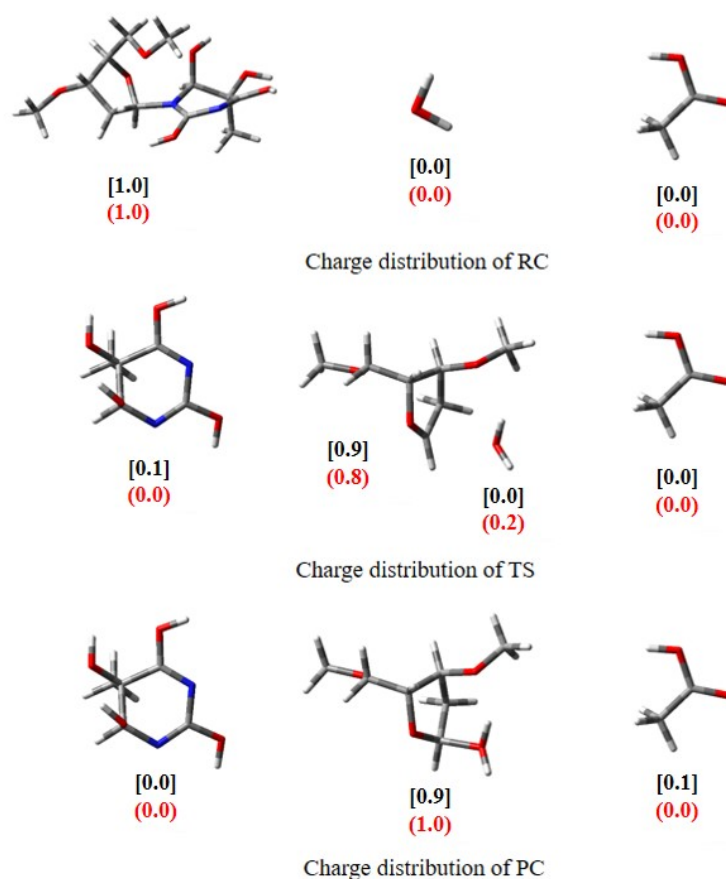

**Figure S8.** Schemes of the charge on each part of the RC, TS and PC calculated by ab initio (black font) and ABEEM PFF (red font) under the monofunctional pathway.

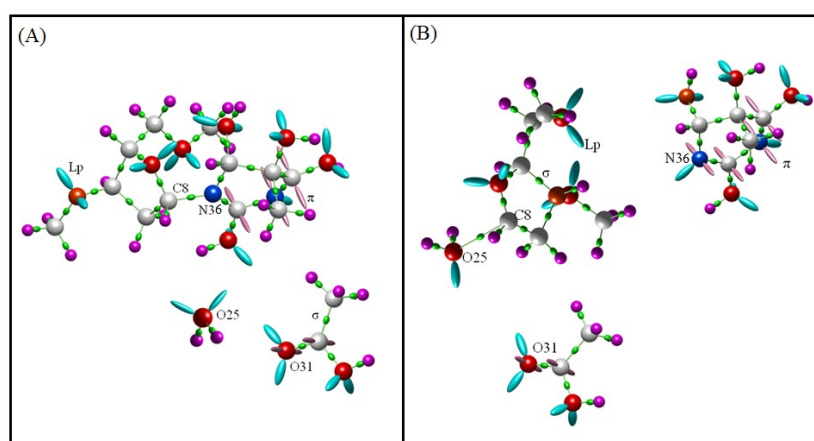

**Figure S9.** The sites of each part in the process from the (A) RC to (B) PC of (5R,6S)-TgH under the monofunctional reaction pathway in the ABEEM PFF. The numbers are Gaussian label.

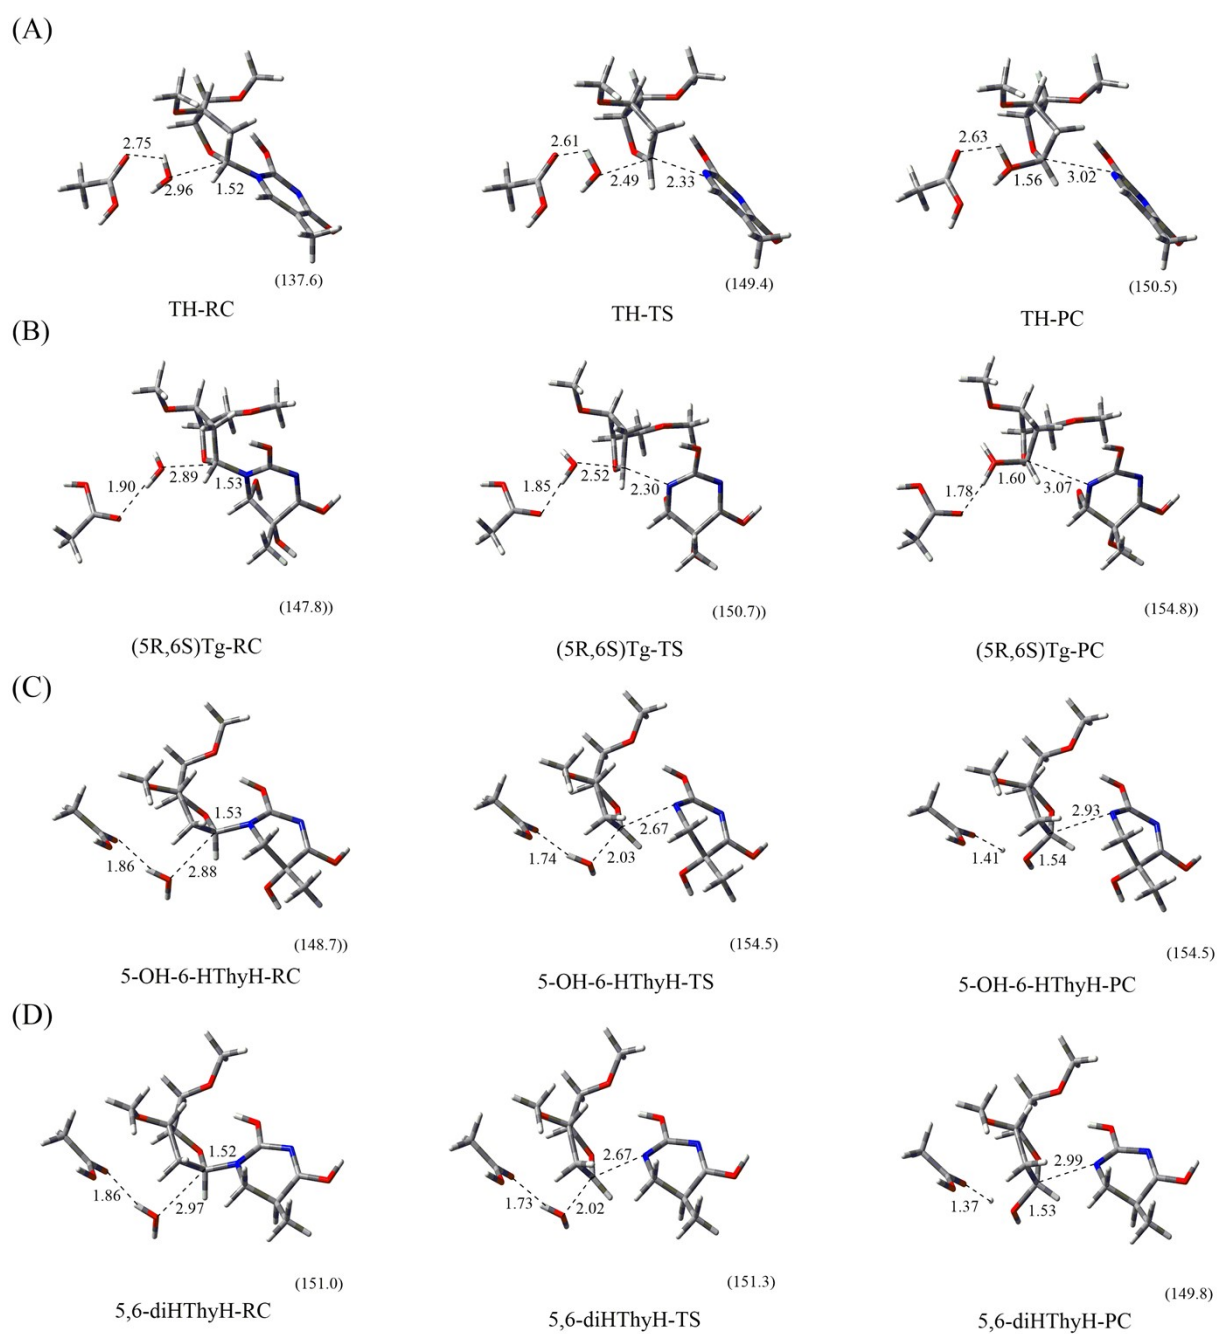

**Figure S10.** The structures of RC, TS and PC of protonated thymine and its damaged derivatives under the monofunctional pathway (Asp-H<sub>2</sub>O). These numbers denote C1'-N1 glycosidic bond length, C1'-O23 nucleophilic distance, O29-H24 the distance of nucleophile and amino acid (Å), and  $\angle(\text{O23-C1'-N1})$  reaction angles (in brackets, °).

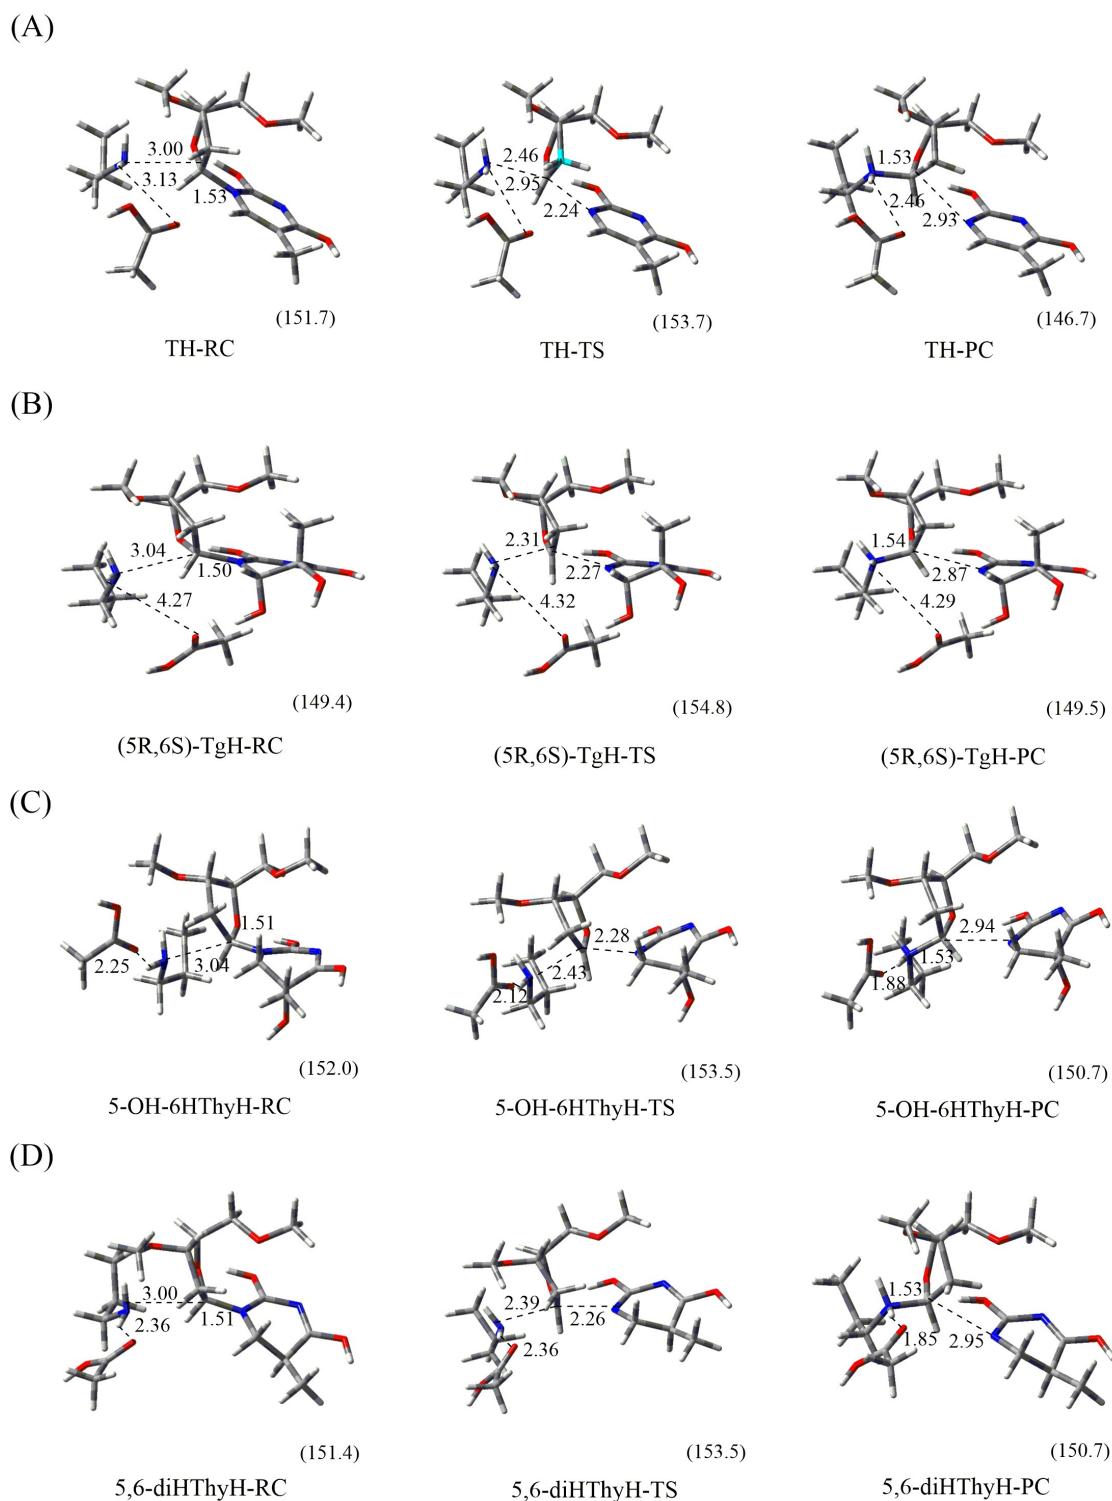

**Figure S11.** The structures of RC, TS and PC of protonated thymine and its damaged derivatives under the bifunctional pathway (Asp-Lys). These numbers denote C1'-N1 glycosidic bond length, N30-C1' nucleophilic distance, O29-H31 the distance of nucleophile and amino acid (Å), and  $\angle(\text{N30-C1'-N1})$  reaction angles (in brackets, °).



## 2. The parameters in $\chi^*(r)$

**Table S1.** The parameters in  $\chi^*(r)$  of C1'(106154) in (5R,6S)-TgH, which depends on variable  $r_{\text{C1}'\text{-N1}}$  under the Asp-H<sub>2</sub>O reaction pathway

| Distances(Å)         | Functions                                             | Distances(Å)         | Functions                                             |
|----------------------|-------------------------------------------------------|----------------------|-------------------------------------------------------|
| $r \leq 1.56$        | 2.94                                                  | $1.56 < r \leq 1.68$ | $2.41 + \frac{0.10}{1.00 + \exp \frac{r-1.62}{0.01}}$ |
| $1.68 < r \leq 2.58$ | $0.48 \times r^2 - 2.47 \times r + 5.21$              | $2.58 < r \leq 2.75$ | $2.54 + \frac{0.01}{1.00 + \exp \frac{r-2.72}{0.01}}$ |
| $r > 2.75$           | $2.66 - \frac{0.09}{1.00 + \exp \frac{r-2.90}{0.02}}$ |                      |                                                       |

**Table S2.** The parameters in  $\chi^*(r)$  of N1(107145) in (5R,6S)-TgH, which depends on variable  $r_{\text{C1}'\text{-N1}}$  under the Asp-H<sub>2</sub>O reaction pathway

| Distances(Å)         | Functions                                             | Distances(Å)         | Functions                                             |
|----------------------|-------------------------------------------------------|----------------------|-------------------------------------------------------|
| $r \leq 1.68$        | 3.70                                                  | $1.68 < r \leq 2.21$ | $5.41 - \frac{3.36}{1.00 + \exp \frac{r-1.80}{1.30}}$ |
| $2.21 < r \leq 2.67$ | $5.80 - \frac{3.75}{1.00 + \exp \frac{r-2.44}{3.90}}$ | $r > 2.67$           | 4.00                                                  |

**Table S3.** The parameters in  $\chi^*(r)$  of O23(108154) in (5R,6S)-TgH, which depends on variable  $r_{\text{O23-H24}}$  under the Asp-H<sub>2</sub>O reaction pathway

| Distances(Å)  | Functions                                             | Distances(Å)         | Functions              |
|---------------|-------------------------------------------------------|----------------------|------------------------|
| $r \leq 2.17$ | $3.57 - \frac{0.37}{1.00 + \exp \frac{r-1.88}{0.03}}$ | $2.17 < r \leq 2.52$ | $0.27 \times r + 3.54$ |
| $r > 2.52$    | 3.25                                                  |                      |                        |

### 3. The charge transfer of neutral and protonated bases in mono- and di-functional reaction pathways

**Table S4.** The charges in RC, TS and PC under different reaction pathways excision of thymine and its damaged derivatives

| Model1 | Nucleobase | Pentose | Nucleophile | Asp        | Nucleobase | Pentose | Nucleophile | Asp   |
|--------|------------|---------|-------------|------------|------------|---------|-------------|-------|
|        |            |         |             | T          | (5R,6S)-Tg |         |             |       |
| RC     | -0.25      | 0.22    | -0.08       | -0.90      | -0.22      | 0.20    | -0.06       | -0.91 |
| TS     | -0.89      | 0.78    | -0.03       | -0.85      | -0.93      | 0.74    | 0.03        | -0.83 |
| PC     | -0.98      | 0.05    | -           | -0.07      | -0.98      | 0.05    | -           | -0.07 |
|        |            |         |             | 5,6-diHThy | 5-OH-6HThy |         |             |       |
| RC     | -0.22      | 0.19    | -0.06       | -0.91      | -0.21      | 0.19    | -0.07       | -0.90 |
| TS     | -0.91      | 0.71    | 0.03        | -0.83      | -0.88      | 0.72    | 0.00        | -0.85 |
| PC     | -0.98      | 0.05    | -           | -0.07      | -0.98      | 0.05    | -           | -0.07 |
| Model2 | Nucleobase | Pentose | Nucleophile | Lys        | Nucleobase | Pentose | Nucleophile | Lys   |
|        |            |         |             | T          | (5R,6S)-Tg |         |             |       |
| RC     | -0.20      | 0.23    | -0.06       | 0.04       | -0.19      | -0.05   | 0.04        | -0.06 |
| TS     | -0.85      | 0.77    | 0.02        | 0.07       | -0.88      | 0.55    | 0.05        | -0.08 |
| PC     | -0.75      | 0.02    | -           | 0.73       | -0.96      | -0.09   | -           | 0.90  |
|        |            |         |             | 5,6-diHThy | 5-OH-6HThy |         |             |       |
| RC     | -0.20      | 0.20    | -0.07       | 0.03       | -0.17      | 0.22    | -0.05       | 0.02  |
| TS     | -0.84      | 0.73    | 0.04        | 0.07       | -0.83      | 0.55    | -0.01       | 0.04  |
| PC     | -0.43      | 0.01    | -           | 0.42       | -0.64      | -0.12   | -           | 0.62  |
| Model3 | Nucleobase | Pentose | Nucleophile | Asp        | Nucleobase | Pentose | Nucleophile | Asp   |
|        |            |         |             | T          | (5R,6S)-Tg |         |             |       |
| RC     | -0.28      | 0.23    | -0.03       | -0.91      | -0.32      | 0.18    | -0.02       | -0.84 |
| TS     | -0.86      | 0.71    | 0.05        | -0.91      | -0.89      | 0.66    | 0.09        | -0.86 |
| PC     | -0.98      | 0.40    | -           | -0.42      | -1.01      | 0.46    | -           | -0.45 |
|        |            |         |             | 5,6-diHThy | 5-OH-6HThy |         |             |       |
| RC     | -0.22      | 0.18    | -0.03       | -0.93      | -0.24      | 0.21    | -0.02       | -0.95 |
| TS     | -0.81      | 0.64    | 0.08        | -0.91      | -0.81      | 0.68    | 0.04        | -0.91 |
| PC     | -0.97      | 0.40    | -           | -0.43      | -0.97      | 0.47    | -           | -0.43 |
| Model4 | Nucleobase | Pentose | Nucleophile |            | Nucleobase | Pentose | Nucleophile |       |
|        |            |         |             | T          | (5R,6S)-Tg |         |             |       |
| RC     | -0.20      | 0.20    | 0.00        |            | -0.19      | 0.19    | 0.00        |       |
| TS     | -0.84      | 0.73    | 0.11        |            | -0.84      | 0.68    | 0.15        |       |
| PC     | -0.95      | 0.95    | -           |            | -0.95      | 0.95    | -           |       |
|        |            |         |             | 5,6-diHThy | 5-OH-6HThy |         |             |       |
| RC     | -0.17      | 0.17    | 0.00        |            | -0.18      | 0.18    | 0.00        |       |
| TS     | -0.82      | 0.69    | 0.13        |            | -0.77      | 0.70    | 0.08        |       |
| PC     | -0.94      | 0.94    | -           |            | -0.96      | 0.96    | -           |       |

**Table S5.** The charges in RC, TS, and PC under different reaction pathways excision of protonated thymine and its damaged derivatives

| Model5      | Nucleobase | Pentose | Nucleophile | Asp  | Nucleobase  | Pentose | Nucleophile | Asp  |
|-------------|------------|---------|-------------|------|-------------|---------|-------------|------|
| TH          |            |         |             |      | (5R,6S)-TgH |         |             |      |
| RC          | 0.59       | 0.41    | -0.03       | 0.02 | 0.66        | 0.34    | -0.03       | 0.03 |
| TS          | 0.07       | 0.92    | -0.01       | 0.02 | 0.12        | 0.86    | -0.02       | 0.04 |
| PC          | -0.03      | 0.97    | -           | 0.06 | 0.11        | 0.58    | -           | 0.41 |
| 5,6-diHThyH |            |         |             |      | 5-OH-6HThyH |         |             |      |
| RC          | 0.61       | 0.38    | -0.03       | 0.03 | 0.60        | 0.39    | -0.03       | 0.04 |
| TS          | -0.01      | 0.83    | 0.12        | 0.06 | -0.01       | 0.83    | 0.12        | 0.06 |
| PC          | -0.02      | 0.81    | -           | 0.21 | -0.03       | 0.84    | -           | 0.19 |
| Model6      | Nucleobase | Pentose | Nucleophile | Asp  | Nucleobase  | Pentose | Nucleophile | Asp  |
| TH          |            |         |             |      | (5R,6S)-TgH |         |             |      |
| RC          | 0.60       | 0.39    | -0.01       | 0.02 | 0.59        | 0.34    | 0.00        | 0.06 |
| TS          | 0.14       | 0.81    | 0.04        | 0.02 | 0.10        | 0.78    | 0.08        | 0.04 |
| PC          | 0.00       | 0.98    | -           | 0.02 | -0.03       | 1.00    | -           | 0.03 |
| 5,6-diHThyH |            |         |             |      | 5-OH-6HThyH |         |             |      |
| RC          | 0.64       | 0.36    | -0.01       | 0.02 | 0.64        | 0.36    | -0.01       | 0.01 |
| TS          | 0.14       | 0.78    | 0.05        | 0.02 | 0.13        | 0.80    | 0.04        | 0.02 |
| PC          | 0.00       | 0.95    | -           | 0.05 | -0.03       | 0.96    | -           | 0.04 |

#### 4. The glycosidic bond lengths, the nucleophilic distances and the reaction angles of the neutral bases in the mono- and di-functional reaction pathways

**Table S6.** Comparison of glycosidic bond lengths of thymine and its damaged derivatives in different reaction pathways(Å)

| pathway | reaction state | T    | (5R,6S)-Tg | 5,6-diHThy | 5-OH-6HThy |
|---------|----------------|------|------------|------------|------------|
| Model 1 | RC             | 1.50 | 1.52       | 1.49       | 1.48       |
|         | TS             | 2.47 | 2.61       | 2.53       | 2.45       |
|         | PC             | 3.12 | 3.14       | 3.15       | 3.08       |
| Model 2 | RC             | 1.49 | 1.50       | 1.48       | 1.49       |
|         | TS             | 2.42 | 2.48       | 2.42       | 2.47       |
|         | PC             | 3.01 | 3.00       | 3.02       | 3.11       |
| Model 3 | RC             | 1.52 | 1.50       | 1.49       | 1.50       |
|         | TS             | 2.32 | 2.34       | 2.32       | 2.30       |
|         | PC             | 2.98 | 2.99       | 3.01       | 2.99       |
| Model 4 | RC             | 1.47 | 1.47       | 1.45       | 1.48       |
|         | TS             | 2.37 | 2.35       | 2.38       | 2.37       |
|         | RC             | 2.99 | 2.86       | 3.00       | 3.00       |

**Table S7.** Comparison of nucleophilic distances of thymine and its damaged derivatives in different reaction pathways(Å)

| pathway | reaction state | T    | (5R,6S)-Tg | 5,6-diHThy | 5-OH-6HThy |
|---------|----------------|------|------------|------------|------------|
| Model 1 | RC             | 3.04 | 3.21       | 3.12       | 3.04       |
|         | TS             | 2.25 | 2.15       | 2.08       | 2.13       |
|         | PC             | 1.43 | 1.45       | 1.45       | 1.43       |
| Model 2 | RC             | 3.08 | 3.06       | 3.09       | 3.04       |
|         | TS             | 2.19 | 2.10       | 2.10       | 2.34       |
|         | PC             | 1.42 | 1.43       | 1.41       | 1.42       |
| Model 3 | RC             | 3.00 | 3.04       | 3.05       | 3.02       |
|         | TS             | 2.28 | 2.21       | 2.21       | 2.29       |
|         | PC             | 1.50 | 1.52       | 1.50       | 1.58       |
| Model 4 | RC             | 3.02 | 3.05       | 3.06       | 3.02       |
|         | TS             | 2.23 | 2.12       | 2.18       | 2.31       |
|         | PC             | 1.54 | 1.55       | 1.54       | 1.55       |

**Table S8.** Comparison of reaction angles of thymine and its damaged derivatives in different reaction pathways (°)

| pathway | reaction state | T      | (5R,6S)-Tg | 5,6-diHThy | 5-OH-6HThy |
|---------|----------------|--------|------------|------------|------------|
| Model 1 | RC             | 161.23 | 154.73     | 157.73     | 158.97     |
|         | TS             | 158.20 | 158.55     | 158.09     | 158.72     |
|         | PC             | 157.10 | 160.73     | 154.89     | 153.47     |
| Model 2 | RC             | 152.12 | 160.48     | 149.86     | 147.54     |
|         | TS             | 151.64 | 151.00     | 154.46     | 142.98     |
|         | PC             | 148.12 | 146.66     | 150.91     | 134.91     |
| Model 3 | RC             | 152.45 | 149.77     | 146.25     | 153.68     |
|         | TS             | 153.33 | 154.36     | 155.67     | 152.65     |
|         | PC             | 147.19 | 150.74     | 153.05     | 150.09     |
| Model 4 | RC             | 147.79 | 146.80     | 145.25     | 158.75     |
|         | TS             | 151.15 | 155.91     | 149.58     | 148.20     |
|         | PC             | 143.60 | 152.11     | 142.97     | 139.20     |

## 5. Cartesian coordinates for the structures of RC, TS and PC of neutral bases in the mono- and di-functional reaction pathways.

**Table S9.** Cartesian coordinates for the optimized T structures of the monofunctional pathway (Asp-H<sub>2</sub>O) at M06-2X/6-31+G(d)

T RC:

| Atoms | Coordinates (Angstroms) |           |           |
|-------|-------------------------|-----------|-----------|
|       | X                       | Y         | Z         |
| O     | -0.666219               | 0.713935  | 2.300935  |
| C     | 0.748743                | 0.726398  | 2.171712  |
| C     | 1.169726                | 0.682232  | 0.714822  |
| O     | 0.625728                | -0.504142 | 0.130246  |
| C     | 0.609857                | 1.851620  | -0.100094 |
| O     | 1.558714                | 2.890943  | -0.136216 |
| C     | 0.301744                | 1.194924  | -1.452042 |
| C     | -0.057386               | -0.234595 | -1.058925 |
| C     | -4.197745               | -0.918518 | -0.030139 |
| C     | -2.372549               | 0.586294  | -0.475382 |
| H     | 1.191051                | -0.118722 | 2.716434  |
| H     | 1.115334                | 1.658077  | 2.619252  |
| H     | 2.265334                | 0.660551  | 0.616960  |
| H     | -0.304073               | 2.238695  | 0.382191  |
| H     | -0.467406               | 1.687596  | -2.053516 |
| H     | 1.228279                | 1.124947  | -2.031436 |
| C     | 1.089309                | 4.029341  | -0.807050 |
| H     | 1.848760                | 4.807079  | -0.698400 |
| H     | 0.934503                | 3.830981  | -1.877913 |
| H     | 0.140429                | 4.385912  | -0.372546 |
| C     | -1.206716               | -0.566633 | 2.558517  |
| H     | -0.958416               | -0.893173 | 3.579840  |
| H     | -2.294128               | -0.476981 | 2.470589  |
| H     | -0.837693               | -1.309470 | 1.843432  |
| O     | 2.741347                | -0.516189 | -2.208255 |
| H     | 3.085511                | -1.403976 | -1.998191 |
| H     | 3.251621                | -0.024251 | -1.516784 |
| H     | 0.243577                | -0.970676 | -1.805663 |
| C     | 4.743034                | -0.962865 | 0.152638  |
| O     | 4.238909                | 0.186611  | -0.031910 |

## Continued T RC

| Atoms | Coordinates (Angstroms) |           |           |
|-------|-------------------------|-----------|-----------|
|       | X                       | Y         | Z         |
| O     | 4.550666                | -1.988478 | -0.535629 |
| C     | 5.675373                | -1.078069 | 1.372057  |
| H     | 6.170109                | -2.052026 | 1.400979  |
| H     | 6.419776                | -0.275855 | 1.346125  |
| H     | 5.085452                | -0.944526 | 2.286294  |
| O     | -5.336668               | -1.215963 | 0.304323  |
| N     | -3.280351               | -1.905091 | -0.382061 |
| N     | -1.526419               | -0.435283 | -0.832499 |
| C     | -4.564993               | 1.574168  | 0.261110  |
| H     | -4.031579               | 2.525852  | 0.189936  |
| H     | -4.940465               | 1.461372  | 1.283161  |
| H     | -5.438986               | 1.608947  | -0.397093 |
| C     | -3.663686               | 0.433553  | -0.103334 |
| H     | -3.604125               | -2.865418 | -0.338537 |
| C     | -1.954611               | -1.755540 | -0.770365 |
| O     | -1.257922               | -2.713620 | -1.034918 |
| H     | -1.938473               | 1.577165  | -0.519018 |

## T TS:

| Atoms | Coordinates (Angstroms) |           |           |
|-------|-------------------------|-----------|-----------|
|       | X                       | Y         | Z         |
| O     | -0.643703               | 0.677526  | 2.204701  |
| C     | 0.762072                | 0.696535  | 2.157716  |
| C     | 1.309034                | 0.704281  | 0.745595  |
| O     | 0.983625                | -0.569406 | 0.102954  |
| C     | 0.683536                | 1.742462  | -0.187429 |
| O     | 1.441030                | 2.924384  | -0.113614 |
| C     | 0.712385                | 1.031628  | -1.551712 |
| C     | 0.681516                | -0.401069 | -1.128210 |
| C     | -4.369329               | -0.941085 | 0.027605  |
| C     | -2.665434               | 0.618819  | -0.631611 |
| H     | 1.191191                | -0.148135 | 2.716438  |
| H     | 1.095699                | 1.627311  | 2.632022  |
| H     | 2.404877                | 0.780605  | 0.732015  |
| H     | -0.351888               | 1.940172  | 0.123457  |
| H     | -0.122823               | 1.255185  | -2.215661 |
| H     | 1.664010                | 1.224867  | -2.058682 |
| C     | 0.881756                | 3.968482  | -0.872020 |
| H     | 1.485145                | 4.859263  | -0.687105 |
| H     | 0.901935                | 3.738670  | -1.947016 |
| H     | -0.158684               | 4.163378  | -0.570829 |

## Continued T TS

| Atoms | Coordinates (Angstroms) |           |           |
|-------|-------------------------|-----------|-----------|
|       | X                       | Y         | Z         |
| C     | -1.209731               | -0.621522 | 2.283851  |
| H     | -1.027185               | -1.052751 | 3.279182  |
| H     | -2.285054               | -0.503935 | 2.129766  |
| H     | -0.806633               | -1.290997 | 1.517502  |
| O     | 2.725155                | -0.826586 | -2.086640 |
| H     | 3.061985                | -1.717887 | -1.872126 |
| H     | 3.308523                | -0.316953 | -1.444687 |
| H     | 0.387633                | -1.277178 | -1.686249 |
| C     | 4.732823                | -1.032760 | 0.201471  |
| O     | 4.208253                | 0.089035  | -0.105967 |
| O     | 4.554147                | -2.114819 | -0.391715 |
| C     | 5.653066                | -1.012249 | 1.426612  |
| H     | 6.115007                | -1.989043 | 1.583596  |
| H     | 6.423971                | -0.246492 | 1.295238  |
| H     | 5.069337                | -0.736636 | 2.312072  |
| O     | -5.476420               | -1.304846 | 0.432530  |
| N     | -3.386453               | -1.878508 | -0.276614 |
| N     | -1.743525               | -0.324175 | -0.916919 |
| C     | -4.912996               | 1.529130  | 0.123553  |
| H     | -4.457249               | 2.505406  | -0.075357 |
| H     | -5.232134               | 1.505173  | 1.172284  |
| H     | -5.822437               | 1.439404  | -0.482548 |
| C     | -3.944331               | 0.424917  | -0.176150 |
| H     | -3.631798               | -2.854116 | -0.149900 |
| C     | -2.091620               | -1.625136 | -0.738614 |
| O     | -1.330788               | -2.579041 | -0.947300 |
| H     | -2.330461               | 1.648911  | -0.792213 |

## T PC:

| Atoms | Coordinates (Angstroms) |           |           |
|-------|-------------------------|-----------|-----------|
|       | X                       | Y         | Z         |
| O     | -0.592832               | 0.677677  | 2.235668  |
| C     | 0.807887                | 0.780040  | 2.206452  |
| C     | 1.403822                | 0.797168  | 0.806813  |
| O     | 1.294896                | -0.487484 | 0.210092  |
| C     | 0.695492                | 1.738687  | -0.163260 |
| O     | 1.248449                | 3.034923  | -0.014548 |
| C     | 0.953413                | 1.089914  | -1.527688 |
| C     | 1.217807                | -0.378763 | -1.196860 |
| C     | -4.418025               | -0.929528 | 0.065402  |



## Continued T PC

| Atoms | Coordinates (Angstroms) |           |           |
|-------|-------------------------|-----------|-----------|
|       | X                       | Y         | Z         |
| C     | -2.837544               | 0.746051  | -0.609013 |
| H     | 1.271958                | -0.033030 | 2.788796  |
| H     | 1.059686                | 1.735273  | 2.683660  |
| H     | 2.462656                | 1.099955  | 0.882646  |
| H     | -0.377988               | 1.752619  | 0.065394  |
| H     | 0.110314                | 1.179228  | -2.215335 |
| H     | 1.856002                | 1.528775  | -1.969912 |
| C     | 0.541241                | 4.001189  | -0.748003 |
| H     | 1.002047                | 4.969789  | -0.543246 |
| H     | 0.588265                | 3.802274  | -1.828865 |
| H     | -0.515769               | 4.031061  | -0.445280 |
| C     | -1.091985               | -0.648611 | 2.150739  |
| H     | -0.820227               | -1.209490 | 3.059480  |
| H     | -2.180172               | -0.565797 | 2.085666  |
| H     | -0.709636               | -1.171515 | 1.270641  |
| O     | 2.478616                | -0.737108 | -1.775583 |
| H     | 2.661926                | -1.669515 | -1.560959 |
| H     | 3.755729                | -0.110699 | -0.912005 |
| H     | 0.443174                | -1.070644 | -1.529875 |
| C     | 4.914361                | -1.164472 | 0.146956  |
| O     | 4.497042                | 0.032999  | -0.251991 |
| O     | 4.547705                | -2.205408 | -0.352377 |
| C     | 5.891753                | -1.077519 | 1.292779  |
| H     | 6.324177                | -2.061281 | 1.480660  |
| H     | 6.676388                | -0.348273 | 1.066070  |
| H     | 5.360580                | -0.728982 | 2.185565  |
| O     | -5.481948               | -1.380360 | 0.510648  |
| N     | -3.404986               | -1.788992 | -0.344775 |
| N     | -1.882964               | -0.114427 | -1.005026 |
| C     | -5.076604               | 1.498192  | 0.332824  |
| H     | -4.691369               | 2.504599  | 0.130217  |
| H     | -5.305897               | 1.428026  | 1.404069  |
| H     | -6.029251               | 1.376602  | -0.198619 |
| C     | -4.078109               | 0.461139  | -0.085202 |
| H     | -3.586639               | -2.782131 | -0.255403 |
| C     | -2.152697               | -1.437071 | -0.871294 |
| O     | -1.367369               | -2.351576 | -1.167010 |
| H     | -2.570491               | 1.802909  | -0.725333 |

**Table S10.** Cartesian coordinates for the optimized (5R,6S)-Tg structures of the monofunctional pathway (Asp-H<sub>2</sub>O) at M06-2X/6-31+G(d)

(5R,6S)-Tg RC:

| Atoms | Coordinates (Angstroms) |           |           |
|-------|-------------------------|-----------|-----------|
|       | X                       | Y         | Z         |
| O     | -0.321714               | -0.743879 | 2.637941  |
| C     | 1.064848                | -0.970920 | 2.415406  |
| C     | 1.478409                | -0.631152 | 0.996148  |
| O     | 0.620075                | -1.339408 | 0.095226  |
| C     | 1.343348                | 0.844562  | 0.619830  |
| O     | 2.536922                | 1.511178  | 0.960754  |
| C     | 1.031690                | 0.737598  | -0.872957 |
| C     | 0.137850                | -0.494270 | -0.924448 |
| H     | 1.309358                | -2.018196 | 2.642927  |
| H     | 1.618282                | -0.327585 | 3.109326  |
| H     | 2.523935                | -0.922481 | 0.817653  |
| H     | 0.511815                | 1.323854  | 1.162585  |
| H     | 0.601257                | 1.629694  | -1.321035 |
| H     | 1.960164                | 0.470374  | -1.394048 |
| C     | 2.616231                | 2.806699  | 0.411813  |
| H     | 3.432309                | 3.321512  | 0.925326  |
| H     | 2.845719                | 2.756643  | -0.662317 |
| H     | 1.677129                | 3.361969  | 0.569668  |
| C     | -1.122564               | -1.892480 | 2.451055  |
| H     | -0.916947               | -2.639170 | 3.233531  |
| H     | -2.165985               | -1.571634 | 2.545017  |
| H     | -0.960222               | -2.346382 | 1.467718  |
| O     | 2.714596                | -1.617472 | -2.470529 |
| H     | 3.086202                | -1.868107 | -1.597657 |
| H     | 3.225873                | -0.787826 | -2.604197 |
| H     | 0.221481                | -1.029730 | -1.869668 |
| C     | 4.688059                | 0.213179  | -0.822702 |
| O     | 4.223974                | 0.675344  | -1.902356 |
| O     | 4.431381                | -0.907412 | -0.311459 |
| C     | 5.652521                | 1.111610  | -0.032900 |
| H     | 5.178971                | 1.359456  | 0.923244  |
| H     | 6.574113                | 0.562891  | 0.186687  |
| H     | 5.884648                | 2.028659  | -0.580436 |
| N     | -1.347801               | -0.264513 | -0.720771 |
| C     | -1.866818               | 0.803761  | 0.151798  |
| C     | -3.406091               | 0.927920  | 0.091921  |
| C     | -4.134271               | -0.408417 | 0.073904  |
| O     | -5.320135               | -0.503669 | 0.346986  |

## Continued (5R,6S)-Tg RC

| Atoms | Coordinates (Angstroms) |           |           |
|-------|-------------------------|-----------|-----------|
|       | X                       | Y         | Z         |
| N     | -3.384362               | -1.449258 | -0.366862 |
| C     | -2.056943               | -1.425970 | -0.870925 |
| O     | -1.650791               | -2.446252 | -1.388263 |
| H     | -3.852031               | -2.336876 | -0.520902 |
| H     | -1.550892               | 0.615799  | 1.185917  |
| O     | -1.346633               | 2.052841  | -0.196899 |
| H     | -1.743106               | 2.290160  | -1.053329 |
| C     | -3.902904               | 1.795802  | 1.236839  |
| H     | -3.383203               | 2.756122  | 1.211041  |
| H     | -4.982771               | 1.945470  | 1.149965  |
| H     | -3.708141               | 1.308305  | 2.197693  |
| O     | -3.690298               | 1.524630  | -1.175983 |
| H     | -4.650029               | 1.705836  | -1.218113 |

## (5R,6S)-Tg TS:

| Atoms | Coordinates (Angstroms) |           |           |
|-------|-------------------------|-----------|-----------|
|       | X                       | Y         | Z         |
| C     | -0.471307               | -0.494722 | 2.554401  |
| C     | 0.909035                | -0.768464 | 2.576721  |
| C     | 1.590067                | -0.589585 | 1.237570  |
| C     | 1.036710                | -1.550911 | 0.285744  |
| C     | 1.376958                | 0.761670  | 0.553524  |
| C     | 2.429223                | 1.609742  | 0.951822  |
| C     | 1.366253                | 0.394997  | -0.939613 |
| C     | 0.957338                | -1.037621 | -0.890415 |
| H     | 1.097723                | -1.782411 | 2.960640  |
| H     | 1.373825                | -0.050330 | 3.262918  |
| H     | 2.666178                | -0.792446 | 1.310075  |
| H     | 0.409482                | 1.199618  | 0.836478  |
| H     | 0.648804                | 0.966889  | -1.526866 |
| H     | 2.378716                | 0.484743  | -1.354840 |
| C     | 2.385819                | 2.862512  | 0.304459  |
| H     | 3.138941                | 3.493889  | 0.781756  |
| H     | 2.631072                | 2.760902  | -0.761482 |
| H     | 1.393477                | 3.324336  | 0.407885  |
| C     | -1.281941               | -1.629643 | 2.301133  |
| H     | -1.186157               | -2.354796 | 3.123685  |
| H     | -2.314820               | -1.275064 | 2.257657  |
| H     | -1.029941               | -2.113976 | 1.352421  |
| C     | 2.748503                | -1.940712 | -1.765685 |

## Continued (5R,6S)-Tg TS

| Atoms | Coordinates (Angstroms) |           |           |
|-------|-------------------------|-----------|-----------|
|       | X                       | Y         | Z         |
| H     | 3.371873                | -1.832794 | -0.986424 |
| H     | 3.172562                | -1.290748 | -2.358949 |
| H     | 0.428665                | -1.624200 | -1.628654 |
| C     | 4.792511                | 0.002555  | -0.568920 |
| C     | 4.461383                | 0.299190  | -1.743995 |
| C     | 4.419886                | -1.032170 | 0.065090  |
| C     | 5.681054                | 0.976791  | 0.201304  |
| H     | 5.060135                | 1.457927  | 0.965832  |
| H     | 6.482371                | 0.435699  | 0.713005  |
| H     | 6.097351                | 1.736788  | -0.463764 |
| N     | -1.486904               | -0.225825 | -0.744227 |
| C     | -2.103480               | 0.890276  | -0.095224 |
| C     | -3.626780               | 1.019747  | -0.310166 |
| C     | -4.326117               | -0.339698 | -0.202898 |
| C     | -5.541921               | -0.416173 | -0.045272 |
| N     | -3.520376               | -1.408949 | -0.376826 |
| C     | -2.136721               | -1.363251 | -0.827675 |
| C     | -1.701448               | -2.454094 | -1.236102 |
| H     | -3.961775               | -2.317671 | -0.471571 |
| H     | -1.922091               | 0.863266  | 0.993007  |
| C     | -1.489782               | 2.098355  | -0.521616 |
| H     | -1.695944               | 2.167743  | -1.468960 |
| C     | -4.240698               | 2.017623  | 0.658502  |
| H     | -3.733934               | 2.979331  | 0.542658  |
| H     | -5.311295               | 2.128251  | 0.461270  |
| H     | -4.123204               | 1.672565  | 1.691571  |
| C     | -3.806585               | 1.451807  | -1.661478 |
| H     | -4.758132               | 1.455963  | -1.845067 |

## (5R,6S)-Tg PC:

| Atoms | Coordinates (Angstroms) |           |           |
|-------|-------------------------|-----------|-----------|
|       | X                       | Y         | Z         |
| O     | -0.246406               | -0.806401 | 2.496797  |
| C     | 1.147212                | -0.985355 | 2.440875  |
| C     | 1.772410                | -0.705703 | 1.084640  |
| O     | 1.326565                | -1.668406 | 0.137796  |
| C     | 1.423375                | 0.655220  | 0.483206  |
| O     | 2.432235                | 1.576547  | 0.881012  |
| C     | 1.378691                | 0.395895  | -1.027883 |
| C     | 1.313590                | -1.132886 | -1.151239 |

## Continued (5R,6S)-Tg PC

| Atoms | Coordinates (Angstroms) |           |           |
|-------|-------------------------|-----------|-----------|
|       | X                       | Y         | Z         |
| H     | 1.415475                | -2.005806 | 2.760532  |
| H     | 1.582975                | -0.274973 | 3.154255  |
| H     | 2.866385                | -0.760746 | 1.201227  |
| H     | 0.444704                | 1.001355  | 0.838335  |
| H     | 0.496240                | 0.844628  | -1.484819 |
| H     | 2.295277                | 0.778248  | -1.492012 |
| C     | 2.122716                | 2.895668  | 0.489001  |
| H     | 2.889703                | 3.549148  | 0.914621  |
| H     | 2.133113                | 2.998979  | -0.606121 |
| H     | 1.130773                | 3.193651  | 0.858314  |
| C     | -0.996560               | -1.931386 | 2.066683  |
| H     | -0.791186               | -2.792043 | 2.723821  |
| H     | -2.050710               | -1.656389 | 2.158282  |
| H     | -0.777397               | -2.199356 | 1.029912  |
| O     | 2.491214                | -1.653299 | -1.824009 |
| H     | 3.884664                | -1.316508 | -0.964614 |
| H     | 2.635918                | -1.129329 | -2.628307 |
| H     | 0.420159                | -1.509851 | -1.655703 |
| C     | 4.948972                | 0.267896  | -0.947228 |
| O     | 4.601458                | 0.622591  | -2.058111 |
| O     | 4.613536                | -0.901631 | -0.411000 |
| C     | 5.767972                | 1.113073  | -0.008918 |
| H     | 5.074161                | 1.533105  | 0.728988  |
| H     | 6.502460                | 0.501745  | 0.521517  |
| H     | 6.254005                | 1.919331  | -0.559539 |
| N     | -1.598020               | -0.061849 | -0.680498 |
| C     | -2.163472               | 0.911295  | 0.197242  |
| C     | -3.699415               | 1.047330  | 0.132475  |
| C     | -4.367762               | -0.331794 | 0.111308  |
| O     | -5.571236               | -0.455603 | 0.338494  |
| N     | -3.556377               | -1.348282 | -0.242769 |
| C     | -2.228166               | -1.196400 | -0.851479 |
| O     | -1.849331               | -2.209621 | -1.465535 |
| H     | -3.991245               | -2.247612 | -0.420978 |
| H     | -1.894646               | 0.707309  | 1.249002  |
| O     | -1.587944               | 2.185012  | -0.070854 |
| H     | -1.749781               | 2.330882  | -1.017168 |
| C     | -4.234809               | 1.886731  | 1.281328  |
| H     | -3.755486               | 2.868965  | 1.249182  |
| H     | -5.320966               | 1.993069  | 1.198968  |
| H     | -4.014086               | 1.410669  | 2.243096  |

Continued (5R,6S)-Tg PC

| Atoms | Coordinates (Angstroms) |          |           |
|-------|-------------------------|----------|-----------|
|       | X                       | Y        | Z         |
| O     | -4.011311               | 1.661839 | -1.120948 |
| H     | -4.973228               | 1.619000 | -1.230609 |

**Table S11.** Cartesian coordinates for the optimized 5,6-diHThy structures of the monofunctional pathway (Asp-H<sub>2</sub>O) at M06-2X/6-31+G(d)

5,6-diHThy RC:

| Atoms | Coordinates (Angstroms) |           |           |
|-------|-------------------------|-----------|-----------|
|       | X                       | Y         | Z         |
| O     | -0.999348               | 0.153847  | 2.425557  |
| C     | 0.410631                | -0.000627 | 2.492869  |
| C     | 1.053151                | -0.126746 | 1.124369  |
| O     | 0.441288                | -1.201683 | 0.406390  |
| C     | 0.899525                | 1.108640  | 0.236418  |
| O     | 1.965376                | 1.991388  | 0.493478  |
| C     | 0.864698                | 0.470061  | -1.156308 |
| C     | 0.060126                | -0.792688 | -0.889128 |
| H     | 0.660179                | -0.877573 | 3.106709  |
| H     | 0.815556                | 0.891316  | 2.986209  |
| H     | 2.130032                | -0.324797 | 1.225645  |
| H     | -0.049565               | 1.629639  | 0.468460  |
| H     | 0.462052                | 1.095907  | -1.957182 |
| H     | 1.883905                | 0.171034  | -1.426211 |
| C     | 2.060190                | 3.032432  | -0.447319 |
| H     | 2.805751                | 3.736919  | -0.068527 |
| H     | 2.393242                | 2.652041  | -1.423334 |
| H     | 1.092758                | 3.554805  | -0.559415 |
| C     | -1.703024               | -1.068869 | 2.540320  |
| H     | -1.552126               | -1.505508 | 3.538860  |
| H     | -2.767463               | -0.840861 | 2.421565  |
| H     | -1.386272               | -1.789865 | 1.779714  |
| O     | 2.782046                | -2.130928 | -1.604811 |
| H     | 2.987104                | -2.059426 | -0.656038 |
| H     | 3.316057                | -1.370539 | -1.920397 |
| H     | 0.293554                | -1.614447 | -1.566692 |
| C     | 4.466279                | 0.281314  | -0.430760 |
| O     | 4.156063                | 0.315717  | -1.655553 |
| O     | 4.138830                | -0.602461 | 0.400721  |
| C     | 5.315816                | 1.442139  | 0.108171  |
| H     | 6.219742                | 1.050955  | 0.575130  |
| H     | 5.581503                | 2.143142  | -0.684357 |
| H     | 4.743271                | 1.958262  | 0.880344  |
| N     | -1.412748               | -0.554941 | -0.922114 |
| C     | -2.068606               | 0.730920  | -1.133186 |
| H     | -2.535827               | 0.754664  | -2.130834 |
| C     | -3.128988               | 0.998741  | -0.068122 |
| C     | -3.867170               | 2.313071  | -0.294372 |

## Continued 5,6-diHThy RC

| Atoms | Coordinates (Angstroms) |           |           |
|-------|-------------------------|-----------|-----------|
|       | X                       | Y         | Z         |
| H     | -4.346759               | 2.326797  | -1.280541 |
| H     | -4.646816               | 2.445872  | 0.459118  |
| H     | -3.168296               | 3.154747  | -0.235909 |
| C     | -4.099379               | -0.165675 | -0.037058 |
| O     | -5.247585               | -0.093643 | 0.363718  |
| N     | -3.575775               | -1.349365 | -0.513082 |
| C     | -2.203686               | -1.643827 | -0.736282 |
| O     | -1.844122               | -2.806199 | -0.740420 |
| H     | -4.153678               | -2.175958 | -0.399404 |
| H     | -2.618502               | 1.011530  | 0.907274  |
| H     | -1.326339               | 1.524751  | -1.106153 |

## 5,6-diHThy TS:

| Atoms | Coordinates (Angstroms) |           |           |
|-------|-------------------------|-----------|-----------|
|       | X                       | Y         | Z         |
| O     | -1.005042               | 0.448951  | 2.371381  |
| C     | 0.365231                | 0.183401  | 2.522185  |
| C     | 1.102570                | -0.098697 | 1.232749  |
| O     | 0.618516                | -1.331574 | 0.624236  |
| C     | 0.934861                | 0.927804  | 0.114488  |
| O     | 1.872101                | 1.955871  | 0.327284  |
| C     | 1.169944                | 0.077907  | -1.145231 |
| C     | 0.726662                | -1.269383 | -0.662911 |
| H     | 0.525363                | -0.649156 | 3.224594  |
| H     | 0.825137                | 1.082980  | 2.948457  |
| H     | 2.172027                | -0.231884 | 1.441552  |
| H     | -0.093133               | 1.323472  | 0.126726  |
| H     | 0.588174                | 0.375706  | -2.017321 |
| H     | 2.241348                | 0.065816  | -1.380908 |
| C     | 1.872564                | 2.912195  | -0.706312 |
| H     | 2.558946                | 3.707212  | -0.406515 |
| H     | 2.223619                | 2.473710  | -1.649659 |
| H     | 0.867765                | 3.336565  | -0.853518 |
| C     | -1.817295               | -0.715500 | 2.400815  |
| H     | -1.660162               | -1.262393 | 3.342911  |
| H     | -2.852733               | -0.371335 | 2.363732  |
| H     | -1.610469               | -1.383315 | 1.559043  |
| O     | 2.545689                | -2.325869 | -0.902689 |
| H     | 3.086867                | -1.943422 | -0.140904 |
| H     | 3.070492                | -1.940033 | -1.623156 |
| H     | 0.282245                | -2.079359 | -1.220982 |



## Continued 5,6-diHThy TS

| Atoms | Coordinates (Angstroms) |           |           |
|-------|-------------------------|-----------|-----------|
|       | X                       | Y         | Z         |
| C     | 4.580585                | -0.165606 | -0.223104 |
| O     | 4.368486                | -0.274084 | -1.456230 |
| O     | 4.084549                | -0.900043 | 0.686856  |
| C     | 5.461592                | 0.989054  | 0.250011  |
| H     | 5.897770                | 0.783736  | 1.230458  |
| H     | 6.238371                | 1.211025  | -0.485629 |
| H     | 4.812419                | 1.868281  | 0.344054  |
| N     | -1.594263               | -0.522646 | -1.257889 |
| C     | -2.263963               | 0.726992  | -1.535653 |
| H     | -2.846535               | 0.678625  | -2.475996 |
| C     | -3.207171               | 1.167399  | -0.411844 |
| C     | -3.907215               | 2.491618  | -0.685207 |
| H     | -4.494692               | 2.434502  | -1.609199 |
| H     | -4.590843               | 2.746659  | 0.128362  |
| H     | -3.169495               | 3.294521  | -0.796097 |
| C     | -4.211933               | 0.051268  | -0.173438 |
| O     | -5.331466               | 0.232276  | 0.293230  |
| N     | -3.743513               | -1.185897 | -0.508404 |
| C     | -2.357744               | -1.499573 | -0.816297 |
| O     | -2.026244               | -2.680091 | -0.598996 |
| H     | -4.304641               | -1.981940 | -0.225472 |
| H     | -2.609107               | 1.238935  | 0.510573  |
| H     | -1.499148               | 1.504126  | -1.693131 |

## 5,6-diHThy PC:

| Atoms | Coordinates (Angstroms) |           |           |
|-------|-------------------------|-----------|-----------|
|       | X                       | Y         | Z         |
| O     | -0.908286               | 0.138773  | 2.399982  |
| C     | 0.482931                | 0.030952  | 2.562651  |
| C     | 1.276044                | -0.127241 | 1.275990  |
| O     | 1.003654                | -1.392397 | 0.688670  |
| C     | 0.953581                | 0.896364  | 0.189826  |
| O     | 1.797439                | 2.022634  | 0.387860  |
| C     | 1.215299                | 0.134667  | -1.114712 |
| C     | 1.156344                | -1.342737 | -0.699356 |
| H     | 0.725498                | -0.806396 | 3.237702  |
| H     | 0.811901                | 0.964036  | 3.036583  |
| H     | 2.345610                | -0.041387 | 1.525052  |
| H     | -0.102537               | 1.195913  | 0.258073  |
| H     | 0.454399                | 0.331151  | -1.870173 |
| H     | 2.214330                | 0.387179  | -1.488262 |

## Continued 5,6-diHThy PC

| Atoms | Coordinates (Angstroms) |           |           |
|-------|-------------------------|-----------|-----------|
|       | X                       | Y         | Z         |
| C     | 1.488506                | 3.080338  | -0.484516 |
| H     | 2.158387                | 3.909379  | -0.243401 |
| H     | 1.637706                | 2.790695  | -1.532720 |
| H     | 0.447719                | 3.407707  | -0.355576 |
| C     | -1.579670               | -1.100928 | 2.209649  |
| H     | -1.320047               | -1.798055 | 3.024713  |
| H     | -2.650927               | -0.881725 | 2.255006  |
| H     | -1.331709               | -1.562325 | 1.248283  |
| O     | 2.409268                | -2.016409 | -0.993365 |
| H     | 3.674510                | -1.291526 | -0.188768 |
| H     | 2.605677                | -1.883589 | -1.934394 |
| H     | 0.332124                | -1.902860 | -1.149489 |
| C     | 4.733647                | 0.261434  | -0.550470 |
| O     | 4.594942                | 0.196019  | -1.756586 |
| O     | 4.298665                | -0.669332 | 0.293198  |
| C     | 5.371610                | 1.422963  | 0.166799  |
| H     | 6.026858                | 1.071116  | 0.967524  |
| H     | 5.920674                | 2.044596  | -0.540705 |
| H     | 4.558312                | 2.003580  | 0.620949  |
| N     | -1.741923               | -0.304690 | -1.351160 |
| C     | -2.501337               | 0.922918  | -1.330507 |
| H     | -3.153094               | 1.015440  | -2.223690 |
| C     | -3.381397               | 1.096347  | -0.087885 |
| C     | -4.186751               | 2.389251  | -0.087387 |
| H     | -4.836777               | 2.437782  | -0.969513 |
| H     | -4.823819               | 2.452977  | 0.798669  |
| H     | -3.515012               | 3.255314  | -0.107726 |
| C     | -4.287343               | -0.117539 | 0.036012  |
| O     | -5.382643               | -0.094361 | 0.593677  |
| N     | -3.757839               | -1.243818 | -0.509700 |
| C     | -2.387837               | -1.391331 | -1.003138 |
| O     | -1.978635               | -2.570310 | -1.014174 |
| H     | -4.239069               | -2.117421 | -0.327377 |
| H     | -2.717910               | 1.069097  | 0.792488  |
| H     | -1.800347               | 1.772065  | -1.383118 |

**Table S12.** Cartesian coordinates for the optimized 5-OH-6HThy structures of the monofunctional pathway (Asp-H<sub>2</sub>O) at M06-2X/6-31+G(d)

5-OH-6HThy RC:

| Atoms | Coordinates (Angstroms) |           |           |
|-------|-------------------------|-----------|-----------|
|       | X                       | Y         | Z         |
| O     | -0.278786               | 0.507653  | 2.647717  |
| C     | 1.114780                | 0.594030  | 2.375410  |
| C     | 1.403156                | 0.601399  | 0.884944  |
| O     | 0.802821                | -0.562306 | 0.312464  |
| C     | 0.775680                | 1.784251  | 0.146012  |
| O     | 1.664316                | 2.876656  | 0.160667  |
| C     | 0.494381                | 1.172098  | -1.231785 |
| C     | 0.112920                | -0.262188 | -0.876606 |
| H     | 1.643895                | -0.240918 | 2.854919  |
| H     | 1.477404                | 1.531908  | 2.812365  |
| H     | 2.489068                | 0.591909  | 0.697576  |
| H     | -0.156208               | 2.087684  | 0.655655  |
| H     | -0.259397               | 1.680599  | -1.839509 |
| H     | 1.432590                | 1.114879  | -1.792604 |
| C     | 1.119398                | 4.027461  | -0.426819 |
| H     | 1.854272                | 4.825764  | -0.310328 |
| H     | 0.919357                | 3.881403  | -1.498205 |
| H     | 0.181911                | 4.324696  | 0.070264  |
| C     | -0.736173               | -0.813926 | 2.857071  |
| H     | -0.301467               | -1.231422 | 3.777317  |
| H     | -1.823395               | -0.758259 | 2.980216  |
| H     | -0.488323               | -1.466111 | 2.013484  |
| O     | 2.866069                | -0.618447 | -2.121251 |
| H     | 3.191586                | -1.496969 | -1.852552 |
| H     | 3.427504                | -0.088167 | -1.502940 |
| H     | 0.418140                | -0.978747 | -1.636647 |
| C     | 5.005179                | -0.926235 | 0.137197  |
| O     | 4.499817                | 0.214380  | -0.090559 |
| O     | 4.739149                | -1.999262 | -0.446933 |
| C     | 6.046146                | -0.965018 | 1.271140  |
| H     | 6.812167                | -0.202357 | 1.095485  |
| H     | 5.552868                | -0.716685 | 2.218566  |
| H     | 6.508159                | -1.952447 | 1.350498  |
| N     | -1.343021               | -0.437433 | -0.667467 |
| C     | -2.193618               | 0.637441  | -0.175897 |
| H     | -1.842258               | 1.582434  | -0.589966 |
| C     | -3.640341               | 0.480542  | -0.617102 |
| C     | -4.534127               | 1.499337  | 0.075436  |

## Continued 5-OH-6HThy RC

| Atoms | Coordinates (Angstroms) |           |           |
|-------|-------------------------|-----------|-----------|
|       | X                       | Y         | Z         |
| H     | -5.570413               | 1.366672  | -0.247727 |
| H     | -4.501532               | 1.379062  | 1.162709  |
| H     | -4.197670               | 2.507478  | -0.184727 |
| C     | -4.134005               | -0.939663 | -0.333682 |
| O     | -5.320378               | -1.222854 | -0.300016 |
| N     | -3.144495               | -1.867255 | -0.179203 |
| C     | -1.764166               | -1.719640 | -0.506586 |
| O     | -1.093253               | -2.724624 | -0.625137 |
| H     | -3.433663               | -2.837655 | -0.102653 |
| H     | -2.140365               | 0.707303  | 0.920265  |
| O     | -3.670046               | 0.654097  | -2.029898 |
| H     | -4.571486               | 0.476801  | -2.333986 |

## 5-OH-6HThy TS:

| Atoms | Coordinates (Angstroms) |           |           |
|-------|-------------------------|-----------|-----------|
|       | X                       | Y         | Z         |
| O     | -0.128395               | 0.212703  | 2.405313  |
| C     | 1.256499                | 0.357741  | 2.196523  |
| C     | 1.636056                | 0.551434  | 0.743979  |
| O     | 1.308186                | -0.659886 | 0.001008  |
| C     | 0.871446                | 1.643765  | -0.001157 |
| O     | 1.553971                | 2.862141  | 0.171333  |
| C     | 0.846043                | 1.104546  | -1.442834 |
| C     | 0.892994                | -0.370890 | -1.185511 |
| H     | 1.807720                | -0.500463 | 2.609432  |
| H     | 1.574050                | 1.260007  | 2.732554  |
| H     | 2.716935                | 0.713153  | 0.630675  |
| H     | -0.151134               | 1.727797  | 0.391924  |
| H     | -0.041825               | 1.364345  | -2.018944 |
| H     | 1.757718                | 1.407136  | -1.969808 |
| C     | 0.855516                | 3.948312  | -0.385474 |
| H     | 1.414493                | 4.852757  | -0.136628 |
| H     | 0.783617                | 3.861169  | -1.479152 |
| H     | -0.160564               | 4.020743  | 0.030861  |
| C     | -0.586043               | -1.130269 | 2.346183  |
| H     | -0.206847               | -1.695135 | 3.211096  |
| H     | -1.677719               | -1.093497 | 2.391359  |
| H     | -0.284528               | -1.624954 | 1.418458  |
| O     | 2.908630                | -0.636670 | -2.267342 |
| H     | 3.228066                | -1.550964 | -2.159776 |
| H     | 3.560988                | -0.179316 | -1.638874 |

## Continued 5-OH-6HThy TS

| Atoms | Coordinates (Angstroms) |           |           |
|-------|-------------------------|-----------|-----------|
|       | X                       | Y         | Z         |
| H     | 0.483689                | -1.180932 | -1.772641 |
| C     | 5.016053                | -0.846831 | -0.082909 |
| O     | 4.495426                | 0.271787  | -0.412167 |
| O     | 4.943734                | -1.903996 | -0.737620 |
| C     | 5.715828                | -0.879261 | 1.278491  |
| H     | 6.052287                | 0.118922  | 1.569352  |
| H     | 4.986859                | -1.218546 | 2.025794  |
| H     | 6.546509                | -1.588348 | 1.272588  |
| N     | -1.561790               | -0.285647 | -0.695811 |
| C     | -2.425997               | 0.710690  | -0.114140 |
| H     | -2.239770               | 1.680784  | -0.601255 |
| C     | -3.927456               | 0.453413  | -0.234256 |
| C     | -4.741309               | 1.413871  | 0.621519  |
| H     | -5.808797               | 1.194405  | 0.525708  |
| H     | -4.472084               | 1.322686  | 1.678699  |
| H     | -4.549983               | 2.439853  | 0.289945  |
| C     | -4.247567               | -0.998716 | 0.139011  |
| O     | -5.379778               | -1.345928 | 0.466031  |
| N     | -3.209297               | -1.853441 | -0.006018 |
| C     | -1.910352               | -1.543416 | -0.587379 |
| O     | -1.245942               | -2.545691 | -0.912014 |
| H     | -3.403955               | -2.845927 | 0.075180  |
| H     | -2.193828               | 0.854378  | 0.957716  |
| O     | -4.284876               | 0.601313  | -1.610353 |
| H     | -5.202215               | 0.301042  | -1.707239 |

## 5-OH-6HThy PC:

| Atoms | Coordinates (Angstroms) |           |           |
|-------|-------------------------|-----------|-----------|
|       | X                       | Y         | Z         |
| O     | -0.180474               | 0.439344  | 2.563257  |
| C     | 1.198399                | 0.692947  | 2.462517  |
| C     | 1.725511                | 0.780004  | 1.037314  |
| O     | 1.711917                | -0.503379 | 0.432965  |
| C     | 0.893176                | 1.667747  | 0.114949  |
| O     | 1.351119                | 3.003436  | 0.246154  |
| C     | 1.123974                | 1.044569  | -1.264679 |
| C     | 1.452755                | -0.413480 | -0.957901 |
| H     | 1.772904                | -0.070995 | 3.013493  |
| H     | 1.368838                | 1.666490  | 2.938554  |
| H     | 2.755833                | 1.175497  | 1.071112  |
| H     | -0.165464               | 1.596536  | 0.394351  |

## Continued 5-OH-6HThy PC

| Atoms | Coordinates (Angstroms) |           |           |
|-------|-------------------------|-----------|-----------|
|       | X                       | Y         | Z         |
| H     | 0.251507                | 1.106800  | -1.917766 |
| H     | 1.994505                | 1.522608  | -1.733306 |
| C     | 0.519270                | 3.918411  | -0.420056 |
| H     | 0.928091                | 4.916028  | -0.244570 |
| H     | 0.493495                | 3.726196  | -1.502731 |
| H     | -0.509046               | 3.872112  | -0.033237 |
| C     | -0.541588               | -0.927249 | 2.412745  |
| H     | -0.102120               | -1.517528 | 3.231577  |
| H     | -1.631352               | -0.968216 | 2.485237  |
| H     | -0.230346               | -1.337734 | 1.450982  |
| O     | 2.636713                | -0.765188 | -1.679866 |
| H     | 2.851960                | -1.693243 | -1.477531 |
| H     | 3.957011                | -0.110948 | -0.912863 |
| H     | 0.649006                | -1.116097 | -1.186333 |
| C     | 5.181675                | -1.122805 | 0.109048  |
| O     | 4.734597                | 0.059673  | -0.300678 |
| O     | 4.799500                | -2.184562 | -0.342151 |
| C     | 6.206907                | -0.995843 | 1.207556  |
| H     | 6.951065                | -0.239430 | 0.946324  |
| H     | 5.701236                | -0.664445 | 2.119927  |
| H     | 6.681721                | -1.960837 | 1.382471  |
| N     | -1.595616               | -0.174560 | -0.618870 |
| C     | -2.584382               | 0.805599  | -0.250402 |
| H     | -2.325634               | 1.771193  | -0.712943 |
| C     | -4.031607               | 0.513350  | -0.647032 |
| C     | -5.005553               | 1.440496  | 0.069831  |
| H     | -6.030910               | 1.234871  | -0.252588 |
| H     | -4.956774               | 1.300115  | 1.154829  |
| H     | -4.750555               | 2.479030  | -0.168106 |
| C     | -4.383425               | -0.949351 | -0.356168 |
| O     | -5.554182               | -1.332960 | -0.368359 |
| N     | -3.321975               | -1.755157 | -0.155422 |
| C     | -1.924664               | -1.430762 | -0.493302 |
| O     | -1.203676               | -2.442398 | -0.615167 |
| H     | -3.506324               | -2.751391 | -0.097465 |
| H     | -2.576165               | 0.973696  | 0.844955  |
| O     | -4.150612               | 0.687099  | -2.061371 |
| H     | -5.009536               | 0.316397  | -2.318623 |

**Table S13.** Cartesian coordinates for the optimized T structures of the bifunctional pathway (Asp-Lys) at M06-2X/6-31+G(d)

T RC:

| Atoms | Coordinates (Angstroms) |           |           |
|-------|-------------------------|-----------|-----------|
|       | X                       | Y         | Z         |
| O     | -1.671817               | 1.298459  | -2.206296 |
| C     | -1.218312               | 2.557387  | -1.751723 |
| C     | 0.060462                | 2.369803  | -0.951942 |
| O     | -0.199273               | 1.806502  | 0.328414  |
| C     | 1.061450                | 1.432161  | -1.633053 |
| O     | 2.358218                | 1.963860  | -1.432017 |
| C     | 0.787785                | 0.083039  | -0.954669 |
| C     | -0.019837               | 0.429593  | 0.312190  |
| H     | -1.979531               | 3.018995  | -1.108993 |
| H     | -1.018141               | 3.213070  | -2.617894 |
| H     | 0.518623                | 3.350293  | -0.780518 |
| H     | 0.875219                | 1.369636  | -2.717426 |
| H     | 0.195430                | -0.546987 | -1.624133 |
| H     | 1.699247                | -0.450198 | -0.675791 |
| C     | 3.387524                | 1.145678  | -1.952416 |
| H     | 4.310086                | 1.729572  | -1.889790 |
| H     | 3.508802                | 0.214915  | -1.383499 |
| H     | 3.190845                | 0.904932  | -3.010252 |
| C     | -2.965515               | 1.357256  | -2.750406 |
| H     | -2.992352               | 2.011005  | -3.636938 |
| H     | -3.242141               | 0.341726  | -3.043311 |
| H     | -3.681256               | 1.731628  | -2.004515 |
| H     | 0.514129                | 0.126075  | 1.212959  |
| C     | 1.785996                | 2.059313  | 3.336823  |
| H     | 1.842443                | 2.084011  | 4.434546  |
| H     | 0.777308                | 1.727534  | 3.061790  |
| C     | 2.799517                | 1.045490  | 2.801333  |
| H     | 2.554344                | 0.047772  | 3.184764  |
| H     | 3.802623                | 1.303918  | 3.195955  |
| N     | 2.737360                | 0.974850  | 1.352293  |
| H     | 3.169528                | 0.121030  | 0.986019  |
| C     | 2.013898                | 3.458858  | 2.769060  |
| H     | 1.860169                | 3.451547  | 1.684643  |
| H     | 1.316144                | 4.186197  | 3.198317  |
| H     | 3.035932                | 3.806623  | 2.973855  |
| H     | 3.163358                | 1.777690  | 0.898168  |
| C     | 2.877467                | -2.421621 | 0.628648  |
| C     | 3.391852                | -3.869142 | 0.702745  |

## Continued T RC

| Atoms | Coordinates (Angstroms) |           |           |
|-------|-------------------------|-----------|-----------|
|       | X                       | Y         | Z         |
| H     | 3.204999                | -4.356170 | -0.262274 |
| H     | 4.471641                | -3.883362 | 0.876808  |
| H     | 2.869194                | -4.429783 | 1.481951  |
| O     | 1.737187                | -2.195235 | 1.108993  |
| O     | 3.634248                | -1.585386 | 0.066728  |
| C     | -3.502083               | -2.063115 | -0.202611 |
| C     | -1.168027               | -1.698434 | 0.246547  |
| O     | -4.502063               | -2.720342 | -0.475534 |
| N     | -3.591355               | -0.683192 | -0.043306 |
| N     | -1.331427               | -0.330473 | 0.314826  |
| C     | -1.944491               | -4.065924 | -0.069333 |
| H     | -0.892788               | -4.302101 | 0.115348  |
| H     | -2.231392               | -4.455012 | -1.052710 |
| H     | -2.559246               | -4.589944 | 0.671063  |
| C     | -2.162733               | -2.584245 | 0.002343  |
| H     | -4.521491               | -0.282877 | -0.093369 |
| C     | -2.585807               | 0.237704  | 0.253881  |
| O     | -2.881741               | 1.407363  | 0.440206  |
| H     | -0.137646               | -2.023779 | 0.419385  |

## T TS:

| Atoms | Coordinates (Angstroms) |           |           |
|-------|-------------------------|-----------|-----------|
|       | X                       | Y         | Z         |
| O     | 1.385063                | -2.153474 | -1.496213 |
| C     | 0.514758                | -3.050394 | -0.849085 |
| C     | -0.808439               | -2.359114 | -0.577848 |
| O     | -0.729648               | -1.580502 | 0.646778  |
| C     | -1.232622               | -1.355432 | -1.653748 |
| O     | -2.641146               | -1.436612 | -1.774583 |
| C     | -0.710735               | -0.026828 | -1.085078 |
| C     | -0.689736               | -0.306643 | 0.384892  |
| H     | 0.951007                | -3.380509 | 0.102781  |
| H     | 0.324814                | -3.922635 | -1.500722 |
| H     | -1.592138               | -3.102272 | -0.406540 |
| H     | -0.767530               | -1.585709 | -2.621749 |
| H     | 0.317129                | 0.128251  | -1.421605 |
| H     | -1.316285               | 0.850205  | -1.317227 |
| C     | -3.182273               | -0.499842 | -2.691097 |
| H     | -4.233776               | -0.767408 | -2.820737 |
| H     | -3.111396               | 0.531019  | -2.319370 |
| H     | -2.672220               | -0.576241 | -3.663876 |



## Continued T TS

| Atoms | Coordinates (Angstroms) |           |           |
|-------|-------------------------|-----------|-----------|
|       | X                       | Y         | Z         |
| C     | 2.684125                | -2.679044 | -1.645072 |
| H     | 2.674373                | -3.555460 | -2.313896 |
| H     | 3.298953                | -1.892851 | -2.088202 |
| H     | 3.096792                | -2.962065 | -0.668596 |
| H     | -0.685924               | 0.411070  | 1.185428  |
| C     | -2.863246               | -0.700421 | 2.933882  |
| H     | -3.130052               | -0.434743 | 3.965299  |
| H     | -1.777265               | -0.846719 | 2.912162  |
| C     | -3.248271               | 0.461997  | 2.017735  |
| H     | -2.678213               | 1.360541  | 2.279616  |
| H     | -4.316461               | 0.700020  | 2.166897  |
| N     | -2.941868               | 0.165595  | 0.623391  |
| H     | -3.010843               | 1.009236  | 0.040969  |
| C     | -3.551362               | -2.007554 | 2.542944  |
| H     | -3.237476               | -2.329078 | 1.542529  |
| H     | -3.301139               | -2.813989 | 3.240240  |
| H     | -4.643433               | -1.892645 | 2.535393  |
| H     | -3.545003               | -0.553335 | 0.231178  |
| C     | -1.951619               | 3.134532  | -0.456267 |
| C     | -1.781603               | 4.623840  | -0.780715 |
| H     | -1.063773               | 5.095290  | -0.106092 |
| H     | -1.437220               | 4.729002  | -1.815458 |
| H     | -2.751303               | 5.127515  | -0.711807 |
| O     | -1.245623               | 2.642269  | 0.456626  |
| O     | -2.797417               | 2.503620  | -1.160082 |
| C     | 4.262203                | 0.816306  | 0.452578  |
| C     | 1.912040                | 1.320107  | 0.398846  |
| O     | 5.473982                | 1.032141  | 0.338918  |
| N     | 3.810190                | -0.441861 | 0.841061  |
| N     | 1.529942                | 0.076560  | 0.770080  |
| C     | 3.554693                | 3.163193  | -0.181706 |
| H     | 2.647915                | 3.758037  | -0.333967 |
| H     | 4.141524                | 3.175478  | -1.108059 |
| H     | 4.168356                | 3.654513  | 0.583361  |
| C     | 3.198394                | 1.762911  | 0.220204  |
| H     | 4.521732                | -1.132795 | 1.051191  |
| C     | 2.482328                | -0.850405 | 1.021268  |
| O     | 2.271123                | -2.017467 | 1.387053  |
| H     | 1.078522                | 2.013140  | 0.240749  |

T PC:

| Atoms | Coordinates (Angstroms) |           |           |
|-------|-------------------------|-----------|-----------|
|       | X                       | Y         | Z         |
| O     | -1.476448               | 1.243683  | -2.051741 |
| C     | -1.108926               | 2.471325  | -1.464829 |
| C     | 0.332991                | 2.416659  | -0.969428 |
| O     | 0.402180                | 1.967753  | 0.389603  |
| C     | 1.232723                | 1.453812  | -1.743522 |
| O     | 2.563107                | 1.967096  | -1.627117 |
| C     | 1.040764                | 0.160512  | -0.952215 |
| C     | 0.977058                | 0.686329  | 0.472977  |
| H     | -1.769584               | 2.691440  | -0.614529 |
| H     | -1.192776               | 3.272309  | -2.221885 |
| H     | 0.756203                | 3.428065  | -0.996297 |
| H     | 0.956956                | 1.366052  | -2.801955 |
| H     | 0.061541                | -0.267244 | -1.190384 |
| H     | 1.821530                | -0.585634 | -1.095419 |
| C     | 3.545589                | 1.156737  | -2.243453 |
| H     | 4.463616                | 1.748532  | -2.278411 |
| H     | 3.734367                | 0.234311  | -1.679015 |
| H     | 3.246946                | 0.900379  | -3.270461 |
| C     | -2.799198               | 1.262891  | -2.538432 |
| H     | -2.885737               | 1.958433  | -3.390582 |
| H     | -3.034338               | 0.248874  | -2.869472 |
| H     | -3.496291               | 1.558494  | -1.744820 |
| H     | 0.389884                | 0.067141  | 1.147671  |
| C     | 1.625875                | 2.083949  | 3.104191  |
| H     | 1.692438                | 2.000573  | 4.196354  |
| H     | 0.566615                | 1.997910  | 2.838683  |
| C     | 2.401252                | 0.907762  | 2.522626  |
| H     | 2.007992                | -0.052421 | 2.866713  |
| H     | 3.459030                | 0.962488  | 2.805967  |
| N     | 2.361390                | 0.834954  | 1.041371  |
| H     | 2.984563                | -0.048813 | 0.728478  |
| C     | 2.165179                | 3.441044  | 2.654448  |
| H     | 2.006058                | 3.588062  | 1.580899  |
| H     | 1.651837                | 4.258110  | 3.171503  |
| H     | 3.239444                | 3.530937  | 2.865218  |
| H     | 2.778963                | 1.662139  | 0.603783  |
| C     | 3.032024                | -2.204534 | 0.799370  |
| C     | 3.533273                | -3.601245 | 0.454735  |
| H     | 3.428087                | -3.760795 | -0.627910 |
| H     | 4.599232                | -3.680201 | 0.692643  |
| H     | 2.960269                | -4.363559 | 0.991376  |

## Continued T PC

---

| Atoms | Coordinates (Angstroms) |           |           |
|-------|-------------------------|-----------|-----------|
|       | X                       | Y         | Z         |
| O     | 1.993336                | -2.060530 | 1.459570  |
| O     | 3.741717                | -1.234109 | 0.339465  |
| C     | -3.789840               | -2.152370 | -0.365165 |
| C     | -1.584294               | -1.814388 | 0.524230  |
| O     | -4.746054               | -2.778316 | -0.846946 |
| N     | -3.908305               | -0.792796 | -0.098138 |
| N     | -1.744885               | -0.500410 | 0.775226  |
| C     | -2.229877               | -4.141499 | -0.272042 |
| H     | -1.206377               | -4.395441 | 0.027619  |
| H     | -2.358183               | -4.404369 | -1.330346 |
| H     | -2.924383               | -4.777715 | 0.292527  |
| C     | -2.497640               | -2.685603 | -0.029682 |
| H     | -4.805663               | -0.369584 | -0.306624 |
| C     | -2.931867               | 0.057207  | 0.447580  |
| O     | -3.225279               | 1.258264  | 0.582410  |
| H     | -0.599034               | -2.205554 | 0.801796  |

---

**Table S14.** Cartesian coordinates for the optimized (5R,6S)-Tg structures of the bifunctional pathway (Asp-Lys) at M06-2X/6-31+G(d)

(5R,6S)-Tg RC:

| Atoms | Coordinates (Angstroms) |           |           |
|-------|-------------------------|-----------|-----------|
|       | X                       | Y         | Z         |
| O     | -0.845724               | -2.278434 | 2.166468  |
| C     | 0.166476                | -3.125828 | 1.661573  |
| C     | 1.290509                | -2.276754 | 1.092913  |
| O     | 0.945815                | -1.729751 | -0.169494 |
| C     | 1.650709                | -1.080255 | 1.977407  |
| O     | 3.054611                | -0.914038 | 1.912246  |
| C     | 0.811646                | 0.056491  | 1.368509  |
| C     | 0.421536                | -0.445301 | -0.033388 |
| H     | -0.236677               | -3.757622 | 0.858726  |
| H     | 0.552989                | -3.763207 | 2.477367  |
| H     | 2.171695                | -2.908705 | 0.934841  |
| H     | 1.367779                | -1.253342 | 3.028250  |
| H     | -0.080652               | 0.210362  | 1.982259  |
| H     | 1.374673                | 0.988691  | 1.289670  |
| C     | 3.524877                | 0.236981  | 2.579982  |
| H     | 4.614199                | 0.150362  | 2.620028  |
| H     | 3.255704                | 1.163499  | 2.056711  |
| H     | 3.134182                | 0.277534  | 3.610260  |
| C     | -2.050404               | -2.958975 | 2.393887  |
| H     | -1.911964               | -3.782254 | 3.111925  |
| H     | -2.759969               | -2.240375 | 2.814625  |
| H     | -2.449499               | -3.365891 | 1.452995  |
| H     | 0.873215                | 0.180183  | -0.806104 |
| C     | 2.996441                | -0.871531 | -2.738170 |
| H     | 3.102358                | -0.840469 | -3.832098 |
| H     | 1.950194                | -1.107634 | -2.511827 |
| C     | 3.330287                | 0.507446  | -2.165066 |
| H     | 2.609536                | 1.245349  | -2.535267 |
| H     | 4.328743                | 0.814435  | -2.535976 |
| N     | 3.222843                | 0.508522  | -0.714548 |
| H     | 3.125997                | 1.455649  | -0.343668 |
| C     | 3.881925                | -1.971346 | -2.156662 |
| H     | 3.701498                | -2.065075 | -1.081178 |
| H     | 3.671846                | -2.942380 | -2.615997 |
| H     | 4.945672                | -1.747119 | -2.311551 |
| H     | 4.010832                | 0.051853  | -0.263568 |
| C     | 1.456793                | 3.307704  | 0.168777  |
| C     | 0.549505                | 4.478817  | 0.561714  |

## Continued (5R,6S)-Tg RC

| Atoms | Coordinates (Angstroms) |           |           |
|-------|-------------------------|-----------|-----------|
|       | X                       | Y         | Z         |
| H     | -0.496916               | 4.154575  | 0.597857  |
| H     | 0.846186                | 4.898334  | 1.525306  |
| H     | 0.619575                | 5.254926  | -0.208519 |
| O     | 1.102173                | 2.636784  | -0.851276 |
| O     | 2.477643                | 3.089550  | 0.853171  |
| N     | -1.063927               | -0.377950 | -0.256578 |
| C     | -1.516016               | 1.011103  | -0.380524 |
| C     | -3.044133               | 1.137293  | -0.257072 |
| C     | -3.687193               | 0.195619  | -1.278801 |
| O     | -4.706772               | 0.429555  | -1.895604 |
| N     | -3.037179               | -1.010278 | -1.361491 |
| C     | -1.790693               | -1.390536 | -0.800922 |
| O     | -1.508764               | -2.578385 | -0.841570 |
| H     | -3.486517               | -1.750738 | -1.888952 |
| H     | -1.063783               | 1.561488  | 0.456076  |
| O     | -1.154143               | 1.610636  | -1.587874 |
| H     | -0.292931               | 2.106780  | -1.424943 |
| C     | -3.553170               | 0.758370  | 1.130026  |
| H     | -3.117065               | 1.443541  | 1.863742  |
| H     | -4.641941               | 0.860572  | 1.154780  |
| H     | -3.273012               | -0.265881 | 1.389575  |
| O     | -3.410555               | 2.467867  | -0.492567 |
| H     | -2.890122               | 2.750368  | -1.267433 |

## (5R,6S)-Tg TS:

| Atoms | Coordinates (Angstroms) |           |           |
|-------|-------------------------|-----------|-----------|
|       | X                       | Y         | Z         |
| O     | -0.149411               | -2.796189 | 1.733620  |
| C     | 0.668472                | -3.289762 | 0.695257  |
| C     | 1.741375                | -2.263485 | 0.358684  |
| O     | 1.275219                | -1.423550 | -0.730627 |
| C     | 2.078442                | -1.283404 | 1.486019  |
| O     | 3.460348                | -0.977947 | 1.380554  |
| C     | 1.139735                | -0.106032 | 1.183826  |
| C     | 0.944451                | -0.239522 | -0.297982 |
| H     | 0.073801                | -3.460644 | -0.212212 |
| H     | 1.147226                | -4.230422 | 1.016915  |
| H     | 2.645005                | -2.753872 | -0.013727 |
| H     | 1.874295                | -1.717347 | 2.472798  |
| H     | 0.172204                | -0.297464 | 1.652374  |
| H     | 1.528220                | 0.871456  | 1.473176  |

## Continued (5R,6S)-Tg TS

| Atoms | Coordinates (Angstroms) |           |           |
|-------|-------------------------|-----------|-----------|
|       | X                       | Y         | Z         |
| C     | 3.893343                | 0.002707  | 2.305234  |
| H     | 4.985317                | 0.006585  | 2.265113  |
| H     | 3.517557                | 1.003537  | 2.055342  |
| H     | 3.573969                | -0.259193 | 3.325332  |
| C     | -1.429465               | -3.386201 | 1.748617  |
| H     | -1.361181               | -4.462281 | 1.978436  |
| H     | -1.997799               | -2.890154 | 2.538831  |
| H     | -1.928378               | -3.249444 | 0.781988  |
| H     | 0.566255                | 0.485595  | -0.996744 |
| C     | 2.709793                | 0.152988  | -3.154786 |
| H     | 2.753052                | 0.540487  | -4.181058 |
| H     | 1.717224                | -0.291466 | -3.023398 |
| C     | 2.883658                | 1.326328  | -2.190403 |
| H     | 2.065102                | 2.044913  | -2.307710 |
| H     | 3.820381                | 1.857843  | -2.433554 |
| N     | 2.858940                | 0.893799  | -0.795419 |
| H     | 2.778110                | 1.705621  | -0.168445 |
| C     | 3.771338                | -0.928824 | -2.961833 |
| H     | 3.677794                | -1.392172 | -1.972810 |
| H     | 3.669721                | -1.724244 | -3.707606 |
| H     | 4.783125                | -0.510735 | -3.047840 |
| H     | 3.675726                | 0.344300  | -0.536469 |
| C     | 1.133469                | 3.234905  | 0.804479  |
| C     | 0.185127                | 4.083908  | 1.653564  |
| H     | -0.257421               | 3.427637  | 2.410685  |
| H     | 0.739833                | 4.866697  | 2.178577  |
| H     | -0.622067               | 4.516652  | 1.056993  |
| O     | 0.691085                | 2.791886  | -0.294314 |
| O     | 2.271780                | 2.979940  | 1.272156  |
| N     | -1.311726               | -0.469209 | -0.156272 |
| C     | -1.897289               | 0.820398  | 0.084061  |
| C     | -3.421544               | 0.784070  | 0.293716  |
| C     | -4.051352               | 0.066131  | -0.911897 |
| O     | -5.166426               | 0.311383  | -1.341563 |
| N     | -3.269617               | -0.935897 | -1.410437 |
| C     | -1.943650               | -1.290372 | -0.981645 |
| O     | -1.524963               | -2.381140 | -1.409328 |
| H     | -3.667781               | -1.530086 | -2.128608 |
| H     | -1.451774               | 1.235359  | 1.004837  |
| O     | -1.687337               | 1.753086  | -0.971795 |
| H     | -0.853260               | 2.247984  | -0.778046 |

## Continued (5R,6S)-Tg TS

| Atoms | Coordinates (Angstroms) |           |           |
|-------|-------------------------|-----------|-----------|
|       | X                       | Y         | Z         |
| C     | -3.810286               | 0.023600  | 1.556903  |
| H     | -3.357208               | 0.513521  | 2.426514  |
| H     | -4.898802               | 0.039078  | 1.667699  |
| H     | -3.460934               | -1.011590 | 1.510580  |
| O     | -3.916462               | 2.093191  | 0.419547  |
| H     | -3.454853               | 2.603110  | -0.269954 |

## (5R,6S)-Tg PC:

| Atoms | Coordinates (Angstroms) |           |           |
|-------|-------------------------|-----------|-----------|
|       | X                       | Y         | Z         |
| O     | -0.430001               | -2.324409 | 2.463316  |
| C     | 0.278278                | -2.969288 | 1.419875  |
| C     | 1.628585                | -2.276396 | 1.176696  |
| O     | 1.661162                | -1.690576 | -0.137598 |
| C     | 1.912386                | -1.101053 | 2.105862  |
| O     | 3.330267                | -0.899018 | 2.079670  |
| C     | 1.159523                | 0.016261  | 1.388445  |
| C     | 1.477005                | -0.300949 | -0.066108 |
| H     | -0.301447               | -2.926039 | 0.485870  |
| H     | 0.441286                | -4.024113 | 1.699586  |
| H     | 2.452558                | -2.995477 | 1.208109  |
| H     | 1.575069                | -1.270499 | 3.133449  |
| H     | 0.083408                | -0.137171 | 1.516844  |
| H     | 1.446458                | 1.026732  | 1.684833  |
| C     | 3.759422                | 0.195325  | 2.866650  |
| H     | 4.847048                | 0.121476  | 2.944143  |
| H     | 3.493993                | 1.159734  | 2.413128  |
| H     | 3.325388                | 0.140302  | 3.875394  |
| C     | -1.804147               | -2.645691 | 2.435915  |
| H     | -1.957400               | -3.713619 | 2.664159  |
| H     | -2.288207               | -2.041691 | 3.208880  |
| H     | -2.232060               | -2.418448 | 1.453207  |
| H     | 0.706484                | 0.018224  | -0.766902 |
| C     | 2.983091                | -0.914279 | -2.652973 |
| H     | 3.102034                | -0.708243 | -3.724275 |
| H     | 2.009984                | -1.398685 | -2.526189 |
| C     | 2.984158                | 0.437168  | -1.949884 |
| H     | 2.183767                | 1.089300  | -2.306157 |
| H     | 3.938977                | 0.953613  | -2.100430 |
| N     | 2.784608                | 0.349341  | -0.479027 |
| H     | 2.809740                | 1.345673  | -0.069920 |

## Continued (5R,6S)-Tg PC

| Atoms | Coordinates (Angstroms) |           |           |
|-------|-------------------------|-----------|-----------|
|       | X                       | Y         | Z         |
| C     | 4.096784                | -1.847033 | -2.178272 |
| H     | 3.937188                | -2.151223 | -1.138154 |
| H     | 4.127012                | -2.761575 | -2.782778 |
| H     | 5.080235                | -1.360438 | -2.258221 |
| H     | 3.524573                | -0.190329 | -0.016387 |
| C     | 1.606965                | 3.187191  | 0.097389  |
| C     | 0.913356                | 4.401283  | 0.699179  |
| H     | -0.067840               | 4.095850  | 1.082079  |
| H     | 1.507009                | 4.836383  | 1.506497  |
| H     | 0.737054                | 5.146550  | -0.083281 |
| O     | 1.054703                | 2.611869  | -0.871240 |
| O     | 2.698846                | 2.798590  | 0.617944  |
| N     | -1.510760               | -0.467289 | -0.186536 |
| C     | -1.889441               | 0.904738  | -0.327705 |
| C     | -3.407956               | 1.152913  | -0.364559 |
| C     | -4.005637               | 0.272117  | -1.474712 |
| O     | -4.998742               | 0.576493  | -2.119143 |
| N     | -3.358795               | -0.915877 | -1.619283 |
| C     | -2.185094               | -1.351695 | -0.894871 |
| O     | -1.944569               | -2.572142 | -0.998346 |
| H     | -3.765043               | -1.601748 | -2.244820 |
| H     | -1.488651               | 1.469294  | 0.532450  |
| O     | -1.396055               | 1.523166  | -1.526598 |
| H     | -0.546873               | 1.967110  | -1.327752 |
| C     | -4.077090               | 0.782427  | 0.953320  |
| H     | -3.649846               | 1.394761  | 1.755066  |
| H     | -5.150175               | 0.986599  | 0.883975  |
| H     | -3.916335               | -0.273252 | 1.188358  |
| O     | -3.668226               | 2.516110  | -0.600876 |
| H     | -3.048232               | 2.764213  | -1.309264 |



**Table S15.** Cartesian coordinates for the optimized 5,6-diHThy structures of the bifunctional pathway (Asp-Lys) at M06-2X/6-31+G(d)

5,6-diHThy RC:

| Atoms | Coordinates (Angstroms) |           |           |
|-------|-------------------------|-----------|-----------|
|       | X                       | Y         | Z         |
| O     | 0.124514                | -3.097354 | 1.605607  |
| C     | 0.867372                | -3.518828 | 0.480814  |
| C     | 1.573454                | -2.319051 | -0.128200 |
| O     | 0.664178                | -1.502537 | -0.850716 |
| C     | 2.221995                | -1.395307 | 0.907927  |
| O     | 3.418079                | -0.902184 | 0.334502  |
| C     | 1.128018                | -0.345454 | 1.162087  |
| C     | 0.198221                | -0.454734 | -0.055293 |
| H     | 0.195839                | -3.944394 | -0.276345 |
| H     | 1.608159                | -4.279685 | 0.786293  |
| H     | 2.325742                | -2.670432 | -0.843249 |
| H     | 2.472338                | -1.936322 | 1.835192  |
| H     | 0.584820                | -0.603270 | 2.075176  |
| H     | 1.524206                | 0.671239  | 1.239379  |
| C     | 4.060013                | 0.085909  | 1.112144  |
| H     | 5.039705                | 0.251405  | 0.654896  |
| H     | 3.504411                | 1.032070  | 1.130901  |
| H     | 4.207456                | -0.267369 | 2.146482  |
| C     | -0.890671               | -4.002852 | 1.957773  |
| H     | -0.464140               | -4.977404 | 2.265233  |
| H     | -1.427595               | -3.569741 | 2.804642  |
| H     | -1.583659               | -4.147134 | 1.120470  |
| H     | 0.240979                | 0.464876  | -0.643909 |
| C     | 1.101355                | 0.703983  | -3.429792 |
| H     | 0.627943                | 1.105814  | -4.337259 |
| H     | 0.341490                | 0.130543  | -2.885027 |
| C     | 1.575025                | 1.867388  | -2.552706 |
| H     | 0.710066                | 2.446836  | -2.207574 |
| H     | 2.195041                | 2.547698  | -3.169714 |
| N     | 2.252802                | 1.378450  | -1.362970 |
| H     | 2.254581                | 2.065939  | -0.605072 |
| C     | 2.240853                | -0.241426 | -3.801704 |
| H     | 2.646965                | -0.701987 | -2.894513 |
| H     | 1.899079                | -1.045276 | -4.463333 |
| H     | 3.051252                | 0.297839  | -4.312822 |
| H     | 3.205471                | 1.082831  | -1.549218 |
| C     | 0.940153                | 3.304811  | 1.149195  |
| C     | 0.444409                | 4.361944  | 2.152390  |

## Continued 5,6-diHThy RC

| Atoms | Coordinates (Angstroms) |           |           |
|-------|-------------------------|-----------|-----------|
|       | X                       | Y         | Z         |
| H     | -0.120960               | 5.138631  | 1.623880  |
| H     | -0.243949               | 3.884738  | 2.863308  |
| H     | 1.276012                | 4.810433  | 2.703390  |
| O     | 0.070733                | 2.835342  | 0.367308  |
| O     | 2.153362                | 2.978928  | 1.204440  |
| C     | -3.772620               | 0.421540  | -0.400442 |
| C     | -1.778948               | 0.541803  | 1.026885  |
| O     | -4.877278               | 0.775397  | -0.772919 |
| N     | -3.419923               | -0.919538 | -0.394425 |
| N     | -1.230246               | -0.632546 | 0.349055  |
| C     | -3.256083               | 2.582610  | 0.793002  |
| H     | -2.423029               | 3.246458  | 1.050512  |
| H     | -3.803721               | 2.304912  | 1.704387  |
| H     | -3.951273               | 3.106337  | 0.128290  |
| C     | -2.687018               | 1.347282  | 0.108724  |
| H     | -4.076379               | -1.552711 | -0.829237 |
| C     | -2.099625               | -1.445764 | -0.302393 |
| O     | -1.891014               | -2.557586 | -0.766202 |
| H     | -0.950299               | 1.180899  | 1.334930  |
| H     | -2.337471               | 0.215812  | 1.915921  |
| H     | -2.081013               | 1.665732  | -0.753469 |

## 5,6-diHThy TS:

| Atoms | Coordinates (Angstroms) |           |           |
|-------|-------------------------|-----------|-----------|
|       | X                       | Y         | Z         |
| O     | -0.573496               | -3.074026 | -1.752157 |
| C     | -1.033104               | -3.325665 | -0.440937 |
| C     | -1.797065               | -2.114800 | 0.086042  |
| O     | -0.905540               | -1.281424 | 0.877646  |
| C     | -2.339926               | -1.174551 | -0.994787 |
| O     | -3.546905               | -0.616335 | -0.498959 |
| C     | -1.189007               | -0.168904 | -1.154260 |
| C     | -0.554920               | -0.219100 | 0.202324  |
| H     | -0.186047               | -3.503450 | 0.235425  |
| H     | -1.702055               | -4.202581 | -0.449244 |
| H     | -2.591397               | -2.424043 | 0.771206  |
| H     | -2.540924               | -1.709202 | -1.931603 |
| H     | -0.469502               | -0.566156 | -1.873226 |
| H     | -1.486525               | 0.845189  | -1.427127 |
| C     | -4.111839               | 0.356990  | -1.357962 |
| H     | -5.10992                | 0.572376  | -0.968299 |

## Continued 5,6-diHThy TS

| Atoms | Coordinates (Angstroms) |           |           |
|-------|-------------------------|-----------|-----------|
|       | X                       | Y         | Z         |
| H     | -3.522277               | 1.282786  | -1.381109 |
| H     | -4.205446               | -0.038963 | -2.380817 |
| C     | 0.628942                | -3.749380 | -2.054146 |
| H     | 0.460084                | -4.837578 | -2.109457 |
| H     | 0.955807                | -3.389260 | -3.032440 |
| H     | 1.391897                | -3.527979 | -1.300532 |
| H     | 0.114226                | 0.503105  | 0.635542  |
| C     | -1.165753               | 0.710541  | 3.371325  |
| H     | -0.792757               | 1.192722  | 4.284451  |
| H     | -0.359055               | 0.068421  | 2.998054  |
| C     | -1.480605               | 1.801318  | 2.346740  |
| H     | -0.571010               | 2.350658  | 2.078540  |
| H     | -2.179107               | 2.527546  | 2.798299  |
| N     | -2.007489               | 1.247232  | 1.103803  |
| H     | -2.049413               | 1.968227  | 0.368337  |
| C     | -2.379795               | -0.155531 | 3.703186  |
| H     | -2.701135               | -0.725425 | 2.824419  |
| H     | -2.150818               | -0.876440 | 4.495013  |
| H     | -3.224749               | 0.460397  | 4.039070  |
| H     | -2.926100               | 0.822200  | 1.211736  |
| C     | -0.610405               | 3.257401  | -1.109465 |
| C     | -0.004509               | 4.275905  | -2.084701 |
| H     | 0.648013                | 4.967109  | -1.542162 |
| H     | 0.620018                | 3.740376  | -2.809725 |
| H     | -0.781992               | 4.827295  | -2.618421 |
| O     | 0.185853                | 2.687344  | -0.322993 |
| O     | -1.855600               | 3.047819  | -1.189277 |
| C     | 3.893181                | 0.149444  | 0.671547  |
| C     | 2.144564                | 0.215862  | -1.080280 |
| O     | 4.956990                | 0.520216  | 1.153706  |
| N     | 3.464274                | -1.146459 | 0.770590  |
| N     | 1.483027                | -0.948773 | -0.519456 |
| C     | 3.605916                | 2.258436  | -0.687176 |
| H     | 2.840651                | 2.928643  | -1.091170 |
| H     | 4.278285                | 1.945434  | -1.495871 |
| H     | 4.202217                | 2.796549  | 0.054357  |
| C     | 2.920123                | 1.053459  | -0.060974 |
| H     | 3.998147                | -1.765227 | 1.370273  |
| C     | 2.174471                | -1.651007 | 0.361702  |
| O     | 1.842728                | -2.735843 | 0.880523  |
| H     | 1.387735                | 0.866588  | -1.537437 |

## Continued 5,6-diHThy TS

| Atoms | Coordinates (Angstroms) |           |           |
|-------|-------------------------|-----------|-----------|
|       | X                       | Y         | Z         |
| H     | 2.841975                | -0.087323 | -1.884329 |
| H     | 2.198659                | 1.419489  | 0.686710  |

## 5,6-diHThy PC:

| Atoms | Coordinates (Angstroms) |           |           |
|-------|-------------------------|-----------|-----------|
|       | X                       | Y         | Z         |
| O     | 0.574405                | -3.170073 | 1.684735  |
| C     | 0.736380                | -3.237700 | 0.278720  |
| C     | 1.759466                | -2.196489 | -0.201689 |
| O     | 1.125601                | -1.213537 | -1.040972 |
| C     | 2.394736                | -1.374660 | 0.915738  |
| O     | 3.626183                | -0.859869 | 0.394106  |
| C     | 1.343583                | -0.282739 | 1.098253  |
| C     | 0.951033                | -0.004422 | -0.344976 |
| H     | -0.220606               | -3.039098 | -0.223392 |
| H     | 1.081142                | -4.250914 | 0.012436  |
| H     | 2.536511                | -2.665353 | -0.814992 |
| H     | 2.586366                | -1.956932 | 1.823039  |
| H     | 0.465392                | -0.718097 | 1.586673  |
| H     | 1.684818                | 0.607793  | 1.631109  |
| C     | 4.318667                | -0.026293 | 1.301567  |
| H     | 5.318304                | 0.129621  | 0.887872  |
| H     | 3.826166                | 0.947345  | 1.428182  |
| H     | 4.410715                | -0.513368 | 2.283568  |
| C     | -0.642886               | -3.764345 | 2.088630  |
| H     | -0.644163               | -4.839989 | 1.849127  |
| H     | -0.711453               | -3.641851 | 3.173435  |
| H     | -1.487374               | -3.273071 | 1.593957  |
| H     | -0.071277               | 0.356281  | -0.453919 |
| C     | 1.098439                | 0.624102  | -3.342083 |
| H     | 0.693133                | 1.195678  | -4.186700 |
| H     | 0.328054                | -0.092197 | -3.038926 |
| C     | 1.349582                | 1.623560  | -2.217551 |
| H     | 0.438341                | 2.151963  | -1.924487 |
| H     | 2.089580                | 2.373395  | -2.524059 |
| N     | 1.866834                | 1.016291  | -0.965279 |
| H     | 2.035432                | 1.837639  | -0.228374 |
| C     | 2.356293                | -0.124080 | -3.779928 |
| H     | 2.716190                | -0.783555 | -2.983625 |
| H     | 2.152969                | -0.750396 | -4.654500 |
| H     | 3.160312                | 0.575971  | -4.046447 |

## Continued 5,6-diHThy PC

| Atoms | Coordinates (Angstroms) |           |           |
|-------|-------------------------|-----------|-----------|
|       | X                       | Y         | Z         |
| H     | 2.766335                | 0.545665  | -1.109100 |
| C     | 0.970541                | 3.266200  | 0.987667  |
| C     | 0.730673                | 4.199705  | 2.167575  |
| H     | -0.143045               | 4.837948  | 1.979808  |
| H     | 0.509101                | 3.583358  | 3.046513  |
| H     | 1.611391                | 4.798586  | 2.389530  |
| O     | -0.000816               | 2.887672  | 0.311847  |
| O     | 2.182842                | 2.889276  | 0.796546  |
| C     | -3.942201               | 0.498985  | -0.547350 |
| C     | -2.189959               | 0.313432  | 1.201859  |
| O     | -4.939916               | 1.032415  | -1.027218 |
| N     | -3.704821               | -0.836761 | -0.647441 |
| N     | -1.724239               | -0.948749 | 0.665067  |
| C     | -3.347889               | 2.545157  | 0.804326  |
| H     | -2.498065               | 3.100852  | 1.212949  |
| H     | -4.063245               | 2.331761  | 1.608462  |
| H     | -3.857102               | 3.163455  | 0.060121  |
| C     | -2.843219               | 1.251686  | 0.181076  |
| H     | -4.326315               | -1.379122 | -1.236261 |
| C     | -2.506287               | -1.539273 | -0.205830 |
| O     | -2.364325               | -2.672151 | -0.719826 |
| H     | -1.337411               | 0.849394  | 1.646194  |
| H     | -2.916621               | 0.151984  | 2.023921  |
| H     | -2.083025               | 1.501583  | -0.577048 |

**Table S16.** Cartesian coordinates for the optimized 5-OH-6HThy structures of the bifunctional pathway (Asp-Lys) at M06-2X/6-31+G(d)

5-OH-6HThy RC:

| Atoms | Coordinates (Angstroms) |           |           |
|-------|-------------------------|-----------|-----------|
|       | X                       | Y         | Z         |
| O     | -1.912756               | 1.411037  | -1.577764 |
| C     | -1.333845               | 2.623479  | -1.140481 |
| C     | 0.034697                | 2.336218  | -0.543564 |
| O     | -0.083157               | 1.735256  | 0.736875  |
| C     | 0.876013                | 1.382161  | -1.399211 |
| O     | 2.192964                | 1.898656  | -1.467914 |
| C     | 0.741716                | 0.032118  | -0.680942 |
| C     | 0.060893                | 0.352205  | 0.661735  |
| H     | -1.969113               | 3.083920  | -0.371497 |
| H     | -1.231396               | 3.315031  | -1.995325 |
| H     | 0.567608                | 3.284718  | -0.404295 |
| H     | 0.478247                | 1.319960  | -2.424648 |
| H     | 0.128052                | -0.645317 | -1.278783 |
| H     | 1.713055                | -0.431554 | -0.496837 |
| C     | 3.072882                | 1.077687  | -2.210285 |
| H     | 4.017262                | 1.624524  | -2.284540 |
| H     | 3.251884                | 0.110751  | -1.722511 |
| H     | 2.678024                | 0.910820  | -3.226225 |
| C     | -3.266047               | 1.549060  | -1.918511 |
| H     | -3.396453               | 2.248050  | -2.760963 |
| H     | -3.631839               | 0.561149  | -2.213726 |
| H     | -3.847942               | 1.912792  | -1.058004 |
| H     | 0.666787                | 0.019641  | 1.505693  |
| C     | 2.785237                | 3.038343  | 2.446203  |
| H     | 3.015179                | 3.597921  | 3.365027  |
| H     | 1.694714                | 2.984706  | 2.343424  |
| C     | 3.314211                | 1.608808  | 2.580663  |
| H     | 2.855345                | 1.141865  | 3.461068  |
| H     | 4.404805                | 1.647196  | 2.776435  |
| N     | 2.950387                | 0.815375  | 1.420598  |
| H     | 2.994568                | -0.194205 | 1.573210  |
| C     | 3.374721                | 3.759647  | 1.234844  |
| H     | 3.091435                | 3.246022  | 0.309484  |
| H     | 3.016093                | 4.793949  | 1.170244  |
| H     | 4.471862                | 3.789205  | 1.293429  |
| H     | 3.538156                | 1.008550  | 0.613291  |
| C     | 2.982217                | -2.472696 | 0.351520  |
| C     | 3.218653                | -3.983565 | 0.163235  |

## Continued 5-OH-6HThy RC

| Atoms | Coordinates (Angstroms) |           |           |
|-------|-------------------------|-----------|-----------|
|       | X                       | Y         | Z         |
| H     | 3.378012                | -4.460910 | 1.135367  |
| H     | 2.318279                | -4.430533 | -0.275766 |
| H     | 4.068804                | -4.173308 | -0.496757 |
| O     | 2.143379                | -2.151916 | 1.240317  |
| O     | 3.616724                | -1.690822 | -0.398541 |
| N     | -1.260708               | -0.351026 | 0.764730  |
| C     | -1.192802               | -1.803291 | 0.677035  |
| H     | -1.441673               | -2.241787 | 1.653341  |
| C     | -2.155325               | -2.375645 | -0.358573 |
| C     | -2.285875               | -3.886704 | -0.203802 |
| H     | -2.670212               | -4.152311 | 0.786199  |
| H     | -2.978461               | -4.278471 | -0.954188 |
| H     | -1.300386               | -4.343152 | -0.339415 |
| C     | -3.529198               | -1.716344 | -0.202291 |
| O     | -4.513716               | -2.121768 | -0.804171 |
| N     | -3.564052               | -0.638082 | 0.634463  |
| C     | -2.456901               | 0.237382  | 0.924841  |
| O     | -2.742034               | 1.373507  | 1.265509  |
| H     | -4.454014               | -0.153039 | 0.696283  |
| H     | -0.158699               | -2.093577 | 0.457734  |
| O     | -1.684720               | -2.044426 | -1.658130 |
| H     | -2.377209               | -2.289147 | -2.292542 |

## 5-OH-6HThy TS:

| Atoms | Coordinates (Angstroms) |           |           |
|-------|-------------------------|-----------|-----------|
|       | X                       | Y         | Z         |
| O     | -1.387319               | -1.986746 | 1.282292  |
| C     | -0.393182               | -2.895707 | 0.879521  |
| C     | 0.897746                | -2.137846 | 0.627424  |
| O     | 0.885813                | -1.580110 | -0.711622 |
| C     | 1.125055                | -0.945563 | 1.563969  |
| O     | 2.498263                | -0.927929 | 1.914122  |
| C     | 0.657686                | 0.247466  | 0.714452  |
| C     | 0.799428                | -0.281883 | -0.676314 |
| H     | -0.697389               | -3.405453 | -0.045214 |
| H     | -0.216590               | -3.639863 | 1.677560  |
| H     | 1.752455                | -2.821336 | 0.657028  |
| H     | 0.521442                | -1.039368 | 2.476152  |
| H     | -0.402339               | 0.436735  | 0.911904  |
| H     | 1.234924                | 1.163261  | 0.867456  |
| C     | 2.829323                | 0.120949  | 2.810791  |

## Continued 5-OH-6HThy TS

| Atoms | Coordinates (Angstroms) |           |           |
|-------|-------------------------|-----------|-----------|
|       | X                       | Y         | Z         |
| H     | 3.864859                | -0.051168 | 3.115815  |
| H     | 2.745543                | 1.107951  | 2.337959  |
| H     | 2.183151                | 0.079395  | 3.701118  |
| C     | -2.653024               | -2.588343 | 1.398214  |
| H     | -2.663032               | -3.324635 | 2.219500  |
| H     | -3.369039               | -1.791424 | 1.616272  |
| H     | -2.931205               | -3.080462 | 0.456849  |
| H     | 0.827630                | 0.266403  | -1.599842 |
| C     | 3.933640                | -1.705682 | -1.904850 |
| H     | 4.489149                | -2.007021 | -2.803196 |
| H     | 2.942654                | -2.169474 | -1.963340 |
| C     | 3.770265                | -0.185768 | -1.921618 |
| H     | 3.223920                | 0.115176  | -2.824315 |
| H     | 4.768108                | 0.284502  | -1.983880 |
| N     | 3.010932                | 0.290231  | -0.774169 |
| H     | 2.798212                | 1.296662  | -0.837625 |
| C     | 4.663580                | -2.203379 | -0.656996 |
| H     | 4.091768                | -1.983352 | 0.251695  |
| H     | 4.823704                | -3.286784 | -0.696449 |
| H     | 5.646604                | -1.723311 | -0.561027 |
| H     | 3.489414                | 0.124510  | 0.108701  |
| C     | 1.923958                | 3.399106  | 0.034592  |
| C     | 1.344709                | 4.808227  | 0.224646  |
| H     | 1.250247                | 5.321749  | -0.735611 |
| H     | 0.342395                | 4.711434  | 0.659749  |
| H     | 1.958936                | 5.390399  | 0.916745  |
| O     | 1.692130                | 2.832422  | -1.067813 |
| O     | 2.546519                | 2.896157  | 1.006701  |
| N     | -1.397900               | -0.061202 | -1.322773 |
| C     | -1.952237               | 1.252332  | -1.103836 |
| H     | -2.335434               | 1.677230  | -2.048307 |
| C     | -3.091681               | 1.322894  | -0.087647 |
| C     | -3.789364               | 2.675839  | -0.118730 |
| H     | -4.241965               | 2.860521  | -1.098593 |
| H     | -4.584636               | 2.709805  | 0.632476  |
| H     | -3.055126               | 3.460866  | 0.089437  |
| C     | -4.097781               | 0.195553  | -0.342564 |
| O     | -5.201964               | 0.187867  | 0.200124  |
| N     | -3.644701               | -0.796317 | -1.142546 |
| C     | -2.226660               | -1.070368 | -1.415276 |
| O     | -1.991883               | -2.260951 | -1.685202 |



## Continued 5-OH-6HThy TS

| Atoms | Coordinates (Angstroms) |           |           |
|-------|-------------------------|-----------|-----------|
|       | X                       | Y         | Z         |
| H     | -4.238399               | -1.615598 | -1.225697 |
| H     | -1.150845               | 1.926656  | -0.767303 |
| O     | -2.542996               | 1.080501  | 1.209658  |
| H     | -3.284725               | 1.000364  | 1.829650  |

## 5-OH-6HThy PC:

| Atoms | Coordinates (Angstroms) |           |           |
|-------|-------------------------|-----------|-----------|
|       | X                       | Y         | Z         |
| O     | -1.789448               | 1.286989  | -1.669638 |
| C     | -1.216640               | 2.500574  | -1.239632 |
| C     | 0.289331                | 2.348475  | -1.044562 |
| O     | 0.608302                | 2.008967  | 0.311219  |
| C     | 0.931961                | 1.248436  | -1.888699 |
| O     | 2.281951                | 1.663801  | -2.127764 |
| C     | 0.843601                | 0.053018  | -0.942985 |
| C     | 1.129852                | 0.705858  | 0.397282  |
| H     | -1.669111               | 2.807265  | -0.284685 |
| H     | -1.397584               | 3.276421  | -2.007817 |
| H     | 0.771779                | 3.311016  | -1.255128 |
| H     | 0.418693                | 1.087907  | -2.844759 |
| H     | -0.182720               | -0.323739 | -0.926689 |
| H     | 1.525282                | -0.768702 | -1.177607 |
| C     | 3.048621                | 0.720232  | -2.851310 |
| H     | 3.970080                | 1.228342  | -3.148530 |
| H     | 3.303114                | -0.158861 | -2.244810 |
| H     | 2.510471                | 0.397654  | -3.755391 |
| C     | -3.175150               | 1.408043  | -1.884111 |
| H     | -3.377077               | 2.073443  | -2.741622 |
| H     | -3.559873               | 0.408434  | -2.104971 |
| H     | -3.669452               | 1.800844  | -0.986701 |
| H     | 0.680941                | 0.188888  | 1.246331  |
| C     | 2.445326                | 2.334132  | 2.630032  |
| H     | 2.767227                | 2.371159  | 3.678606  |
| H     | 1.350988                | 2.300169  | 2.629470  |
| C     | 2.999183                | 1.040994  | 2.042113  |
| H     | 2.644940                | 0.157558  | 2.580832  |
| H     | 4.096654                | 1.036653  | 2.072622  |
| N     | 2.615867                | 0.811165  | 0.627960  |
| H     | 3.111325                | -0.133525 | 0.291895  |
| C     | 2.923470                | 3.585035  | 1.895766  |
| H     | 2.506308                | 3.625237  | 0.884140  |

## Continued 5-OH-6HThy PC

| Atoms | Coordinates (Angstroms) |           |           |
|-------|-------------------------|-----------|-----------|
|       | X                       | Y         | Z         |
| H     | 2.598844                | 4.490263  | 2.416806  |
| H     | 4.017689                | 3.612992  | 1.824273  |
| H     | 2.962184                | 1.553506  | 0.011099  |
| C     | 3.147965                | -2.269687 | 0.573536  |
| C     | 3.433691                | -3.721801 | 0.208657  |
| H     | 2.902231                | -3.962301 | -0.724495 |
| H     | 4.503093                | -3.858394 | 0.022188  |
| H     | 3.087634                | -4.398110 | 0.998793  |
| O     | 2.367746                | -2.006719 | 1.497967  |
| O     | 3.737089                | -1.391925 | -0.156521 |
| N     | -1.505323               | -0.253167 | 1.361520  |
| C     | -1.494757               | -1.691780 | 1.238310  |
| H     | -1.851402               | -2.167017 | 2.171849  |
| C     | -2.323598               | -2.294558 | 0.101202  |
| C     | -2.507594               | -3.796876 | 0.285040  |
| H     | -3.077811               | -4.013314 | 1.195235  |
| H     | -3.050831               | -4.219867 | -0.565800 |
| H     | -1.522029               | -4.269057 | 0.362008  |
| C     | -3.685900               | -1.605027 | 0.001276  |
| O     | -4.572875               | -2.055538 | -0.729266 |
| N     | -3.792892               | -0.467022 | 0.712842  |
| C     | -2.640796               | 0.353378  | 1.170619  |
| O     | -2.938135               | 1.560453  | 1.288315  |
| H     | -4.638653               | 0.075403  | 0.568062  |
| H     | -0.457297               | -2.031665 | 1.100976  |
| O     | -1.654892               | -2.040884 | -1.138343 |
| H     | -2.291643               | -2.226775 | -1.846737 |

## 6. Cartesian coordinates for the structures of RC, TS and PC of protonated bases in the mono- and di-functional reaction pathways.

**Table S17.** Cartesian coordinates for the optimized TH structures of the monofunctional pathway (Asp-H<sub>2</sub>O) at M06-2X/6-31+G(d)

TH RC:

| Atoms | Coordinates (Angstroms) |           |           |
|-------|-------------------------|-----------|-----------|
|       | X                       | Y         | Z         |
| O     | -0.447874               | 0.602458  | 2.958778  |
| C     | 0.953300                | 0.382343  | 2.842980  |
| C     | 1.285687                | 0.618463  | 1.386286  |
| O     | 0.495254                | -0.305883 | 0.615338  |
| C     | 0.914267                | 2.036664  | 0.917478  |
| O     | 2.012224                | 2.552375  | 0.199736  |
| C     | -0.356019               | 1.830266  | 0.074801  |
| C     | -0.279552               | 0.356327  | -0.330900 |
| C     | -3.911175               | -1.630190 | -0.941074 |
| C     | -2.307156               | -0.077362 | -1.605130 |
| H     | 1.196170                | -0.646382 | 3.141460  |
| H     | 1.504533                | 1.082726  | 3.484349  |
| H     | 2.341464                | 0.425484  | 1.180963  |
| H     | 0.705099                | 2.692588  | 1.774180  |
| H     | -1.244013               | 2.009674  | 0.686914  |
| H     | -0.381932               | 2.487135  | -0.797789 |
| C     | 1.947652                | 3.950302  | -0.029933 |
| H     | 2.864551                | 4.225477  | -0.551996 |
| H     | 1.085409                | 4.217501  | -0.654270 |
| H     | 1.890106                | 4.491038  | 0.923610  |
| C     | -0.943752               | 0.522751  | 4.293237  |
| H     | -0.490856               | 1.308756  | 4.905993  |
| H     | -2.022667               | 0.669340  | 4.241647  |
| H     | -0.723471               | -0.460085 | 4.725960  |
| O     | 1.943257                | 1.041330  | -2.159585 |
| H     | 2.597736                | 0.362406  | -2.387669 |
| H     | 2.316474                | 1.494458  | -1.383718 |
| H     | 0.161878                | 0.233298  | -1.325758 |
| C     | 4.541023                | -1.026013 | -0.946255 |
| O     | 3.951837                | -0.342074 | -0.152087 |
| O     | 4.131604                | -1.011786 | -2.241374 |

## Continued TH RC

| Atoms | Coordinates (Angstroms) |           |           |
|-------|-------------------------|-----------|-----------|
|       | X                       | Y         | Z         |
| C     | 5.714819                | -1.916731 | -0.633363 |
| H     | 5.950123                | -1.839895 | 0.427058  |
| H     | 5.478813                | -2.957096 | -0.879229 |
| H     | 6.588588                | -1.615359 | -1.220040 |
| O     | -4.977202               | -2.352137 | -1.230174 |
| N     | -3.312556               | -1.817558 | 0.214056  |
| N     | -1.642848               | -0.300349 | -0.423429 |
| C     | -4.266482               | -0.433245 | -3.168773 |
| H     | -4.362477               | -1.353918 | -3.750936 |
| H     | -3.781927               | 0.323190  | -3.786551 |
| H     | -5.276762               | -0.092636 | -2.926942 |
| C     | -3.483910               | -0.678939 | -1.914977 |
| C     | -2.224860               | -1.110437 | 0.505052  |
| O     | -1.775896               | -1.242545 | 1.713330  |
| H     | -1.809095               | 0.609404  | -2.287244 |
| H     | 4.685141                | -1.570249 | -2.809636 |
| H     | -5.170462               | -2.958466 | -0.489842 |
| H     | -1.123328               | -0.543299 | 2.015635  |

## TH TS:

| Atoms | Coordinates (Angstroms) |           |           |
|-------|-------------------------|-----------|-----------|
|       | X                       | Y         | Z         |
| O     | 0.012013                | 2.495919  | 1.249300  |
| C     | 1.277453                | 2.021110  | 1.658995  |
| C     | 1.834859                | 1.181581  | 0.536739  |
| O     | 0.976996                | -0.011542 | 0.391160  |
| C     | 1.812491                | 1.850375  | -0.847522 |
| O     | 3.036629                | 1.559667  | -1.486384 |
| C     | 0.614204                | 1.185680  | -1.550059 |
| C     | 0.470547                | -0.069511 | -0.770181 |
| C     | -4.524592               | -0.978113 | 0.298362  |
| C     | -3.006842               | -0.239058 | -1.311574 |
| H     | 1.192986                | 1.426671  | 2.579888  |
| H     | 1.966908                | 2.857295  | 1.844365  |
| H     | 2.823949                | 0.784763  | 0.774011  |
| H     | 1.676366                | 2.934378  | -0.754190 |
| H     | -0.317471               | 1.742231  | -1.387722 |
| H     | 0.755209                | 1.006432  | -2.616980 |
| C     | 3.325647                | 2.421526  | -2.581683 |
| H     | 4.293597                | 2.112317  | -2.974900 |
| H     | 2.568495                | 2.335301  | -3.370478 |

## Continued TH TS

| Atoms | Coordinates (Angstroms) |           |           |
|-------|-------------------------|-----------|-----------|
|       | X                       | Y         | Z         |
| H     | 3.383032                | 3.461875  | -2.241940 |
| C     | -0.538184               | 3.465384  | 2.143438  |
| H     | 0.107716                | 4.349021  | 2.182807  |
| H     | -1.516319               | 3.738102  | 1.747718  |
| H     | -0.653508               | 3.038744  | 3.146468  |
| O     | 2.097285                | -1.063229 | -1.882826 |
| H     | 2.469525                | -1.820226 | -1.393722 |
| H     | 2.807174                | -0.394132 | -1.915988 |
| H     | -0.137950               | -0.931399 | -1.003054 |
| C     | 3.762493                | -2.566175 | 0.846462  |
| O     | 3.581964                | -1.382323 | 0.955799  |
| O     | 3.262286                | -3.184441 | -0.259655 |
| C     | 4.499718                | -3.441124 | 1.821868  |
| H     | 4.827625                | -2.839387 | 2.668049  |
| H     | 3.849592                | -4.246996 | 2.177168  |
| H     | 5.373171                | -3.891793 | 1.339292  |
| O     | -5.656279               | -1.600854 | 0.625629  |
| N     | -3.777259               | -0.488977 | 1.272977  |
| N     | -2.209773               | 0.267177  | -0.346812 |
| C     | -5.098351               | -1.442610 | -2.136245 |
| H     | -5.263947               | -2.513852 | -1.986168 |
| H     | -4.660746               | -1.293970 | -3.126869 |
| H     | -6.079441               | -0.958167 | -2.113799 |
| C     | -4.201014               | -0.882929 | -1.073162 |
| C     | -2.655586               | 0.122767  | 0.900289  |
| O     | -1.918354               | 0.629645  | 1.889383  |
| H     | -2.654257               | -0.114570 | -2.335872 |
| H     | 3.467106                | -4.133239 | -0.285084 |
| H     | -5.748701               | -1.580231 | 1.594798  |
| H     | -1.198266               | 1.167286  | 1.495430  |

## TH PC:

| Atoms | Coordinates (Angstroms) |           |          |
|-------|-------------------------|-----------|----------|
|       | X                       | Y         | Z        |
| O     | -0.470710               | 0.698951  | 2.652174 |
| C     | 0.904846                | 0.411650  | 2.777182 |
| C     | 1.592844                | 0.780573  | 1.483221 |
| O     | 1.129207                | -0.108953 | 0.427161 |
| C     | 1.274717                | 2.195939  | 0.973429 |
| O     | 2.463523                | 2.679129  | 0.331677 |

## Continued TH PC

| Atoms | Coordinates (Angstroms) |           |           |
|-------|-------------------------|-----------|-----------|
|       | X                       | Y         | Z         |
| C     | 0.192745                | 1.946862  | -0.080784 |
| C     | 0.672843                | 0.618330  | -0.617230 |
| C     | -4.156936               | -1.914418 | -0.979697 |
| C     | -2.957050               | 0.037840  | -1.411412 |
| H     | 1.060159                | -0.655727 | 2.992567  |
| H     | 1.347879                | 0.999414  | 3.594973  |
| H     | 2.674202                | 0.647485  | 1.576867  |
| H     | 0.974304                | 2.876674  | 1.775947  |
| H     | -0.783059               | 1.776978  | 0.369775  |
| H     | 0.121026                | 2.732699  | -0.839480 |
| C     | 2.484703                | 4.092233  | 0.132162  |
| H     | 3.427949                | 4.325711  | -0.361116 |
| H     | 1.646692                | 4.420604  | -0.494293 |
| H     | 2.442439                | 4.600159  | 1.100948  |
| C     | -1.180939               | 0.550146  | 3.880264  |
| H     | -0.804789               | 1.263166  | 4.622621  |
| H     | -2.228961               | 0.756288  | 3.665620  |
| H     | -1.081078               | -0.472980 | 4.260932  |
| O     | 1.890235                | 0.983642  | -1.528245 |
| H     | 2.454252                | 0.189487  | -1.717392 |
| H     | 2.448170                | 1.640428  | -0.987244 |
| H     | 0.029639                | 0.036020  | -1.270848 |
| C     | 4.499953                | -0.968551 | -0.888673 |
| O     | 4.163962                | -0.135176 | -0.083455 |
| O     | 3.790011                | -1.010692 | -2.058459 |
| C     | 5.626075                | -1.949104 | -0.750794 |
| H     | 6.103790                | -1.816418 | 0.223957  |
| H     | 5.253633                | -2.973263 | -0.842515 |
| H     | 6.366151                | -1.779886 | -1.539626 |
| O     | -5.100673               | -2.796785 | -1.314766 |
| N     | -3.474417               | -2.126434 | 0.132247  |
| N     | -2.232915               | -0.143296 | -0.290872 |
| C     | -4.766584               | -0.620408 | -3.083727 |
| H     | -4.705526               | -1.500517 | -3.734586 |
| H     | -4.411881               | 0.252335  | -3.642179 |
| H     | -5.825503               | -0.469043 | -2.842185 |
| C     | -3.953658               | -0.813336 | -1.839035 |
| C     | -2.542199               | -1.221584 | 0.425844  |
| O     | -1.860431               | -1.434364 | 1.551780  |
| H     | -2.714714               | 0.925114  | -1.997327 |
| H     | 4.082008                | -1.703092 | -2.674545 |

Continued TH PC

| Atoms | Coordinates (Angstroms) |           |           |
|-------|-------------------------|-----------|-----------|
|       | X                       | Y         | Z         |
| H     | -5.125972               | -3.488007 | -0.629647 |
| H     | -1.268259               | -0.665509 | 1.696942  |

**Table S18.** Cartesian coordinates for the optimized (5R,6S)-TgH structures of the monofunctional pathway (Asp-H<sub>2</sub>O) at M06-2X/6-31+G(d)

(5R,6S)-TgH RC:

| Atoms | Coordinates (Angstroms) |           |           |
|-------|-------------------------|-----------|-----------|
|       | X                       | Y         | Z         |
| O     | -1.928215               | 2.365807  | 0.329202  |
| C     | -1.013972               | 2.620773  | 1.377008  |
| C     | 0.357327                | 2.102507  | 0.982296  |
| O     | 0.405430                | 0.668816  | 0.907279  |
| C     | 0.806428                | 2.544435  | -0.406996 |
| O     | 2.213205                | 2.561386  | -0.417715 |
| C     | 0.189152                | 1.452263  | -1.309180 |
| C     | 0.059139                | 0.235454  | -0.365840 |
| C     | -3.754804               | -1.571583 | 0.113450  |
| C     | -2.332574               | -0.315401 | -1.106016 |
| H     | -1.340626               | 2.119317  | 2.295592  |
| H     | -0.947691               | 3.703666  | 1.565063  |
| H     | 1.093390                | 2.393967  | 1.735760  |
| H     | 0.417044                | 3.537428  | -0.671869 |
| H     | -0.769917               | 1.852175  | -1.634927 |
| H     | 0.840091                | 1.208124  | -2.154033 |
| C     | 2.771031                | 3.151897  | -1.581387 |
| H     | 3.850963                | 3.170796  | -1.434634 |
| H     | 2.546845                | 2.561179  | -2.477244 |
| H     | 2.398751                | 4.175956  | -1.706697 |
| C     | -3.264466               | 2.650107  | 0.693952  |
| H     | -3.374941               | 3.701058  | 0.989426  |
| H     | -3.887643               | 2.458262  | -0.181701 |
| H     | -3.577427               | 2.001800  | 1.521083  |
| O     | 2.817156                | -0.079415 | -1.186364 |
| H     | 3.557534                | -0.691439 | -1.026735 |
| H     | 2.966767                | 0.685817  | -0.601072 |
| H     | 0.731374                | -0.578564 | -0.643579 |
| C     | 6.094581                | -1.511109 | -0.288370 |
| O     | 6.295598                | -0.206899 | -0.011436 |
| O     | 4.993960                | -1.875455 | -0.622845 |
| C     | 7.288705                | -2.420302 | -0.151451 |
| H     | 8.098857                | -2.085845 | -0.806746 |
| H     | 7.655730                | -2.410490 | 0.879750  |
| H     | 7.000550                | -3.434592 | -0.421988 |
| N     | -1.336608               | -0.384215 | -0.248963 |
| C     | -1.585271               | -1.066265 | 1.029023  |
| C     | -2.582222               | -2.220167 | 0.821943  |



## Continued (5R,6S)-TgH RC

| Atoms | Coordinates (Angstroms) |           |           |
|-------|-------------------------|-----------|-----------|
|       | X                       | Y         | Z         |
| N     | -3.609216               | -0.708845 | -0.828935 |
| H     | -0.623549               | -1.462506 | 1.373994  |
| H     | 7.214260                | -0.032018 | 0.245335  |
| O     | -2.122325               | -0.135168 | 1.919540  |
| H     | -2.391686               | -0.620145 | 2.719601  |
| O     | -2.912975               | -2.627941 | 2.123009  |
| H     | -3.641356               | -3.269292 | 2.109711  |
| O     | -4.939597               | -1.982031 | 0.492626  |
| H     | -5.636592               | -1.541552 | -0.032807 |
| O     | -2.208736               | 0.125371  | -2.332694 |
| H     | -1.293288               | 0.358510  | -2.565730 |
| C     | -2.024233               | -3.369146 | -0.018766 |
| H     | -2.786258               | -4.143593 | -0.145907 |
| H     | -1.701949               | -3.040927 | -1.011299 |
| H     | -1.170232               | -3.803337 | 0.508324  |

## (5R,6S)-TgH TS:

| Atoms | Coordinates (Angstroms) |           |           |
|-------|-------------------------|-----------|-----------|
|       | X                       | Y         | Z         |
| O     | 1.580165                | 2.423985  | -0.358111 |
| C     | 0.857701                | 2.413283  | -1.564349 |
| C     | -0.544428               | 1.936579  | -1.260103 |
| O     | -0.530502               | 0.489145  | -0.970189 |
| C     | -1.154466               | 2.544358  | 0.003960  |
| O     | -2.540935               | 2.647926  | -0.200513 |
| C     | -0.762377               | 1.518093  | 1.091776  |
| C     | -0.581930               | 0.269609  | 0.285386  |
| C     | 4.146449                | -1.218556 | 0.340186  |
| C     | 2.528716                | -0.025327 | 1.342305  |
| H     | 1.325179                | 1.745227  | -2.297192 |
| H     | 0.791176                | 3.427369  | -1.990115 |
| H     | -1.206134               | 2.045229  | -2.120741 |
| H     | -0.720848               | 3.529812  | 0.215942  |
| H     | 0.184909                | 1.833100  | 1.531191  |
| H     | -1.526697               | 1.365330  | 1.855616  |
| C     | -3.218465               | 3.369085  | 0.818080  |
| H     | -4.246703               | 3.495323  | 0.478650  |
| H     | -3.219369               | 2.817300  | 1.765947  |
| H     | -2.758827               | 4.354462  | 0.963078  |
| C     | 2.961801                | 2.678492  | -0.548589 |
| H     | 3.113443                | 3.652393  | -1.032029 |

## Continued (5R,6S)-TgH TS

| Atoms | Coordinates (Angstroms) |           |           |
|-------|-------------------------|-----------|-----------|
|       | X                       | Y         | Z         |
| H     | 3.423196                | 2.690684  | 0.440519  |
| H     | 3.411242                | 1.884661  | -1.157783 |
| O     | -3.087963               | 0.006274  | 0.565064  |
| H     | -3.682137               | -0.768174 | 0.495138  |
| H     | -3.466114               | 0.699599  | 0.002615  |
| H     | -0.778700               | -0.743247 | 0.600524  |
| C     | -5.916832               | -2.040849 | -0.040959 |
| O     | -6.239679               | -0.805621 | -0.475220 |
| O     | -4.799135               | -2.233485 | 0.374395  |
| C     | -6.993403               | -3.090208 | -0.117614 |
| H     | -7.873127               | -2.776621 | 0.453267  |
| H     | -7.296683               | -3.245408 | -1.158022 |
| H     | -6.612042               | -4.024520 | 0.291266  |
| N     | 1.534874                | -0.446152 | 0.637256  |
| C     | 1.882399                | -1.228762 | -0.532931 |
| C     | 3.099322                | -2.133537 | -0.265964 |
| N     | 3.880878                | -0.237542 | 1.118325  |
| H     | 1.023595                | -1.862580 | -0.797238 |
| H     | -7.158115               | -0.758551 | -0.783573 |
| O     | 2.183346                | -0.338888 | -1.584856 |
| H     | 2.575457                | -0.869582 | -2.300798 |
| O     | 3.494170                | -2.606189 | -1.532941 |
| H     | 4.368770                | -3.024019 | -1.481262 |
| O     | 5.390739                | -1.541483 | 0.035668  |
| H     | 6.006943                | -0.939094 | 0.494722  |
| O     | 2.340963                | 0.702549  | 2.439045  |
| H     | 1.393483                | 0.734476  | 2.644981  |
| C     | 2.787840                | -3.279221 | 0.696090  |
| H     | 3.690232                | -3.869111 | 0.883699  |
| H     | 2.407476                | -2.912418 | 1.653758  |
| H     | 2.036830                | -3.927720 | 0.236400  |

## (5R,6S)-TgH PC:

| Atoms | Coordinates (Angstroms) |          |           |
|-------|-------------------------|----------|-----------|
|       | X                       | Y        | Z         |
| O     | -1.585345               | 2.226693 | 0.131506  |
| C     | -0.769301               | 2.390703 | 1.263896  |
| C     | 0.674059                | 2.132902 | 0.877097  |
| O     | 0.921099                | 0.699420 | 0.722136  |
| C     | 1.067214                | 2.726138 | -0.475199 |
| O     | 2.468122                | 3.008174 | -0.419957 |

## Continued (5R,6S)-TgH PC

| Atoms | Coordinates (Angstroms) |           |           |
|-------|-------------------------|-----------|-----------|
|       | X                       | Y         | Z         |
| C     | 0.797882                | 1.554443  | -1.425758 |
| C     | 1.222845                | 0.399441  | -0.547058 |
| C     | -4.074819               | -1.605076 | 0.291895  |
| C     | -2.694796               | -0.540093 | -1.122927 |
| H     | -1.056717               | 1.690238  | 2.057062  |
| H     | -0.843821               | 3.422990  | 1.645032  |
| H     | 1.342902                | 2.485775  | 1.666434  |
| H     | 0.501529                | 3.631280  | -0.717439 |
| H     | -0.277706               | 1.463633  | -1.578858 |
| H     | 1.328153                | 1.602437  | -2.376461 |
| C     | 2.917358                | 3.869407  | -1.462808 |
| H     | 3.979286                | 4.046645  | -1.289380 |
| H     | 2.776608                | 3.412417  | -2.452231 |
| H     | 2.376475                | 4.823132  | -1.419447 |
| C     | -2.966006               | 2.325700  | 0.435374  |
| H     | -3.201048               | 3.317331  | 0.846011  |
| H     | -3.510449               | 2.180477  | -0.499358 |
| H     | -3.250294               | 1.547447  | 1.153697  |
| O     | 2.823351                | 0.397441  | -0.732045 |
| H     | 3.396368                | -0.342669 | -0.368026 |
| H     | 3.148461                | 1.301461  | -0.469588 |
| H     | 0.962563                | -0.618167 | -0.818334 |
| C     | 5.867412                | -1.401940 | -0.151265 |
| O     | 6.307908                | -0.140260 | -0.047740 |
| O     | 4.671379                | -1.585319 | -0.265566 |
| C     | 6.903364                | -2.492689 | -0.111283 |
| H     | 7.644872                | -2.339222 | -0.901319 |
| H     | 7.419940                | -2.477830 | 0.854027  |
| H     | 6.420165                | -3.458819 | -0.247761 |
| N     | -1.577117               | -0.853858 | -0.579565 |
| C     | -1.682552               | -1.469327 | 0.726622  |
| C     | -2.904491               | -2.402850 | 0.829870  |
| N     | -3.991373               | -0.739987 | -0.644014 |
| H     | -0.775873               | -2.061990 | 0.910871  |
| H     | 7.270208                | -0.091561 | 0.055676  |
| O     | -1.799071               | -0.445218 | 1.692183  |
| H     | -2.059241               | -0.877729 | 2.524350  |
| O     | -3.060433               | -2.682263 | 2.205175  |
| H     | -3.940404               | -3.057127 | 2.371597  |
| O     | -5.238915               | -1.909199 | 0.852230  |
| H     | -5.944881               | -1.388546 | 0.425034  |

## Continued (5R,6S)-TgH PC

---

| Atoms | Coordinates (Angstroms) |           |           |
|-------|-------------------------|-----------|-----------|
|       | X                       | Y         | Z         |
| O     | -2.726428               | 0.072419  | -2.310988 |
| H     | -1.811209               | 0.149008  | -2.624848 |
| C     | -2.730477               | -3.682816 | 0.014166  |
| H     | -3.632343               | -4.299334 | 0.077904  |
| H     | -2.529740               | -3.463249 | -1.038459 |
| H     | -1.890962               | -4.248331 | 0.428517  |

---

**Table S19.** Cartesian coordinates for the optimized 5,6-diHThyH structures of the monofunctional pathway (Asp-H<sub>2</sub>O) at M06-2X/6-31+G(d)

5,6-diHThyH RC:

| Atoms | Coordinates (Angstroms) |           |           |
|-------|-------------------------|-----------|-----------|
|       | X                       | Y         | Z         |
| O     | 0.271596                | 2.926513  | 0.247405  |
| C     | 1.443045                | 2.436042  | 0.878140  |
| C     | 1.392823                | 0.931287  | 0.735275  |
| O     | 0.115174                | 0.506758  | 1.246094  |
| C     | 1.416363                | 0.431572  | -0.708241 |
| O     | 2.749323                | 0.294234  | -1.131630 |
| C     | 0.611307                | -0.869351 | -0.600360 |
| C     | -0.416769               | -0.534359 | 0.490321  |
| C     | -4.515978               | -0.137865 | -0.297899 |
| C     | -2.441983               | -1.297655 | -0.769603 |
| H     | 1.450609                | 2.729481  | 1.936029  |
| H     | 2.341492                | 2.830879  | 0.384979  |
| H     | 2.196861                | 0.451014  | 1.303781  |
| H     | 0.896081                | 1.152527  | -1.359881 |
| H     | 0.153773                | -1.187573 | -1.541528 |
| H     | 1.261212                | -1.669102 | -0.225948 |
| C     | 2.858720                | -0.045258 | -2.500609 |
| H     | 3.919789                | -0.017739 | -2.757020 |
| H     | 2.465170                | -1.052507 | -2.690506 |
| H     | 2.325035                | 0.679732  | -3.129823 |
| C     | 0.099684                | 4.336824  | 0.314194  |
| H     | 0.907563                | 4.840608  | -0.226706 |
| H     | -0.857122               | 4.561243  | -0.158473 |
| H     | 0.085750                | 4.672966  | 1.357350  |
| O     | 1.351581                | -2.301199 | 2.103326  |
| H     | 1.351045                | -2.722822 | 2.972668  |
| H     | 2.282336                | -2.078770 | 1.913246  |
| H     | -0.608917               | -1.390070 | 1.148173  |
| C     | 4.461581                | -1.504781 | 0.299870  |
| O     | 3.844922                | -1.261425 | 1.310600  |
| O     | 3.979662                | -2.427573 | -0.553188 |
| C     | 5.741339                | -0.814896 | -0.088552 |
| H     | 6.166845                | -0.330190 | 0.789398  |
| H     | 6.470420                | -1.510060 | -0.514280 |
| H     | 5.507461                | -0.046946 | -0.834273 |
| O     | -5.819227               | -0.112836 | -0.458515 |
| N     | -3.868972               | 0.966377  | -0.133048 |
| N     | -1.780998               | -0.178366 | -0.071085 |

## Continued 5,6-diHThyH RC

| Atoms | Coordinates (Angstroms) |           |           |
|-------|-------------------------|-----------|-----------|
|       | X                       | Y         | Z         |
| C     | -4.631494               | -2.503422 | -1.181256 |
| H     | -4.101929               | -3.460004 | -1.185003 |
| H     | -4.707412               | -2.143605 | -2.211853 |
| H     | -5.641155               | -2.670007 | -0.802635 |
| C     | -3.881896               | -1.498435 | -0.305659 |
| C     | -2.523651               | 0.903839  | 0.151616  |
| O     | -2.080028               | 2.009794  | 0.641648  |
| H     | -2.419133               | -1.102538 | -1.849875 |
| H     | 4.582572                | -2.573454 | -1.298567 |
| H     | -6.133891               | 0.810791  | -0.397934 |
| H     | -1.078844               | 2.111223  | 0.661525  |
| H     | -1.858942               | -2.201381 | -0.577585 |
| H     | -3.884707               | -1.846131 | 0.738830  |

## 5,6-diHThyH TS:

| Atoms | Coordinates (Angstroms) |           |           |
|-------|-------------------------|-----------|-----------|
|       | X                       | Y         | Z         |
| O     | -0.118773               | 2.879000  | 0.118745  |
| C     | -1.369404               | 2.659210  | -0.482162 |
| C     | -1.610836               | 1.173692  | -0.557351 |
| O     | -0.576684               | 0.579590  | -1.410370 |
| C     | -1.484635               | 0.389298  | 0.752940  |
| O     | -2.757859               | 0.314425  | 1.339840  |
| C     | -0.904135               | -0.968518 | 0.299354  |
| C     | -0.304098               | -0.615255 | -1.024829 |
| C     | 4.761695                | -0.384941 | 0.023185  |
| C     | 2.645220                | -1.407918 | 0.616258  |
| H     | -1.401122               | 3.097210  | -1.490278 |
| H     | -2.177184               | 3.105542  | 0.117601  |
| H     | -2.576352               | 0.964237  | -1.029752 |
| H     | -0.777744               | 0.896180  | 1.424395  |
| H     | -0.131347               | -1.364804 | 0.959133  |
| H     | -1.696447               | -1.715035 | 0.184661  |
| C     | -2.720336               | -0.219314 | 2.653214  |
| H     | -3.738242               | -0.177238 | 3.045457  |
| H     | -2.373812               | -1.261386 | 2.644884  |
| H     | -2.064822               | 0.377732  | 3.298564  |
| C     | 0.213592                | 4.259775  | 0.236048  |
| H     | -0.507895               | 4.767192  | 0.886409  |
| H     | 1.209597                | 4.307795  | 0.676038  |
| H     | 0.224323                | 4.735762  | -0.751516 |

## Continued 5,6-diHThyH TS

| Atoms | Coordinates (Angstroms) |           |           |
|-------|-------------------------|-----------|-----------|
|       | X                       | Y         | Z         |
| O     | -1.530102               | -1.776646 | -2.197764 |
| H     | -1.448533               | -1.605024 | -3.149682 |
| H     | -2.471218               | -1.596701 | -1.951585 |
| H     | 0.519724                | -1.110288 | -1.516345 |
| C     | -4.520604               | -1.245620 | -0.288766 |
| O     | -3.916625               | -0.902771 | -1.285862 |
| O     | -4.064089               | -2.301220 | 0.398463  |
| C     | -5.730094               | -0.532992 | 0.239481  |
| H     | -6.162725               | 0.078871  | -0.551411 |
| H     | -6.482640               | -1.227650 | 0.622176  |
| H     | -5.402974               | 0.122916  | 1.054280  |
| O     | 6.079302                | -0.504646 | 0.088162  |
| N     | 4.222818                | 0.779506  | 0.009911  |
| N     | 2.016721                | -0.166932 | 0.176136  |
| C     | 4.728220                | -2.865801 | 0.559019  |
| H     | 4.100732                | -3.760419 | 0.501839  |
| H     | 4.960601                | -2.675657 | 1.611572  |
| H     | 5.665416                | -3.068696 | 0.037545  |
| C     | 3.993826                | -1.677219 | -0.055992 |
| C     | 2.833206                | 0.797402  | -0.075673 |
| O     | 2.389921                | 1.993025  | -0.447716 |
| H     | 2.786749                | -1.378998 | 1.708979  |
| H     | -4.636505               | -2.524804 | 1.149940  |
| H     | 6.467607                | 0.390799  | 0.103560  |
| H     | 1.412801                | 2.028349  | -0.364983 |
| H     | 1.969503                | -2.247591 | 0.408628  |
| H     | 3.825305                | -1.863166 | -1.128766 |

## 5,6-diHThyH PC:

| Atoms | Coordinates (Angstroms) |           |           |
|-------|-------------------------|-----------|-----------|
|       | X                       | Y         | Z         |
| O     | 0.253827                | 2.805914  | 0.208027  |
| C     | 1.484424                | 2.555859  | 0.837666  |
| C     | 1.766470                | 1.073824  | 0.756247  |
| O     | 0.728422                | 0.377569  | 1.473394  |
| C     | 1.743199                | 0.480678  | -0.661775 |
| O     | 3.080550                | 0.329076  | -1.098853 |
| C     | 0.980357                | -0.854468 | -0.513837 |
| C     | 0.530881                | -0.856861 | 0.937051  |
| C     | -4.852975               | -0.123522 | -0.269455 |
| C     | -2.809871               | -1.233325 | -0.950929 |

## Continued 5,6-diHThyH PC

| Atoms | Coordinates (Angstroms) |           |           |
|-------|-------------------------|-----------|-----------|
|       | X                       | Y         | Z         |
| H     | 1.454163                | 2.873750  | 1.889952  |
| H     | 2.299375                | 3.097808  | 0.332924  |
| H     | 2.738453                | 0.862385  | 1.220212  |
| H     | 1.206638                | 1.155355  | -1.340741 |
| H     | 0.085917                | -0.877282 | -1.136785 |
| H     | 1.614999                | -1.712985 | -0.752057 |
| C     | 3.172447                | 0.084884  | -2.491432 |
| H     | 4.234515                | 0.036752  | -2.743039 |
| H     | 2.687651                | -0.862708 | -2.762510 |
| H     | 2.710638                | 0.898785  | -3.062018 |
| C     | -0.114866               | 4.179568  | 0.225487  |
| H     | 0.616520                | 4.775904  | -0.332777 |
| H     | -1.093600               | 4.250361  | -0.248694 |
| H     | -0.181675               | 4.546693  | 1.256682  |
| O     | 1.411822                | -1.864349 | 1.681054  |
| H     | 1.238768                | -1.797557 | 2.640461  |
| H     | 2.470730                | -1.707070 | 1.500913  |
| H     | -0.480242               | -1.202325 | 1.136634  |
| C     | 4.448940                | -1.608511 | 0.338437  |
| O     | 3.783295                | -1.336449 | 1.335739  |
| O     | 3.961665                | -2.492048 | -0.516289 |
| C     | 5.764924                | -0.956280 | 0.070868  |
| H     | 6.246407                | -0.718139 | 1.017354  |
| H     | 6.425868                | -1.571966 | -0.542101 |
| H     | 5.551396                | -0.018700 | -0.452942 |
| O     | -6.173725               | -0.108197 | -0.399855 |
| N     | -4.218279               | 0.969661  | -0.055314 |
| N     | -2.097421               | -0.140800 | -0.301196 |
| C     | -5.012735               | -2.487036 | -1.180115 |
| H     | -4.470777               | -3.435905 | -1.239531 |
| H     | -5.178794               | -2.121155 | -2.198369 |
| H     | -5.987886               | -2.674085 | -0.726210 |
| C     | -4.204473               | -1.478496 | -0.368496 |
| C     | -2.834276               | 0.842526  | 0.073482  |
| O     | -2.302607               | 1.923766  | 0.639544  |
| H     | -2.905037               | -1.019252 | -2.028601 |
| H     | 4.559761                | -2.654766 | -1.264588 |
| H     | -6.476588               | 0.812646  | -0.287903 |
| H     | -1.324228               | 1.864555  | 0.603357  |
| H     | -2.215687               | -2.151193 | -0.863868 |
| H     | -4.097089               | -1.839654 | 0.666823  |



**Table S20.** Cartesian coordinates for the optimized 5-OH-6HThyH structures of the monofunctional pathway (Asp-H<sub>2</sub>O) at M06-2X/6-31+G(d)

5-OH-6HThyH RC:

| Atoms | Coordinates (Angstroms) |           |           |
|-------|-------------------------|-----------|-----------|
|       | X                       | Y         | Z         |
| O     | 0.032642                | 0.174360  | 3.122397  |
| C     | 1.284633                | -0.409287 | 2.785434  |
| C     | 1.419100                | -0.313088 | 1.283717  |
| O     | 0.265460                | -0.940452 | 0.708715  |
| C     | 1.410569                | 1.116253  | 0.742302  |
| O     | 2.732415                | 1.593782  | 0.705161  |
| C     | 0.737830                | 0.942809  | -0.622208 |
| C     | -0.215512               | -0.224513 | -0.379228 |
| C     | -4.148959               | -0.666385 | -0.716159 |
| C     | -2.305545               | 0.785848  | -1.298063 |
| H     | 1.306562                | -1.456504 | 3.114455  |
| H     | 2.101644                | 0.141234  | 3.270911  |
| H     | 2.324694                | -0.827394 | 0.940695  |
| H     | 0.803101                | 1.764131  | 1.394101  |
| H     | 0.238006                | 1.845179  | -0.982026 |
| H     | 1.484416                | 0.625152  | -1.358999 |
| C     | 2.813654                | 2.946317  | 0.302170  |
| H     | 3.855020                | 3.256353  | 0.415137  |
| H     | 2.511537                | 3.065044  | -0.747079 |
| H     | 2.185284                | 3.585330  | 0.936837  |
| C     | -0.243871               | 0.182064  | 4.519530  |
| H     | 0.494392                | 0.800204  | 5.041356  |
| H     | -1.238670               | 0.610917  | 4.646196  |
| H     | -0.225101               | -0.838070 | 4.920123  |
| O     | 1.630359                | -1.742788 | -1.994410 |
| H     | 1.661214                | -2.622565 | -2.391718 |
| H     | 2.532231                | -1.559259 | -1.671614 |
| H     | -0.303726               | -0.887332 | -1.242948 |
| C     | 4.575844                | 0.129394  | -0.924831 |
| O     | 3.981581                | -0.901761 | -0.712855 |
| O     | 4.150403                | 0.936171  | -1.914423 |
| C     | 5.762132                | 0.591478  | -0.123388 |
| H     | 6.531813                | 1.050180  | -0.750504 |
| H     | 5.412506                | 1.328750  | 0.607802  |
| H     | 6.184317                | -0.257962 | 0.412483  |
| O     | -5.319735               | -1.160771 | -1.044630 |
| N     | -3.777447               | -0.647147 | 0.518602  |
| N     | -1.650555               | 0.225279  | -0.111616 |

## Continued 5-OH-6HThyH RC

| Atoms | Coordinates (Angstroms) |           |           |
|-------|-------------------------|-----------|-----------|
|       | X                       | Y         | Z         |
| C     | -4.110938               | 0.408409  | -3.014167 |
| H     | -3.435480               | 0.748015  | -3.803111 |
| H     | -4.701065               | 1.255923  | -2.661542 |
| H     | -4.800958               | -0.326203 | -3.431328 |
| C     | -3.293254               | -0.204080 | -1.889912 |
| C     | -2.456654               | -0.362916 | 0.775317  |
| O     | -2.090744               | -0.718620 | 1.955174  |
| H     | -2.812596               | 1.716738  | -1.019413 |
| H     | 4.730548                | 1.705866  | -2.020861 |
| H     | -5.767271               | -1.498866 | -0.243126 |
| H     | -1.163709               | -0.426457 | 2.233360  |
| H     | -1.539466               | 1.008431  | -2.044260 |
| O     | -2.518249               | -1.313923 | -2.305376 |
| H     | -3.040360               | -1.896907 | -2.879077 |

## 5-OH-6HThyH TS:

| Atoms | Coordinates (Angstroms) |           |           |
|-------|-------------------------|-----------|-----------|
|       | X                       | Y         | Z         |
| O     | 0.463134                | 3.046136  | -0.089185 |
| C     | 1.513212                | 2.597316  | 0.734685  |
| C     | 1.618125                | 1.096824  | 0.634016  |
| O     | 0.421991                | 0.491472  | 1.209193  |
| C     | 1.675468                | 0.512920  | -0.782371 |
| O     | 3.026066                | 0.405032  | -1.161803 |
| C     | 0.947357                | -0.840741 | -0.647075 |
| C     | 0.179702                | -0.663345 | 0.638353  |
| C     | -4.384103               | -0.235726 | 0.172430  |
| C     | -2.584240               | -0.806932 | -1.354015 |
| H     | 1.336228                | 2.887959  | 1.780298  |
| H     | 2.470015                | 3.030086  | 0.406612  |
| H     | 2.477218                | 0.750224  | 1.214101  |
| H     | 1.117508                | 1.166821  | -1.466045 |
| H     | 0.264575                | -1.049358 | -1.471087 |
| H     | 1.663819                | -1.662884 | -0.557734 |
| C     | 3.185233                | 0.019942  | -2.515748 |
| H     | 4.255208                | 0.038708  | -2.731593 |
| H     | 2.794933                | -0.992762 | -2.687953 |
| H     | 2.673744                | 0.721541  | -3.186220 |
| C     | 0.314966                | 4.461857  | -0.078550 |
| H     | 1.225641                | 4.938997  | -0.458452 |
| H     | -0.525042               | 4.698480  | -0.731564 |

## Continued 5-OH-6HThyH TS

| Atoms | Coordinates (Angstroms) |           |           |
|-------|-------------------------|-----------|-----------|
|       | X                       | Y         | Z         |
| H     | 0.103567                | 4.818466  | 0.936495  |
| O     | 1.062258                | -1.925339 | 1.628535  |
| H     | 0.767388                | -1.954878 | 2.555332  |
| H     | 2.051554                | -1.741006 | 1.617038  |
| H     | -0.792812               | -1.102398 | 0.842995  |
| C     | 4.292950                | -1.491250 | 0.544501  |
| O     | 3.550730                | -1.110991 | 1.433091  |
| O     | 3.865858                | -2.476038 | -0.251775 |
| C     | 5.635593                | -0.892910 | 0.260114  |
| H     | 5.805242                | -0.045854 | 0.922147  |
| H     | 6.425418                | -1.637264 | 0.407671  |
| H     | 5.663671                | -0.555154 | -0.781519 |
| O     | -5.620169               | -0.537493 | 0.557803  |
| N     | -3.925486               | 0.946894  | 0.306283  |
| N     | -1.889823               | 0.361713  | -0.841299 |
| C     | -4.433783               | -2.494853 | -0.987092 |
| H     | -3.786244               | -3.259869 | -1.425975 |
| H     | -5.080912               | -2.083831 | -1.766914 |
| H     | -5.077742               | -2.964011 | -0.237447 |
| C     | -3.573928               | -1.408847 | -0.363127 |
| C     | -2.591635               | 1.124584  | -0.082378 |
| O     | -2.088119               | 2.234120  | 0.441932  |
| H     | -3.121847               | -0.544988 | -2.277322 |
| H     | 4.528072                | -2.727884 | -0.916493 |
| H     | -6.032318               | 0.267927  | 0.924362  |
| H     | -1.151125               | 2.334489  | 0.157984  |
| H     | -1.856064               | -1.585224 | -1.614305 |
| O     | -2.792403               | -1.925048 | 0.721152  |
| H     | -3.376807               | -2.394427 | 1.336686  |

## 5-OH-6HThyH PC:

| Atoms | Coordinates (Angstroms) |           |           |
|-------|-------------------------|-----------|-----------|
|       | X                       | Y         | Z         |
| O     | 0.042206                | 0.347574  | 3.058724  |
| C     | 1.245852                | -0.354376 | 2.856284  |
| C     | 1.603438                | -0.302728 | 1.388955  |
| O     | 0.611758                | -1.035432 | 0.644986  |
| C     | 1.618207                | 1.099960  | 0.762522  |
| O     | 2.960351                | 1.546633  | 0.713602  |
| C     | 0.971180                | 0.908728  | -0.627626 |
| C     | 0.511119                | -0.540216 | -0.617872 |

## Continued 5-OH-6HThyH PC

| Atoms | Coordinates (Angstroms) |           |           |
|-------|-------------------------|-----------|-----------|
|       | X                       | Y         | Z         |
| C     | -4.224339               | -0.864417 | -0.788860 |
| C     | -2.694132               | 0.982889  | -1.164214 |
| H     | 1.141237                | -1.401261 | 3.176015  |
| H     | 2.060709                | 0.108877  | 3.433289  |
| H     | 2.586646                | -0.770036 | 1.247385  |
| H     | 1.019719                | 1.788655  | 1.371844  |
| H     | 0.094842                | 1.545473  | -0.751076 |
| H     | 1.681826                | 1.108678  | -1.435203 |
| C     | 3.059548                | 2.933151  | 0.440133  |
| H     | 4.120737                | 3.191846  | 0.456636  |
| H     | 2.637695                | 3.176609  | -0.544871 |
| H     | 2.540199                | 3.520609  | 1.206524  |
| C     | -0.390940               | 0.326381  | 4.414022  |
| H     | 0.361250                | 0.793252  | 5.060552  |
| H     | -1.319341               | 0.895618  | 4.457944  |
| H     | -0.575880               | -0.703362 | 4.742297  |
| O     | 1.484298                | -1.317594 | -1.528043 |
| H     | 1.291530                | -2.272646 | -1.458279 |
| H     | 2.514347                | -1.144815 | -1.287137 |
| H     | -0.456229               | -0.771768 | -1.060184 |
| C     | 4.498794                | 0.043175  | -1.058848 |
| O     | 3.824629                | -0.952446 | -0.812634 |
| O     | 4.078562                | 0.867963  | -2.005490 |
| C     | 5.755604                | 0.349245  | -0.312425 |
| H     | 6.466029                | 0.929766  | -0.904791 |
| H     | 5.466911                | 0.922693  | 0.575785  |
| H     | 6.215761                | -0.583508 | 0.013803  |
| O     | -5.325520               | -1.466953 | -1.231637 |
| N     | -3.898997               | -0.916961 | 0.443477  |
| N     | -2.077271               | 0.619552  | 0.098442  |
| C     | -4.199562               | 0.266049  | -3.065380 |
| H     | -3.544779               | 0.795270  | -3.764019 |
| H     | -5.011888               | 0.932790  | -2.762926 |
| H     | -4.648774               | -0.589659 | -3.577995 |
| C     | -3.387234               | -0.182077 | -1.862709 |
| C     | -2.697757               | -0.274562 | 0.776390  |
| O     | -2.234726               | -0.704318 | 1.944277  |
| H     | -3.426643               | 1.788208  | -1.004984 |
| H     | 4.681100                | 1.618478  | -2.137650 |
| H     | -5.760768               | -1.900465 | -0.473172 |
| H     | -1.377817               | -0.257699 | 2.130782  |

## Continued 5-OH-6HThyH PC

---

| Atoms | Coordinates (Angstroms) |           |           |
|-------|-------------------------|-----------|-----------|
|       | X                       | Y         | Z         |
| H     | -1.929421               | 1.372729  | -1.848519 |
| O     | -2.350113               | -1.093969 | -2.244872 |
| H     | -2.737889               | -1.802968 | -2.781334 |

---

**Table S21.** Cartesian coordinates for the optimized TH structures of the bifunctional pathway (Asp-Lys) at M06-2X/6-31+G(d)

TH RC:

| Atoms | Coordinates (Angstroms) |           |           |
|-------|-------------------------|-----------|-----------|
|       | X                       | Y         | Z         |
| O     | -2.060839               | -2.183110 | 0.532691  |
| C     | -1.198442               | -3.156108 | -0.011948 |
| C     | 0.207708                | -2.589447 | -0.022446 |
| O     | 0.289584                | -1.434762 | -0.893793 |
| C     | 0.691243                | -2.084270 | 1.336397  |
| O     | 2.068963                | -2.365724 | 1.419911  |
| C     | 0.365206                | -0.578970 | 1.311182  |
| C     | 0.166339                | -0.241287 | -0.172578 |
| H     | -1.511807               | -3.416908 | -1.034968 |
| H     | -1.213974               | -4.076365 | 0.592202  |
| H     | 0.907722                | -3.327153 | -0.423285 |
| H     | 0.160141                | -2.589152 | 2.156437  |
| H     | -0.544612               | -0.388549 | 1.883590  |
| H     | 1.183735                | 0.026878  | 1.707857  |
| C     | 2.622777                | -2.137007 | 2.701360  |
| H     | 3.674270                | -2.426738 | 2.644426  |
| H     | 2.557188                | -1.078520 | 2.989969  |
| H     | 2.116469                | -2.751902 | 3.458502  |
| C     | -3.428065               | -2.553481 | 0.436113  |
| H     | -3.609790               | -3.504501 | 0.951886  |
| H     | -4.009304               | -1.764985 | 0.916945  |
| H     | -3.729785               | -2.639755 | -0.616074 |
| H     | 0.906951                | 0.467673  | -0.543980 |
| C     | 3.207604                | -0.438554 | -2.676759 |
| H     | 3.709661                | -0.090328 | -3.586998 |
| H     | 2.164274                | -0.099388 | -2.734227 |
| C     | 3.873137                | 0.213287  | -1.468076 |
| H     | 3.836905                | 1.303790  | -1.578793 |
| H     | 4.936076                | -0.073003 | -1.445993 |
| N     | 3.159820                | -0.131866 | -0.234847 |
| H     | 3.582184                | 0.336735  | 0.563339  |
| C     | 3.250033                | -1.965106 | -2.620356 |
| H     | 2.681681                | -2.344924 | -1.763011 |
| H     | 2.816969                | -2.407496 | -3.522949 |
| H     | 4.281386                | -2.327000 | -2.531992 |
| H     | 3.216078                | -1.131566 | -0.043937 |
| C     | 2.466853                | 3.031158  | 1.013877  |
| C     | 2.842353                | 4.418557  | 0.558935  |

## Continued TH RC

| Atoms | Coordinates (Angstroms) |           |           |
|-------|-------------------------|-----------|-----------|
|       | X                       | Y         | Z         |
| H     | 3.656283                | 4.364821  | -0.175756 |
| H     | 1.978243                | 4.897541  | 0.100455  |
| H     | 3.185375                | 5.023578  | 1.407278  |
| O     | 1.376623                | 2.532582  | 0.879369  |
| O     | 3.447538                | 2.315480  | 1.601169  |
| C     | -3.692205               | 1.404322  | -0.467314 |
| C     | -1.509798               | 1.455477  | 0.389044  |
| O     | -4.959772               | 1.785143  | -0.509949 |
| N     | -3.385658               | 0.412136  | -1.278214 |
| N     | -1.207130               | 0.386725  | -0.399993 |
| C     | -3.096259               | 3.213115  | 1.253214  |
| H     | -2.230006               | 3.535885  | 1.830918  |
| H     | -3.888599               | 2.970984  | 1.968040  |
| H     | -3.420690               | 4.066008  | 0.650342  |
| C     | -2.745883               | 2.031822  | 0.393856  |
| C     | -2.155211               | -0.063384 | -1.266922 |
| O     | -1.875483               | -0.977539 | -2.160038 |
| H     | -0.691449               | 1.818527  | 1.005012  |
| H     | -5.136577               | 2.528305  | 0.088941  |
| H     | -0.959265               | -1.318394 | -2.011547 |
| H     | 4.262394                | 2.827735  | 1.693805  |

## TH TS:

| Atoms | Coordinates (Angstroms) |           |           |
|-------|-------------------------|-----------|-----------|
|       | X                       | Y         | Z         |
| O     | 1.766343                | -2.191184 | -0.894450 |
| C     | 0.875339                | -3.142758 | -0.372214 |
| C     | -0.500563               | -2.517761 | -0.324760 |
| O     | -0.541518               | -1.485957 | 0.724624  |
| C     | -0.905098               | -1.777789 | -1.604261 |
| O     | -2.273460               | -2.018935 | -1.821096 |
| C     | -0.583822               | -0.305105 | -1.279485 |
| C     | -0.601971               | -0.291982 | 0.216553  |
| H     | 1.186566                | -3.463862 | 0.633341  |
| H     | 0.827897                | -4.035446 | -1.016190 |
| H     | -1.259563               | -3.249949 | -0.039619 |
| H     | -0.314307               | -2.131538 | -2.459042 |
| H     | 0.420921                | -0.057511 | -1.630922 |
| H     | -1.297856               | 0.413795  | -1.681420 |
| C     | -2.722538               | -1.630476 | -3.107387 |
| H     | -3.771140               | -1.920776 | -3.175454 |

## Continued TH TS

| Atoms | Coordinates (Angstroms) |           |           |
|-------|-------------------------|-----------|-----------|
|       | X                       | Y         | Z         |
| H     | -2.637984               | -0.545446 | -3.254673 |
| H     | -2.151129               | -2.145776 | -3.889933 |
| C     | 3.113793                | -2.643609 | -0.873228 |
| H     | 3.214344                | -3.577902 | -1.440067 |
| H     | 3.718274                | -1.866872 | -1.343155 |
| H     | 3.452526                | -2.793129 | 0.159410  |
| H     | -0.857653               | 0.529848  | 0.862415  |
| C     | -3.101668               | -0.534914 | 2.693972  |
| H     | -3.509294               | -0.140647 | 3.631664  |
| H     | -2.009438               | -0.452048 | 2.770670  |
| C     | -3.606058               | 0.341692  | 1.549601  |
| H     | -3.254837               | 1.371725  | 1.693475  |
| H     | -4.706491               | 0.368483  | 1.572152  |
| N     | -3.092042               | -0.119454 | 0.253681  |
| H     | -3.386651               | 0.522400  | -0.480791 |
| C     | -3.497508               | -2.002233 | 2.540384  |
| H     | -3.018953               | -2.460937 | 1.667296  |
| H     | -3.199899               | -2.583890 | 3.417065  |
| H     | -4.582584               | -2.106801 | 2.424540  |
| H     | -3.464364               | -1.035457 | 0.007550  |
| C     | -2.246829               | 3.276072  | -0.407113 |
| C     | -2.357054               | 4.731809  | -0.040134 |
| H     | -3.144383               | 4.874654  | 0.707491  |
| H     | -1.407894               | 5.075818  | 0.367821  |
| H     | -2.612128               | 5.328592  | -0.921924 |
| O     | -1.263017               | 2.593062  | -0.258550 |
| O     | -3.352367               | 2.707627  | -0.940518 |
| C     | 4.085381                | 0.959018  | 0.453902  |
| C     | 1.860160                | 1.508351  | -0.050583 |
| O     | 5.407826                | 1.119401  | 0.386584  |
| N     | 3.695161                | -0.095196 | 1.147897  |
| N     | 1.443468                | 0.429638  | 0.635282  |
| C     | 3.657788                | 3.063351  | -0.939260 |
| H     | 2.804967                | 3.615278  | -1.342019 |
| H     | 4.296462                | 2.791398  | -1.788525 |
| H     | 4.216161                | 3.755152  | -0.297169 |
| C     | 3.187588                | 1.853916  | -0.181308 |
| C     | 2.390617                | -0.304449 | 1.222652  |
| O     | 2.024593                | -1.353159 | 1.962439  |
| H     | 1.074034                | 2.109148  | -0.508148 |
| H     | 5.644339                | 1.918311  | -0.109373 |



## Continued TH TS

---

| Atoms | Coordinates (Angstroms) |           |           |
|-------|-------------------------|-----------|-----------|
|       | X                       | Y         | Z         |
| H     | 1.054611                | -1.418377 | 1.973959  |
| H     | -4.083201               | 3.341219  | -1.024697 |

---

## TH PC:

---

| Atoms | Coordinates (Angstroms) |           |           |
|-------|-------------------------|-----------|-----------|
|       | X                       | Y         | Z         |
| O     | -1.817025               | -2.073072 | 0.526404  |
| C     | -1.016593               | -3.035925 | -0.107976 |
| C     | 0.437949                | -2.627574 | 0.011715  |
| O     | 0.716132                | -1.499230 | -0.864166 |
| C     | 0.835082                | -2.149838 | 1.410682  |
| O     | 2.203614                | -2.499159 | 1.603272  |
| C     | 0.684736                | -0.631532 | 1.298744  |
| C     | 1.151558                | -0.398874 | -0.129053 |
| H     | -1.289169               | -3.135044 | -1.169866 |
| H     | -1.143580               | -4.021622 | 0.369408  |
| H     | 1.079518                | -3.458486 | -0.300604 |
| H     | 0.209046                | -2.597646 | 2.190820  |
| H     | -0.368290               | -0.347007 | 1.354491  |
| H     | 1.255074                | -0.073996 | 2.046781  |
| C     | 2.608304                | -2.472657 | 2.963622  |
| H     | 3.656720                | -2.773058 | 2.990172  |
| H     | 2.503651                | -1.468872 | 3.399722  |
| H     | 2.013409                | -3.183049 | 3.552071  |
| C     | -3.201816               | -2.364046 | 0.400206  |
| H     | -3.428039               | -3.344156 | 0.840767  |
| H     | -3.742466               | -1.586891 | 0.941422  |
| H     | -3.504437               | -2.344846 | -0.653498 |
| H     | 0.790673                | 0.518888  | -0.587704 |
| C     | 2.975528                | -0.664365 | -2.660913 |
| H     | 3.470149                | -0.172850 | -3.505892 |
| H     | 1.903406                | -0.655639 | -2.874218 |
| C     | 3.271415                | 0.194266  | -1.440808 |
| H     | 2.867593                | 1.203410  | -1.549293 |
| H     | 4.348825                | 0.265173  | -1.265330 |
| N     | 2.680047                | -0.338202 | -0.168318 |
| H     | 2.973225                | 0.297394  | 0.586373  |
| C     | 3.481984                | -2.098220 | -2.525412 |
| H     | 2.941505                | -2.646395 | -1.745291 |
| H     | 3.336868                | -2.649177 | -3.460439 |

---

## Continued TH PC

---

| Atoms | Coordinates (Angstroms) |           |           |
|-------|-------------------------|-----------|-----------|
|       | X                       | Y         | Z         |
| H     | 4.554502                | -2.122411 | -2.288438 |
| H     | 3.038158                | -1.273393 | 0.079654  |
| C     | 2.669706                | 2.943793  | 0.945171  |
| C     | 2.854487                | 4.430873  | 1.041984  |
| H     | 3.659877                | 4.756874  | 0.376216  |
| H     | 1.927300                | 4.925870  | 0.757050  |
| H     | 3.120154                | 4.716371  | 2.064795  |
| O     | 1.663422                | 2.374956  | 0.606159  |
| O     | 3.746079                | 2.169594  | 1.254992  |
| C     | -4.021904               | 1.380211  | -0.424315 |
| C     | -1.795679               | 1.933797  | 0.055917  |
| O     | -5.350676               | 1.525871  | -0.330024 |
| N     | -3.631880               | 0.399349  | -1.219871 |
| N     | -1.368118               | 0.958033  | -0.754523 |
| C     | -3.597593               | 3.299263  | 1.214254  |
| H     | -2.742231               | 3.801618  | 1.674159  |
| H     | -4.218866               | 2.907271  | 2.029554  |
| H     | -4.175298               | 4.068240  | 0.685132  |
| C     | -3.129057               | 2.209993  | 0.290977  |
| C     | -2.320536               | 0.229970  | -1.332483 |
| O     | -1.931923               | -0.785534 | -2.113802 |
| H     | -1.016673               | 2.522093  | 0.541297  |
| H     | -5.579257               | 2.268868  | 0.248435  |
| H     | -0.971235               | -0.899111 | -1.984101 |
| H     | 4.515596                | 2.691301  | 1.537437  |

---

**Table S22.** Cartesian coordinates for the optimized (5R,6S)-TgH structures of the bifunctional pathway (Asp-Lys) at M06-2X/6-31+G(d)

(5R,6S)-TgH RC:

| Atoms | Coordinates (Angstroms) |           |           |
|-------|-------------------------|-----------|-----------|
|       | X                       | Y         | Z         |
| O     | -1.249040               | -2.698097 | 0.560394  |
| C     | -0.147358               | -3.342679 | -0.041287 |
| C     | 1.100225                | -2.512746 | 0.187672  |
| O     | 0.995994                | -1.228759 | -0.471478 |
| C     | 1.382285                | -2.184957 | 1.651492  |
| O     | 2.777780                | -2.220574 | 1.832803  |
| C     | 0.773548                | -0.783532 | 1.844769  |
| C     | 0.618784                | -0.209605 | 0.426321  |
| H     | -0.323438               | -3.467579 | -1.121669 |
| H     | 0.001622                | -4.343791 | 0.391469  |
| H     | 1.962349                | -3.017485 | -0.256632 |
| H     | 0.903552                | -2.917574 | 2.317265  |
| H     | -0.194887               | -0.864676 | 2.342631  |
| H     | 1.436394                | -0.149894 | 2.438841  |
| C     | 3.172703                | -2.212005 | 3.192992  |
| H     | 4.258395                | -2.308488 | 3.206286  |
| H     | 2.889033                | -1.276334 | 3.692024  |
| H     | 2.725461                | -3.057625 | 3.730627  |
| C     | -2.476994               | -3.328638 | 0.221368  |
| H     | -2.473028               | -4.379646 | 0.534683  |
| H     | -3.274585               | -2.801532 | 0.748040  |
| H     | -2.654048               | -3.265654 | -0.860018 |
| H     | 1.275049                | 0.648066  | 0.251781  |
| C     | 3.500333                | 0.410675  | -1.922043 |
| H     | 3.814151                | 0.976332  | -2.808114 |
| H     | 2.405797                | 0.493863  | -1.854720 |
| C     | 4.120062                | 1.048493  | -0.681408 |
| H     | 3.866659                | 2.112928  | -0.648926 |
| H     | 5.214720                | 0.978710  | -0.750289 |
| N     | 3.584975                | 0.448352  | 0.547627  |
| H     | 4.026052                | 0.881204  | 1.356394  |
| C     | 3.890379                | -1.055389 | -2.096741 |
| H     | 3.558431                | -1.661751 | -1.246932 |
| H     | 3.443374                | -1.480476 | -3.000154 |
| H     | 4.977424                | -1.161199 | -2.180570 |
| H     | 3.812723                | -0.546766 | 0.607507  |
| C     | 0.939289                | 2.807909  | -2.182849 |
| C     | -0.242431               | 2.294069  | -2.947793 |

## Continued (5R,6S)-TgH RC

| Atoms | Coordinates (Angstroms) |           |           |
|-------|-------------------------|-----------|-----------|
|       | X                       | Y         | Z         |
| H     | -1.116979               | 2.233275  | -2.298595 |
| H     | -0.449828               | 2.937348  | -3.805546 |
| H     | -0.002452               | 1.297015  | -3.334560 |
| O     | 1.033126                | 2.845890  | -0.963843 |
| O     | 1.929328                | 3.210496  | -2.968442 |
| N     | -0.795607               | 0.232906  | 0.170706  |
| C     | -1.279573               | 1.330152  | 1.027857  |
| C     | -2.734167               | 1.054816  | 1.400290  |
| C     | -3.441993               | 0.763326  | 0.076534  |
| O     | -4.684818               | 1.142112  | -0.010170 |
| N     | -2.901770               | 0.154441  | -0.928291 |
| C     | -1.595404               | -0.189335 | -0.806770 |
| O     | -1.159114               | -0.941852 | -1.775039 |
| H     | -0.645458               | 1.347934  | 1.921752  |
| O     | -1.288130               | 2.552486  | 0.367492  |
| H     | -0.396782               | 2.758323  | -0.007102 |
| H     | -4.907930               | 1.665145  | 0.789722  |
| H     | -0.208308               | -1.168994 | -1.597738 |
| H     | 2.668461                | 3.519694  | -2.412041 |
| O     | -3.330495               | 2.183246  | 1.989368  |
| H     | -2.934055               | 2.982053  | 1.592316  |
| C     | -2.901343               | -0.126403 | 2.349417  |
| H     | -2.430961               | 0.125604  | 3.304552  |
| H     | -3.963498               | -0.311472 | 2.531739  |
| H     | -2.443224               | -1.031717 | 1.940371  |

## (5R,6S)-TgH TS:

| Atoms | Coordinates (Angstroms) |           |           |
|-------|-------------------------|-----------|-----------|
|       | X                       | Y         | Z         |
| O     | -0.427919               | -2.595808 | -1.239356 |
| C     | 0.791805                | -2.489145 | -1.926797 |
| C     | 1.822528                | -1.865782 | -1.012119 |
| O     | 1.511573                | -0.440236 | -0.812227 |
| C     | 1.876790                | -2.455166 | 0.401396  |
| O     | 3.226054                | -2.530058 | 0.787792  |
| C     | 1.056822                | -1.447556 | 1.231688  |
| C     | 1.157066                | -0.194860 | 0.420377  |
| H     | 0.679098                | -1.878403 | -2.835848 |
| H     | 1.159662                | -3.481560 | -2.233012 |
| H     | 2.812226                | -1.888575 | -1.476403 |
| H     | 1.418123                | -3.452148 | 0.423509  |

## Continued (5R,6S)-TgH TS

| Atoms | Coordinates (Angstroms) |           |           |
|-------|-------------------------|-----------|-----------|
|       | X                       | Y         | Z         |
| H     | 0.012225                | -1.767382 | 1.251178  |
| H     | 1.433518                | -1.321366 | 2.243261  |
| C     | 3.443079                | -3.360812 | 1.917190  |
| H     | 4.517134                | -3.367302 | 2.102735  |
| H     | 2.925259                | -2.977290 | 2.806597  |
| H     | 3.101632                | -4.383532 | 1.716283  |
| C     | -1.486549               | -2.994150 | -2.103321 |
| H     | -1.266332               | -3.967045 | -2.560339 |
| H     | -2.387835               | -3.078841 | -1.494698 |
| H     | -1.647065               | -2.239492 | -2.882294 |
| H     | 1.037486                | 0.834561  | 0.716520  |
| C     | 3.483623                | 2.150702  | -0.466795 |
| H     | 3.723550                | 3.218473  | -0.544610 |
| H     | 2.437816                | 2.037020  | -0.782462 |
| C     | 3.637770                | 1.745577  | 0.998354  |
| H     | 2.942894                | 2.321233  | 1.621847  |
| H     | 4.657718                | 1.986392  | 1.330975  |
| N     | 3.332702                | 0.319054  | 1.198088  |
| H     | 3.549505                | 0.045835  | 2.163926  |
| C     | 4.392375                | 1.372084  | -1.416988 |
| H     | 4.110875                | 0.314541  | -1.476621 |
| H     | 4.330617                | 1.775842  | -2.430839 |
| H     | 5.438776                | 1.429321  | -1.097217 |
| H     | 3.934503                | -0.266140 | 0.618357  |
| C     | 0.039679                | 3.732452  | -0.064086 |
| C     | -1.181875               | 3.843058  | -0.917141 |
| H     | -1.965235               | 3.182916  | -0.544884 |
| H     | -1.523383               | 4.882983  | -0.907595 |
| H     | -0.935418               | 3.605313  | -1.956208 |
| O     | 0.209223                | 2.921913  | 0.843608  |
| O     | 0.968696                | 4.629595  | -0.373169 |
| N     | -1.033897               | 0.154153  | 0.095529  |
| C     | -1.863780               | 0.277631  | 1.275648  |
| C     | -3.183041               | -0.477080 | 1.111366  |
| C     | -3.720692               | -0.123434 | -0.276026 |
| O     | -5.026700               | -0.105776 | -0.400201 |
| N     | -2.982477               | 0.107781  | -1.312841 |
| C     | -1.631745               | 0.136167  | -1.050941 |
| O     | -0.915452               | 0.188642  | -2.173358 |
| H     | -1.311887               | -0.136908 | 2.133931  |
| O     | -2.217885               | 1.615810  | 1.527239  |

## Continued (5R,6S)-TgH TS

| Atoms | Coordinates (Angstroms) |           |           |
|-------|-------------------------|-----------|-----------|
|       | X                       | Y         | Z         |
| H     | -1.409385               | 2.162853  | 1.460023  |
| H     | -5.404645               | -0.192142 | 0.499978  |
| H     | 0.027035                | 0.244801  | -1.934968 |
| H     | 1.713008                | 4.508478  | 0.242071  |
| O     | -4.133910               | -0.082788 | 2.072898  |
| H     | -3.982751               | 0.857995  | 2.283411  |
| C     | -2.981871               | -1.986761 | 1.218625  |
| H     | -2.783381               | -2.230653 | 2.265869  |
| H     | -3.881144               | -2.526381 | 0.907704  |
| H     | -2.139849               | -2.308194 | 0.596007  |

## (5R,6S)-TgH PC:

| Atoms | Coordinates (Angstroms) |           |           |
|-------|-------------------------|-----------|-----------|
|       | X                       | Y         | Z         |
| O     | -0.980500               | -2.628072 | 0.645597  |
| C     | 0.035458                | -3.293807 | -0.057426 |
| C     | 1.370097                | -2.639737 | 0.233746  |
| O     | 1.437791                | -1.337434 | -0.419513 |
| C     | 1.639498                | -2.357165 | 1.714714  |
| O     | 3.039251                | -2.512722 | 1.925522  |
| C     | 1.249036                | -0.884387 | 1.850004  |
| C     | 1.708642                | -0.336720 | 0.508262  |
| H     | -0.156612               | -3.266910 | -1.141811 |
| H     | 0.091957                | -4.351950 | 0.246017  |
| H     | 2.173438                | -3.260739 | -0.177857 |
| H     | 1.070004                | -3.024205 | 2.371561  |
| H     | 0.161668                | -0.776542 | 1.875590  |
| H     | 1.692520                | -0.393794 | 2.722819  |
| C     | 3.391869                | -2.719957 | 3.287396  |
| H     | 4.476094                | -2.828145 | 3.322661  |
| H     | 3.088190                | -1.873591 | 3.917041  |
| H     | 2.924808                | -3.636194 | 3.666081  |
| C     | -2.267263               | -3.118400 | 0.289135  |
| H     | -2.343404               | -4.192059 | 0.504553  |
| H     | -2.999496               | -2.579351 | 0.891626  |
| H     | -2.466145               | -2.931601 | -0.772883 |
| H     | 1.232150                | 0.595259  | 0.195938  |
| C     | 3.440614                | 0.258953  | -1.977886 |
| H     | 3.815485                | 1.004710  | -2.687748 |
| H     | 2.362296                | 0.176654  | -2.153226 |
| C     | 3.701939                | 0.826516  | -0.590352 |

## Continued (5R,6S)-TgH PC

| Atoms | Coordinates (Angstroms) |           |           |
|-------|-------------------------|-----------|-----------|
|       | X                       | Y         | Z         |
| H     | 3.179033                | 1.775045  | -0.436265 |
| H     | 4.773102                | 0.973301  | -0.423768 |
| N     | 3.225594                | -0.082709 | 0.512118  |
| H     | 3.475963                | 0.337130  | 1.413213  |
| C     | 4.130547                | -1.080366 | -2.227470 |
| H     | 3.707012                | -1.880654 | -1.610287 |
| H     | 4.004222                | -1.385376 | -3.268175 |
| H     | 5.205991                | -1.018024 | -2.029513 |
| H     | 3.698111                | -0.998808 | 0.504539  |
| C     | 0.832491                | 2.852216  | -2.164124 |
| C     | -0.398803               | 2.328881  | -2.837546 |
| H     | -1.270912               | 2.505303  | -2.206082 |
| H     | -0.525015               | 2.786354  | -3.819291 |
| H     | -0.294755               | 1.245593  | -2.971489 |
| O     | 1.014333                | 2.925985  | -0.958724 |
| O     | 1.780289                | 3.227779  | -3.029802 |
| N     | -0.953838               | 0.621267  | 0.052873  |
| C     | -1.547537               | 1.604190  | 0.926796  |
| C     | -2.990156               | 1.253283  | 1.293146  |
| C     | -3.686317               | 0.800230  | 0.010167  |
| O     | -4.970848               | 1.073809  | -0.074276 |
| N     | -3.107538               | 0.151889  | -0.935273 |
| C     | -1.741687               | 0.012041  | -0.763192 |
| O     | -1.212405               | -0.853407 | -1.636734 |
| H     | -0.953084               | 1.651329  | 1.852414  |
| O     | -1.584374               | 2.880651  | 0.323044  |
| H     | -0.683339               | 3.080651  | 0.003122  |
| H     | -5.205340               | 1.650212  | 0.681580  |
| H     | -0.272941               | -0.953762 | -1.382809 |
| H     | 2.519491                | 3.617670  | -2.529156 |
| O     | -3.684764               | 2.358464  | 1.829257  |
| H     | -3.318835               | 3.164107  | 1.419188  |
| C     | -3.032552               | 0.122736  | 2.317730  |
| H     | -2.629552               | 0.497588  | 3.262999  |
| H     | -4.061246               | -0.207994 | 2.487797  |
| H     | -2.432548               | -0.727217 | 1.977783  |

**Table S23.** Cartesian coordinates for the optimized 5,6-diHThyH structures of the bifunctional pathway (Asp-Lys) at M06-2X/6-31+G(d)

5,6-diHThyH RC:

| Atoms | Coordinates (Angstroms) |           |           |
|-------|-------------------------|-----------|-----------|
|       | X                       | Y         | Z         |
| O     | -2.099199               | -2.157310 | 0.824525  |
| C     | -1.152324               | -3.110203 | 0.396294  |
| C     | 0.178617                | -2.414840 | 0.185109  |
| O     | 0.089853                | -1.435274 | -0.875382 |
| C     | 0.682193                | -1.631668 | 1.395795  |
| O     | 2.080484                | -1.781918 | 1.437148  |
| C     | 0.223098                | -0.183771 | 1.129562  |
| C     | -0.129872               | -0.144039 | -0.366376 |
| H     | -1.485657               | -3.583800 | -0.540199 |
| H     | -1.028377               | -3.903085 | 1.149405  |
| H     | 0.930780                | -3.142783 | -0.131223 |
| H     | 0.241651                | -2.017463 | 2.326641  |
| H     | -0.640726               | 0.042013  | 1.757039  |
| H     | 1.021853                | 0.529245  | 1.344780  |
| C     | 2.672021                | -1.278801 | 2.623788  |
| H     | 3.732544                | -1.529757 | 2.572169  |
| H     | 2.562755                | -0.190017 | 2.700347  |
| H     | 2.228533                | -1.759679 | 3.506385  |
| C     | -3.406766               | -2.701512 | 0.921652  |
| H     | -3.427352               | -3.538610 | 1.629768  |
| H     | -4.061675               | -1.906690 | 1.280659  |
| H     | -3.755855               | -3.040048 | -0.061719 |
| H     | 0.513893                | 0.540972  | -0.924126 |
| C     | 3.004399                | -0.641957 | -2.990664 |
| H     | 3.531875                | -0.506504 | -3.942048 |
| H     | 1.952125                | -0.382511 | -3.166321 |
| C     | 3.582488                | 0.325411  | -1.961703 |
| H     | 3.520986                | 1.348531  | -2.345698 |
| H     | 4.651181                | 0.100215  | -1.816603 |
| N     | 2.819154                | 0.274632  | -0.711164 |
| H     | 3.176791                | 0.968721  | -0.058450 |
| C     | 3.108648                | -2.100963 | -2.551335 |
| H     | 2.539255                | -2.278755 | -1.632373 |
| H     | 2.718906                | -2.778010 | -3.317844 |
| H     | 4.151776                | -2.377083 | -2.360134 |
| H     | 2.942912                | -0.626408 | -0.251583 |
| C     | 3.840228                | 2.793495  | 1.795370  |
| C     | 4.409984                | 3.776040  | 2.786073  |



## Continued 5,6-diHThyH RC

| Atoms | Coordinates (Angstroms) |           |           |
|-------|-------------------------|-----------|-----------|
|       | X                       | Y         | Z         |
| H     | 4.436315                | 4.781173  | 2.352659  |
| H     | 3.791570                | 3.784589  | 3.682334  |
| H     | 5.433228                | 3.494050  | 3.055251  |
| O     | 2.854343                | 2.121866  | 1.974232  |
| O     | 4.500935                | 2.673000  | 0.623001  |
| C     | -4.157049               | 1.055588  | -0.898031 |
| C     | -2.020548               | 1.444795  | 0.156484  |
| O     | -5.451735               | 1.281788  | -0.819436 |
| N     | -3.796200               | -0.127709 | -1.249343 |
| N     | -1.563611               | 0.273278  | -0.594018 |
| C     | -3.716553               | 3.312241  | 0.230715  |
| H     | -2.914075               | 4.011973  | 0.479840  |
| H     | -4.163303               | 2.970112  | 1.170872  |
| H     | -4.458978               | 3.888438  | -0.332635 |
| C     | -3.155060               | 2.148064  | -0.583715 |
| C     | -2.463374               | -0.405601 | -1.283617 |
| O     | -2.153626               | -1.407851 | -2.052308 |
| H     | -2.362443               | 1.131181  | 1.152887  |
| H     | -5.647764               | 2.195267  | -0.554817 |
| H     | -1.194212               | -1.629960 | -1.924927 |
| H     | 5.283215                | 3.245208  | 0.582042  |
| H     | -1.167300               | 2.118332  | 0.280691  |
| H     | -2.775463               | 2.517919  | -1.547375 |

## 5,6-diHThyH TS:

| Atoms | Coordinates (Angstroms) |           |           |
|-------|-------------------------|-----------|-----------|
|       | X                       | Y         | Z         |
| O     | 2.033433                | -1.566701 | -1.568658 |
| C     | 1.321324                | -2.720990 | -1.203545 |
| C     | -0.069234               | -2.311357 | -0.771434 |
| O     | -0.008897               | -1.618203 | 0.525566  |
| C     | -0.761596               | -1.318078 | -1.711322 |
| O     | -2.117769               | -1.682409 | -1.790975 |
| C     | -0.519154               | 0.044199  | -1.027438 |
| C     | -0.281290               | -0.349728 | 0.398640  |
| H     | 1.832752                | -3.255557 | -0.388922 |
| H     | 1.225463                | -3.410656 | -2.057784 |
| H     | -0.698760               | -3.188169 | -0.601106 |
| H     | -0.301416               | -1.341403 | -2.707971 |
| H     | 0.395388                | 0.483817  | -1.431378 |
| H     | -1.349315               | 0.746659  | -1.124842 |

## Continued 5,6-diHThyH TS

| Atoms | Coordinates (Angstroms) |           |           |
|-------|-------------------------|-----------|-----------|
|       | X                       | Y         | Z         |
| C     | -2.836546               | -0.979739 | -2.792167 |
| H     | -3.850704               | -1.380325 | -2.784659 |
| H     | -2.871050               | 0.096366  | -2.582806 |
| H     | -2.386945               | -1.149620 | -3.779023 |
| C     | 3.380875                | -1.855020 | -1.917088 |
| H     | 3.418413                | -2.532770 | -2.779377 |
| H     | 3.854442                | -0.906891 | -2.172678 |
| H     | 3.910691                | -2.298879 | -1.065525 |
| H     | -0.466257               | 0.216408  | 1.296260  |
| C     | -2.283802               | -1.661919 | 2.984227  |
| H     | -2.587731               | -1.622611 | 4.036294  |
| H     | -1.206179               | -1.450269 | 2.961819  |
| C     | -3.038352               | -0.572247 | 2.224732  |
| H     | -2.799807               | 0.412590  | 2.643903  |
| H     | -4.121544               | -0.717352 | 2.354573  |
| N     | -2.659950               | -0.557949 | 0.806448  |
| H     | -3.131664               | 0.202870  | 0.317187  |
| C     | -2.539905               | -3.061325 | 2.427434  |
| H     | -2.166272               | -3.160805 | 1.401497  |
| H     | -2.040299               | -3.824152 | 3.030843  |
| H     | -3.611478               | -3.291653 | 2.419433  |
| H     | -2.945859               | -1.416322 | 0.338638  |
| C     | -4.269706               | 2.521748  | -0.406095 |
| C     | -4.989145               | 3.727925  | -0.948429 |
| H     | -4.981808               | 4.539643  | -0.212442 |
| H     | -4.496843               | 4.060939  | -1.861194 |
| H     | -6.031584               | 3.479431  | -1.170743 |
| O     | -3.311563               | 1.998697  | -0.922330 |
| O     | -4.743845               | 1.998088  | 0.743702  |
| C     | 4.345271                | 1.336452  | 0.512225  |
| C     | 1.991462                | 1.833236  | 0.201502  |
| O     | 5.589982                | 1.675460  | 0.208017  |
| N     | 4.086601                | 0.080188  | 0.586893  |
| N     | 1.732466                | 0.495944  | 0.708183  |
| C     | 3.631342                | 3.768190  | 0.154828  |
| H     | 2.793052                | 4.454307  | 0.304937  |
| H     | 3.812840                | 3.697234  | -0.923415 |
| H     | 4.498386                | 4.238375  | 0.632215  |
| C     | 3.298478                | 2.406001  | 0.759349  |
| C     | 2.777312                | -0.244911 | 0.878868  |
| O     | 2.674614                | -1.482117 | 1.358174  |

## Continued 5,6-diHThyH TS

| Atoms | Coordinates (Angstroms) |           |           |
|-------|-------------------------|-----------|-----------|
|       | X                       | Y         | Z         |
| H     | 2.055100                | 1.814266  | -0.900142 |
| H     | 5.699090                | 2.638379  | 0.171803  |
| H     | 1.735118                | -1.682847 | 1.514278  |
| H     | -5.519381               | 2.480018  | 1.071761  |
| H     | 1.154311                | 2.485059  | 0.473129  |
| H     | 3.194394                | 2.499494  | 1.851086  |

## 5,6-diHThyH PC:

| Atoms | Coordinates (Angstroms) |           |           |
|-------|-------------------------|-----------|-----------|
|       | X                       | Y         | Z         |
| O     | -1.842044               | -2.057119 | 0.777479  |
| C     | -0.974268               | -3.006012 | 0.214878  |
| C     | 0.436435                | -2.452651 | 0.204030  |
| O     | 0.582343                | -1.441573 | -0.834243 |
| C     | 0.832993                | -1.749478 | 1.504418  |
| O     | 2.227336                | -1.973367 | 1.691531  |
| C     | 0.553229                | -0.281142 | 1.179914  |
| C     | 0.980653                | -0.225187 | -0.276165 |
| H     | -1.283440               | -3.263301 | -0.809429 |
| H     | -0.975869               | -3.932110 | 0.813457  |
| H     | 1.143036                | -3.258966 | -0.019160 |
| H     | 0.265202                | -2.121257 | 2.365048  |
| H     | -0.523844               | -0.098746 | 1.203001  |
| H     | 1.072533                | 0.428239  | 1.828217  |
| C     | 2.699547                | -1.589503 | 2.974348  |
| H     | 3.751294                | -1.874465 | 3.020990  |
| H     | 2.607755                | -0.507573 | 3.132002  |
| H     | 2.147285                | -2.120497 | 3.758625  |
| C     | -3.192215               | -2.497533 | 0.759664  |
| H     | -3.294573               | -3.440280 | 1.314248  |
| H     | -3.788393               | -1.721858 | 1.241347  |
| H     | -3.541285               | -2.624429 | -0.271906 |
| H     | 0.545237                | 0.593403  | -0.850980 |
| C     | 2.753317                | -0.729056 | -2.802320 |
| H     | 3.200650                | -0.333820 | -3.721077 |
| H     | 1.677223                | -0.800221 | -2.981461 |
| C     | 3.034292                | 0.298477  | -1.714049 |
| H     | 2.584718                | 1.269437  | -1.946250 |
| H     | 4.111220                | 0.446098  | -1.577675 |
| N     | 2.498428                | -0.096231 | -0.371529 |
| H     | 2.786883                | 0.614280  | 0.329272  |

## Continued 5,6-diHThyH PC

| Atoms | Coordinates (Angstroms) |           |           |
|-------|-------------------------|-----------|-----------|
|       | X                       | Y         | Z         |
| C     | 3.334698                | -2.106677 | -2.493466 |
| H     | 2.835975                | -2.575285 | -1.636916 |
| H     | 3.204121                | -2.781538 | -3.345923 |
| H     | 4.410296                | -2.045956 | -2.280396 |
| H     | 2.900706                | -0.983928 | -0.036629 |
| C     | 3.908537                | 2.634657  | 1.589262  |
| C     | 4.257512                | 3.675242  | 2.614489  |
| H     | 4.157241                | 4.677538  | 2.185926  |
| H     | 3.591186                | 3.578165  | 3.469898  |
| H     | 5.293564                | 3.545916  | 2.944284  |
| O     | 3.031985                | 1.805945  | 1.717458  |
| O     | 4.621527                | 2.622313  | 0.450609  |
| C     | -4.457086               | 1.040136  | -0.859618 |
| C     | -2.291494               | 1.895280  | -0.168489 |
| O     | -5.774761               | 1.054604  | -0.664159 |
| N     | -3.930634               | -0.079002 | -1.188710 |
| N     | -1.709311               | 0.806810  | -0.928937 |
| C     | -4.311284               | 3.367735  | 0.205719  |
| H     | -3.620283               | 4.202638  | 0.354996  |
| H     | -4.547538               | 2.952851  | 1.192088  |
| H     | -5.222325               | 3.798698  | -0.225026 |
| C     | -3.661717               | 2.321052  | -0.697657 |
| C     | -2.548168               | -0.062059 | -1.357714 |
| O     | -2.122167               | -1.140466 | -2.027674 |
| H     | -2.397288               | 1.592376  | 0.888954  |
| H     | -6.083104               | 1.939408  | -0.417238 |
| H     | -1.148524               | -1.154346 | -1.949446 |
| H     | 5.302774                | 3.314366  | 0.433688  |
| H     | -1.611756               | 2.753096  | -0.189953 |
| H     | -3.528753               | 2.735621  | -1.708673 |

**Table S24.** Cartesian coordinates for the optimized 5-OH-6HThyH structures of the bifunctional pathway (Asp-Lys) at M06-2X/6-31+G(d)

5-OH-6HThyH RC:

| Atoms | Coordinates (Angstroms) |           |           |
|-------|-------------------------|-----------|-----------|
|       | X                       | Y         | Z         |
| O     | -1.762900               | -2.245253 | 0.871325  |
| C     | -0.845576               | -3.157701 | 0.310535  |
| C     | 0.438791                | -2.421948 | -0.019959 |
| O     | 0.227450                | -1.433386 | -1.054491 |
| C     | 1.029946                | -1.640743 | 1.151820  |
| O     | 2.430688                | -1.756608 | 1.080389  |
| C     | 0.526676                | -0.198063 | 0.942785  |
| C     | 0.021272                | -0.156104 | -0.509589 |
| H     | -1.268417               | -3.614694 | -0.597919 |
| H     | -0.619466               | -3.967907 | 1.021245  |
| H     | 1.174500                | -3.126345 | -0.415928 |
| H     | 0.675064                | -2.045367 | 2.110410  |
| H     | -0.270426               | 0.016547  | 1.655811  |
| H     | 1.337814                | 0.522298  | 1.080658  |
| C     | 3.088167                | -1.297297 | 2.249857  |
| H     | 4.158648                | -1.430234 | 2.077582  |
| H     | 2.879841                | -0.237032 | 2.440875  |
| H     | 2.783566                | -1.895208 | 3.120970  |
| C     | -3.033536               | -2.832836 | 1.106256  |
| H     | -2.946379               | -3.684517 | 1.792400  |
| H     | -3.665417               | -2.066405 | 1.557235  |
| H     | -3.484804               | -3.162829 | 0.161554  |
| H     | 0.574661                | 0.557047  | -1.125650 |
| C     | 2.970052                | -0.893560 | -3.244455 |
| H     | 3.361563                | -0.865949 | -4.268205 |
| H     | 1.886144                | -0.731586 | -3.307311 |
| C     | 3.585442                | 0.253598  | -2.448635 |
| H     | 3.423452                | 1.197004  | -2.985166 |
| H     | 4.676246                | 0.102345  | -2.385173 |
| N     | 2.950775                | 0.374448  | -1.129488 |
| H     | 3.328961                | 1.171006  | -0.618693 |
| C     | 3.256631                | -2.260550 | -2.626333 |
| H     | 2.893298                | -2.318962 | -1.596151 |
| H     | 2.778495                | -3.060984 | -3.195261 |
| H     | 4.333030                | -2.462849 | -2.606953 |
| H     | 3.156858                | -0.444645 | -0.560812 |
| C     | 3.659921                | 2.556310  | 2.381809  |
| C     | 4.740815                | 3.606784  | 2.363567  |

## Continued 5-OH-6HThyH RC

| Atoms | Coordinates (Angstroms) |           |           |
|-------|-------------------------|-----------|-----------|
|       | X                       | Y         | Z         |
| H     | 5.676607                | 3.191645  | 2.751038  |
| H     | 4.896309                | 3.947419  | 1.340820  |
| H     | 4.459799                | 4.457927  | 2.991160  |
| O     | 3.100813                | 2.124119  | 1.403625  |
| O     | 3.311981                | 2.074110  | 3.593568  |
| C     | -4.092000               | 0.889897  | -0.570923 |
| C     | -1.847160               | 1.380206  | 0.203471  |
| O     | -5.371747               | 1.061857  | -0.319477 |
| N     | -3.718686               | -0.267529 | -0.973179 |
| N     | -1.442457               | 0.211606  | -0.570671 |
| C     | -3.596394               | 3.153973  | 0.514786  |
| H     | -2.795286               | 3.880847  | 0.686819  |
| H     | -3.917632               | 2.777821  | 1.491107  |
| H     | -4.420110               | 3.697943  | 0.040068  |
| C     | -3.093552               | 2.038571  | -0.394624 |
| C     | -2.387015               | -0.486456 | -1.172142 |
| O     | -2.133945               | -1.466439 | -1.987518 |
| H     | -2.048558               | 1.088012  | 1.242864  |
| H     | -5.582151               | 1.982638  | -0.094950 |
| H     | -1.158843               | -1.646355 | -1.987419 |
| H     | 3.827854                | 2.483059  | 4.305964  |
| H     | -1.013220               | 2.091540  | 0.200528  |
| O     | -2.871109               | 2.481802  | -1.716160 |
| H     | -2.334488               | 3.290885  | -1.713996 |

## 5-OH-6HThyH TS:

| Atoms | Coordinates (Angstroms) |           |           |
|-------|-------------------------|-----------|-----------|
|       | X                       | Y         | Z         |
| O     | 1.486294                | -1.408339 | -2.014224 |
| C     | 0.744995                | -2.573214 | -1.760937 |
| C     | -0.528636               | -2.193859 | -1.039044 |
| O     | -0.226024               | -1.798664 | 0.346775  |
| C     | -1.270267               | -0.988904 | -1.625291 |
| O     | -2.647267               | -1.265043 | -1.555105 |
| C     | -0.831175               | 0.180439  | -0.717968 |
| C     | -0.403130               | -0.526734 | 0.528765  |
| H     | 1.326783                | -3.286206 | -1.156990 |
| H     | 0.464426                | -3.072539 | -2.702690 |
| H     | -1.194517               | -3.055581 | -0.954485 |
| H     | -0.968214               | -0.814331 | -2.665991 |
| H     | 0.034897                | 0.677603  | -1.159738 |

## Continued 5-OH-6HThyH TS

| Atoms | Coordinates (Angstroms) |           |           |
|-------|-------------------------|-----------|-----------|
|       | X                       | Y         | Z         |
| H     | -1.622170               | 0.909850  | -0.522561 |
| C     | -3.442416               | -0.349112 | -2.293220 |
| H     | -4.475709               | -0.683050 | -2.191198 |
| H     | -3.344445               | 0.672150  | -1.906670 |
| H     | -3.159644               | -0.366149 | -3.353807 |
| C     | 2.733950                | -1.691252 | -2.633756 |
| H     | 2.579773                | -2.210402 | -3.588453 |
| H     | 3.224808                | -0.734520 | -2.813285 |
| H     | 3.362871                | -2.299241 | -1.972720 |
| H     | -0.378736               | -0.161233 | 1.539911  |
| C     | -2.267460               | -2.523303 | 2.868456  |
| H     | -2.429194               | -2.856698 | 3.899802  |
| H     | -1.184439               | -2.395653 | 2.744613  |
| C     | -2.960777               | -1.176506 | 2.686217  |
| H     | -2.560877               | -0.454507 | 3.407041  |
| H     | -4.033904               | -1.288119 | 2.904285  |
| N     | -2.733287               | -0.635348 | 1.337679  |
| H     | -3.146744               | 0.292487  | 1.247612  |
| C     | -2.777927               | -3.590942 | 1.902709  |
| H     | -2.582139               | -3.323101 | 0.857715  |
| H     | -2.296210               | -4.555167 | 2.088197  |
| H     | -3.859373               | -3.732250 | 2.011539  |
| H     | -3.180772               | -1.214206 | 0.626920  |
| C     | -4.029309               | 3.004447  | -0.310181 |
| C     | -5.069585               | 3.870532  | 0.349976  |
| H     | -6.052819               | 3.675866  | -0.091303 |
| H     | -5.105033               | 3.650210  | 1.415706  |
| H     | -4.835357               | 4.929786  | 0.204587  |
| O     | -3.379185               | 2.151615  | 0.247781  |
| O     | -3.827626               | 3.201722  | -1.627218 |
| C     | 4.362335                | 0.867850  | 0.178406  |
| C     | 2.029679                | 1.544827  | 0.389900  |
| O     | 5.573053                | 1.195305  | -0.246881 |
| N     | 4.002760                | -0.352785 | 0.057138  |
| N     | 1.735913                | 0.148711  | 0.636821  |
| C     | 3.778823                | 3.353563  | 0.328264  |
| H     | 3.013506                | 4.045896  | 0.696479  |
| H     | 3.802231                | 3.432408  | -0.763222 |
| H     | 4.734298                | 3.695946  | 0.740897  |
| C     | 3.455463                | 1.937724  | 0.795873  |
| C     | 2.725564                | -0.660094 | 0.488598  |

## Continued 5-OH-6HThyH TS

| Atoms | Coordinates (Angstroms) |           |           |
|-------|-------------------------|-----------|-----------|
|       | X                       | Y         | Z         |
| O     | 2.593131                | -1.964822 | 0.719002  |
| H     | 1.894622                | 1.779136  | -0.679191 |
| H     | 5.787841                | 2.117776  | -0.038270 |
| H     | 1.687298                | -2.141053 | 1.026163  |
| H     | -4.394140               | 3.906689  | -1.979186 |
| H     | 1.319784                | 2.165100  | 0.953464  |
| O     | 3.666835                | 1.791362  | 2.187774  |
| H     | 3.119154                | 2.431187  | 2.669522  |

## 5-OH-6HThyH PC:

| Atoms | Coordinates (Angstroms) |           |           |
|-------|-------------------------|-----------|-----------|
|       | X                       | Y         | Z         |
| O     | -1.509015               | -2.136797 | 0.826284  |
| C     | -0.690004               | -3.077169 | 0.181789  |
| C     | 0.706484                | -2.507958 | 0.029984  |
| O     | 0.742350                | -1.502893 | -1.023292 |
| C     | 1.218995                | -1.791865 | 1.281912  |
| O     | 2.627780                | -1.998080 | 1.333781  |
| C     | 0.892482                | -0.327880 | 0.981672  |
| C     | 1.168578                | -0.278646 | -0.512300 |
| H     | -1.097104               | -3.340874 | -0.806164 |
| H     | -0.621540               | -4.001752 | 0.779281  |
| H     | 1.395774                | -3.309903 | -0.255188 |
| H     | 0.742864                | -2.165855 | 2.195435  |
| H     | -0.179187               | -0.153045 | 1.117399  |
| H     | 1.476709                | 0.387018  | 1.563581  |
| C     | 3.213255                | -1.612735 | 2.569159  |
| H     | 4.271909                | -1.868886 | 2.509435  |
| H     | 3.105187                | -0.536817 | 2.751298  |
| H     | 2.754703                | -2.169229 | 3.395281  |
| C     | -2.843307               | -2.603002 | 0.965137  |
| H     | -2.867095               | -3.523136 | 1.564372  |
| H     | -3.404989               | -1.819336 | 1.474489  |
| H     | -3.293332               | -2.782393 | -0.018328 |
| H     | 0.672611                | 0.530551  | -1.048189 |
| C     | 2.805974                | -0.961611 | -3.135049 |
| H     | 3.200344                | -0.634365 | -4.103117 |
| H     | 1.728363                | -1.087909 | -3.259175 |
| C     | 3.091560                | 0.171214  | -2.158330 |
| H     | 2.570363                | 1.091591  | -2.440175 |
| H     | 4.165720                | 0.384534  | -2.111182 |



## Continued 5-OH-6HThyH PC

| Atoms | Coordinates (Angstroms) |           |           |
|-------|-------------------------|-----------|-----------|
|       | X                       | Y         | Z         |
| N     | 2.671949                | -0.130968 | -0.750971 |
| H     | 3.000352                | 0.625522  | -0.129249 |
| C     | 3.455360                | -2.281578 | -2.728316 |
| H     | 3.013855                | -2.689344 | -1.812180 |
| H     | 3.317509                | -3.033296 | -3.508330 |
| H     | 4.533281                | -2.164526 | -2.568836 |
| H     | 3.119336                | -0.987287 | -0.388133 |
| C     | 3.728594                | 2.463334  | 2.211317  |
| C     | 4.620321                | 3.670512  | 2.316934  |
| H     | 5.502256                | 3.431893  | 2.920791  |
| H     | 4.938538                | 3.976030  | 1.321495  |
| H     | 4.089757                | 4.497140  | 2.800177  |
| O     | 3.459736                | 1.898519  | 1.173197  |
| O     | 3.208170                | 1.987362  | 3.352279  |
| C     | -4.327117               | 0.911947  | -0.561878 |
| C     | -2.091751               | 1.764820  | -0.077853 |
| O     | -5.621486               | 0.936963  | -0.257031 |
| N     | -3.829480               | -0.199816 | -0.943052 |
| N     | -1.587732               | 0.669353  | -0.873298 |
| C     | -4.057136               | 3.184792  | 0.581261  |
| H     | -3.343210               | 4.004891  | 0.717741  |
| H     | -4.215982               | 2.711728  | 1.555480  |
| H     | -4.993871               | 3.638416  | 0.238986  |
| C     | -3.509199               | 2.202185  | -0.450724 |
| C     | -2.467243               | -0.189140 | -1.231922 |
| O     | -2.109957               | -1.264624 | -1.943135 |
| H     | -2.081177               | 1.487789  | 0.990501  |
| H     | -5.921034               | 1.839600  | -0.070229 |
| H     | -1.135264               | -1.256202 | -1.989957 |
| H     | 3.487492                | 2.502601  | 4.124075  |
| H     | -1.423865               | 2.630516  | -0.187142 |
| O     | -3.565479               | 2.747755  | -1.758684 |
| H     | -2.969188               | 3.510971  | -1.816180 |

## 6. The linear correlation of charge distribution at each stationary point calculated by ABEEM method and QM

**Table S25.** The linear correlation of charge distribution at each stationary point calculated by ABEEM method and QM on the monofunctional reaction pathway

| Local conservation conditions 1 |      | Local conservation conditions 2 |      | Local conservation conditions 3 |      |
|---------------------------------|------|---------------------------------|------|---------------------------------|------|
| Reaction steps                  | R    | Reaction steps                  | R    | Reaction steps                  | R    |
| 1                               | 0.96 | 51                              | 0.97 | 66                              | 0.97 |
| 4                               | 0.96 | 54                              | 0.97 | 69                              | 0.97 |
| 7                               | 0.96 | 57                              | 0.97 | 72                              | 0.97 |
| 10                              | 0.96 | 60                              | 0.96 | 75                              | 0.97 |
| 13                              | 0.96 | 63                              | 0.96 | 78                              | 0.97 |
| 16                              | 0.96 | -                               | -    | 81                              | 0.97 |
| 19                              | 0.96 | -                               | -    | 84                              | 0.97 |
| 22                              | 0.96 | -                               | -    | 87                              | 0.97 |
| 25                              | 0.96 | -                               | -    | 90                              | 0.97 |
| 28                              | 0.97 | -                               | -    | 93                              | 0.97 |
| 31                              | 0.97 | -                               | -    | 96                              | 0.97 |
| 34                              | 0.97 | -                               | -    | 98                              | 0.97 |
| 37                              | 0.97 | -                               | -    | 100                             | 0.97 |
| 40                              | 0.97 | -                               | -    | -                               | -    |
| 43                              | 0.97 | -                               | -    | -                               | -    |
| 46                              | 0.97 | -                               | -    | -                               | -    |
| 48                              | 0.97 | -                               | -    | -                               | -    |
